# Supplementary material for: Potentially traumatic interpersonal events, psychological distress and recurrent headache in a population-based cohort of adolescents: the HUNT study
Source: PubMed Central journal article supplement — BMJ Open. 2013 Jul 29;3(7):e002997. doi: 10.1136/bmjopen-2013-002997 (PMC3731723; doi:10.1136/bmjopen-2013-002997), 2013-07-29
Supplement: bmjopen-2013-002997.draft_revisions.pdf [file bmjopen-2013-002997.draft_revisions.pdf]

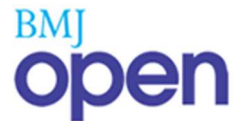

**Potentially Traumatic Interpersonal Events, Psychological  
Distress and Recurrent Headaches in Adolescents  
A population based study  
The HUNT Study**

|                                 |                                                                                                                                                                                                                                                                                                                                                                                                                                                                                          |
|---------------------------------|------------------------------------------------------------------------------------------------------------------------------------------------------------------------------------------------------------------------------------------------------------------------------------------------------------------------------------------------------------------------------------------------------------------------------------------------------------------------------------------|
| Journal:                        | <i>BMJ Open</i>                                                                                                                                                                                                                                                                                                                                                                                                                                                                          |
| Manuscript ID:                  | bmjopen-2013-002997                                                                                                                                                                                                                                                                                                                                                                                                                                                                      |
| Article Type:                   | Research                                                                                                                                                                                                                                                                                                                                                                                                                                                                                 |
| Date Submitted by the Author:   | 04-Apr-2013                                                                                                                                                                                                                                                                                                                                                                                                                                                                              |
| Complete List of Authors:       | Stensland, Synne; Norwegian Centre for Violence and Traumatic Stress Studies, NKVTS ,<br>Dyb, Grete; Norwegian Centre for Violence and Traumatic Stress Studies, NKVTS, ; University of Oslo , Department of Clinical Medicine<br>Thoresen, Siri; Norwegian Centre for Violence and Traumatic Stress Studies, NKVTS,<br>Wentzel-Larsen, Tore; Norwegian Centre for Violence and Traumatic Stress Studies, NKVTS,<br>Zwart, John-Anker; Oslo University Hospital, Department of Neurology |
| <b>Primary Subject Heading</b>: | Epidemiology                                                                                                                                                                                                                                                                                                                                                                                                                                                                             |
| Secondary Subject Heading:      | Neurology, Paediatrics, Mental health                                                                                                                                                                                                                                                                                                                                                                                                                                                    |
| Keywords:                       | Epidemiology < TROPICAL MEDICINE, Migraine < NEUROLOGY, Child & adolescent psychiatry < PSYCHIATRY, Anxiety disorders < PSYCHIATRY, Depression & mood disorders < PSYCHIATRY, PUBLIC HEALTH                                                                                                                                                                                                                                                                                              |
|                                 |                                                                                                                                                                                                                                                                                                                                                                                                                                                                                          |

SCHOLARONE™  
Manuscripts

# Potentially Traumatic Interpersonal Events, Psychological Distress and Recurrent Headaches in Adolescents

A population based study

The HUNT Study

Synne Ø. Stensland, Grete Dyb, Siri Thoresen, Tore Wentzel-Larsen, John-Anker Zwart

Norwegian Centre for Violence and Traumatic Stress Studies, Kirkeveien 166, bygning 48, 0450 Oslo, Norway

(Synne Ø. Stensland MD, Grete Dyb MD PhD Researcher II, Siri Thoresen PhD Researcher II and Tore Wentzel-

Larsen Cand.Real Statistician), Faculty of Medicine, University of Oslo, Postboks 1078, Blindern, 0316 Oslo,

Norway (Synne Ø. Stensland PhD candidate, Grete Dyb MD PhD Associate Professor and John-Anker Zwart MD

PhD Professor), Centre for Child and Adolescent Mental Health, Eastern and Southern Norway, Postboks 4623

Nydalen, 0405 Oslo, Norway (Tore Wentzel-Larsen Statistician), Department of Neurology/FORMI, Ullevål

sykehus, Oslo University Hospital, Postboks 4956 Nydalen, 0424 Oslo (John-Anker Zwart MD PhD Professor)

Correspondence to: Synne Øien Stensland, [synne.stensland@nkvts.unirand.no](mailto:synne.stensland@nkvts.unirand.no) Norwegian Centre for Violence  
and Traumatic Stress Studies, Kirkeveien 166, bygning 48, 0450 Oslo, Norway (mail address may be published),

Tel: +47 22 59 55 00/ + 47 90 55 80 09, Fax: +47 22 59 55 01

**Key words (MeSH):** Adolescent, Crime, Bullying, Mental disorders, Headache disorders, (Public  
Health)

## WORD COUNT AND TABLES

Text only: 3918 words

Abstract: 300 words

Tables: 5

Image: Flowchart attached as supplementary file

1  
2  
3  
4  
5  
6  
7  
8  
9  
10  
11  
12  
13  
14  
15  
16  
17  
18  
19  
20  
21  
22  
23  
24  
25  
26  
27  
28  
29  
30  
31  
32  
33  
34  
35  
36  
37  
38  
39  
40  
41  
42  
43  
44  
45  
46  
47  
48  
49  
50  
51  
52  
53  
54  
55  
56  
57  
58  
59  
60

For peer review only

## ARTICLE SUMMARY

### Article Focus

- The present study was designed to acquire knowledge of associations between exposure to potentially traumatic interpersonal events and clinically validated measures of the range of recurrent headache disorders experienced in a population-based cohort of adolescents, meeting the criteria of the International Classification of Headache Disorder (ICHD-II).
- Possible mediation through psychological distress was tested specifically.

### Key Messages

- Our study suggests a strong, consistent and cumulative relationship between exposure to increasing number of types of interpersonal trauma and recurrent headache, regardless of subtype or frequency of complaints, classified according to the ICHD-II criteria.
- This study indicates that traumatized adolescents experience higher levels of psychological distress than their non-victimized peers, which in turn seem to enhance their susceptibility to chronification of all common recurrent headache disorders. Thus psychological distress may play an important mediating role on the pathway linking victimization to recurrent headache complaints.
- Although prospective studies are needed the observed dependency between interpersonal trauma exposure and highly prevalent psychological and somatic conditions in adolescence challenges the traditional dichotomization of health services.

### Strengths and Limitations

- The strengths of this study were the large sample size, the overall high participation rate, the use of a validated headache interview based upon the ICHD (II) criteria, and the opportunity to assess the impact of several types of victimization and confounding factors, within a population-based cohort of adolescents.
- The retrospective, cross-sectional study-design does not allow for causal inference, and findings should thus be interpreted within the given constraints of the study.

For peer review only

**ABSTRACT**

**Context** Recurrent headache, cooccurs commonly with psychological distress. Traumatic events could represent important precursors of posttraumatic distress and headache.

**Objective** To assess the hypothesized association between exposure to potentially traumatic interpersonal events (PTIEs) and recurrent headache across the spectrum of headache complaints experienced by adolescents and examine the potential role of psychological distress as a mediator of this relationship.

**Design** The Young-HUNT 3 study, 2006–2008, is a population-based, cross-sectional, cohort study of Norwegian youth that includes self-report data on traumatic exposure, psychological distress, and a validated interview on headache.

**Setting and Participants** A cohort of 10 464 adolescents aged 12–20 years from the Nord-Trøndelag county were invited to participate.

**Main Outcome Measures** Data from the headache interview served as outcome. Recurrent headache was defined as headache recurring at least monthly during the past year and was further subclassified into monthly, weekly, and daily complaints. Subtypes were classified as tension-type, migraine, migraine with tension-type headache and/or 'other' headache, in accordance with the International Classification of Headache Disorders.

**Results** The response rate was 73% (7 620). Multiple logistic regression analysis, adjusted for sociodemographics, showed a steady trend of increasing odds for recurrent headache with increasing exposure to PTIEs. The same pattern was reproduced for all frequencies and subtypes of complaints. The direct association between exposure to PTIEs and all recurrent headache disorders decreased after the hypothesized mediator, psychological distress, was

1  
2  
3 entered into the regression equation. Bootstrap confidence intervals for the magnitude of  
4  
5 the attenuation in odds ratio indicated a significant decrease, suggesting mediation by  
6  
7 psychological distress.  
8  
9

10  
11 **Conclusions** The empirical evidence of a strong, cumulative relationship between  
12  
13 victimization and recurrent headache, possibly mediated by posttraumatic psychological  
14  
15 distress, indicates a need for integration of somatic and psychological health care of  
16  
17 adolescents in prevention, assessment, and treatment of headache. Prospective studies are  
18  
19 needed.  
20  
21  
22  
23  
24  
25  
26  
27  
28  
29  
30  
31  
32  
33  
34  
35  
36  
37  
38  
39  
40  
41  
42  
43  
44  
45  
46  
47  
48  
49  
50  
51  
52  
53  
54  
55  
56  
57  
58  
59  
60

1  
2  
3 Recurrent headache is the most common pain condition during adolescence, and associated  
4  
5 with limitations in everyday life, affecting school functioning and relationships with family  
6  
7 and peers.[1 2] Prepubertal onset of headache and severe, frequent or persistent complaints,  
8  
9 migraine, and co-occurring psychological distress are related to chronification and enduring  
10  
11 disability,[3 4] with headache complaints and functional impairment often persisting into  
12  
13 adulthood.[5] From early childhood to adolescence there is a marked increase in the  
14  
15 prevalence of headache, which is accompanied by an emerging discrepancy between  
16  
17 genders, with prevalence stabilizing in boys and increasing gradually throughout adolescence  
18  
19 in girls.[6]  
20  
21  
22  
23  
24

25 Primary tension-type and migraine headaches are by far the most frequent subtypes  
26  
27 of recurrent headache in adolescence.[6] Secondary headache disorders are related to other  
28  
29 conditions such as medication overuse,[7] infection or trauma, although these partly overlap  
30  
31 with the preceding.[8] The etiological pathways leading to onset and chronification of  
32  
33 headache disorders are largely unknown,[9] yet recognized as multifactorial, including  
34  
35 heredity, age and sex, somatic, psychological and behavioural disorders,[10 11] head  
36  
37 injuries,[12] unfavourable lifestyle (such as smoking, inactivity,[13] and inadequacy of  
38  
39 sleep[1]), and lack of social and economic resources within families, in schools and  
40  
41 societies.[14-16] Despite distinguishing features related to migraine headaches, the primary  
42  
43 headaches may in part share pathophysiological mechanisms related to the chronification of  
44  
45 disorders,[9 17] reflected in an observed continuum of clinical severity ranging from  
46  
47 tension-type complaints, through migraine,[18] to combined migraine with tension-type  
48  
49 headache.[19]  
50  
51  
52  
53  
54  
55  
56  
57  
58  
59  
60



1  
2  
3 Recently researchers have explored the potential role of negative life events on the  
4  
5 development of psychosomatic outcomes including headache in adolescence. Positive  
6  
7 associations have been found between a range of childhood adversities and headache,  
8  
9 including economic hardship,[16] parental separation,[20] poor family environment or  
10  
11 neglect,[21] and potentially traumatic events such as disaster,[22] exposure to abuse [23 24],  
12  
13 and bullying.[25] A recent population-based study of adolescents has suggested a dose-  
14  
15 response relationship between frequency of childhood physical abuse and severe  
16  
17 headaches including migraine,[23] supported by findings from a large convenience sample  
18  
19 study of adults,[26] and a multicenter study of adult migraineurs, alike.[27] Despite these  
20  
21 suggestive findings the evidence for an association between exposure to childhood trauma  
22  
23 and recurrent headache is currently debated.[28]  
24  
25  
26  
27  
28

29  
30 The association between adverse experiences and mood and anxiety disorders in  
31  
32 adolescents on the other hand is thoroughly documented.[29] Exposure to interpersonal  
33  
34 traumatic events, especially early exposure to abuse, neglect or severe family adversity,[30]  
35  
36 witnessing domestic violence,[31] exposure to bullying[32] or sexually-related  
37  
38 victimization,[33] is recognized as particularly detrimental, and associated with prolonged  
39  
40 trajectories and comorbidity.[25 34] A steady aggravation of psychological distress is further  
41  
42 documented in relation to multiple victimization,[35] with findings from high-exposure  
43  
44 populations suggesting that cumulative traumatic exposure will, regardless of psychological  
45  
46 vulnerability, lead to psychological distress of clinical significance in anyone, although  
47  
48 thresholds vary individually.[34 36] These main trends seem to be similar for both sexes.[37]  
49  
50 Trauma exposure is generally evenly distributed in childhood, with discrepancies in trauma  
51  
52 profiles gradually emerging throughout adolescence, as girls continuously experience more  
53  
54 sexually-related and close network traumas, whilst boys get gradually more exposed to all  
55  
56  
57  
58  
59  
60

1  
2  
3 other types of single traumatic events. Generally, trauma-associated psychological distress,  
4  
5 is 2-3 times more often reported by adolescent girls in comparison to boys.[37]  
6  
7

8  
9 Thus, epidemiological evidence of a gradual increase in risk of exposure to traumatic  
10 events throughout childhood and adolescence,[33] strongly associated with onset of  
11 psychological distress,[30] which again often co-occurs with emerging recurrent headache  
12 complaints,[4] imply possible shared causal pathways.[38] Simply put, when adolescents  
13 experience something traumatic they get distressed. Further, psychological distress may  
14 function as an internal stressor, increasing individual susceptibility to onset and  
15  
16  
17  
18  
19  
20  
21  
22  
23  
24  
25  
26  
27  
28  
29  
30  
31  
32  
33  
34  
35  
36  
37  
38  
39  
40  
41  
42  
43  
44  
45  
46  
47  
48  
49  
50  
51  
52  
53  
54  
55  
56  
57  
58  
59  
60

chronification of headache complaints. Thus, mental distress may be an important mediator on the pathway linking trauma to recurrent headache complaints.

Although scientific interest in the associations between exposure to traumatic experiences and headache in adolescents has grown recently, we still lack substantiated insight into whether and eventually how exposure to traumatic events might relate to recurrent headache experienced in the general population.[28] Therefore, the present study was designed to acquire knowledge of associations between exposure to potentially traumatic interpersonal events and clinically validated measures of the range of recurrent headaches experienced in a population-based cohort of adolescents, meeting the International Classification of Headache Disorder criterias (ICHD-II). Possible mediation through psychological distress was tested specifically.

## METHODS

From 2006 until 2008, 10464 adolescents were invited to participate in Young-HUNT 3 (<http://www.ntnu.edu/hunt/inenglish>), which is a population-based, cross-sectional cohort-study of Norwegian youth in Nord-Trøndelag county. The study, which comprises a general health questionnaire, a clinical assessment, and a headache interview, was approved by the Norwegian Regional Committee for Medical and Health Research Ethics. Inclusion was based upon written consent from participants aged 16 years and older and from parents for those under 16, in accordance with Norwegian law.

### Participants

In 2006 there were 128 694 inhabitants in Nord-Trøndelag. Over 95% were ethnic Norwegians, the work force was generally well-educated and unemployment was less than 3%. All adolescents (10 464) in the county were invited to the study, 5614 were students in junior high, 4357 in senior high and 493 adolescents were not in school. Non-participation was mainly due to absence from school, or not wanting to participate. In total 8200 (78%) adolescents completed the general health questionnaire; more specifically 85% (4749) of the junior high students, 77% (3336) of the senior high students and 23% (115) of the adolescents not in school. Further, a total of 73% (7620) also completed the interview on headache.

During a school lesson, students completed a self-administered questionnaire containing over 100 health- and lifestyle-related questions, including items on potentially traumatic events, psychological distress, and posttraumatic stress reactions, in addition to background information on family structure and family economy [<http://www.ntnu.edu/hunt/data/que>].

1  
2  
3 A validated semi-structured clinical interview was conducted in association with a clinical  
4  
5 examination within 1 month of completion of the questionnaire, to assess adolescents'  
6  
7 recurring headache complaints according to type and frequency.[39]  
8  
9

### 10 11 12 13 14 **Recurrent Headache**

15  
16 All adolescents were asked if they had experienced recurring headache not caused by a cold  
17  
18 (infection) or illness within the past 12 months. 'Yes' responders were read two descriptive  
19  
20 texts of prototypic complaints for tension-type headache and migraine, in accordance with  
21  
22 the International Classification of Headache Disorders criteria, second edition (ICHD-II),[8]  
23  
24 and were asked if they recognized either, both or neither descriptions as resembling their  
25  
26 own complaints. Thus, the interview differentiated between three types of headache:  
27  
28 tension-type and/or migraine (with or without visual aura) and/or 'other' type of headache.  
29  
30 The frequency of recurrent headache was labeled as monthly (1–3 days/month), weekly (1–4  
31  
32 days/week), and daily (> 4 days/week). Adolescents reporting 'no recurrent headache' and  
33  
34 'complaints less than monthly' were defined as having 'no recurrent headache', whereas all  
35  
36 other headache frequencies were referred to as 'recurrent headache'. [40]  
37  
38  
39  
40  
41  
42

### 43 44 **Sociodemography**

45  
46 Information on sex was drawn from the Norwegian National Population Registry, whereas  
47  
48 age was calculated by subtracting the date of birth from the date of completion of the  
49  
50 questionnaire. The socio-demographic variable 'family structure' was computed from 12  
51  
52 self-reported items on cohabitants and was dichotomized into 'living with both parents'  
53  
54 versus 'other' family structures, such as living with a single parent, stepparents, foster  
55  
56  
57  
58  
59  
60

1  
2  
3 parents, or without guardians.[20 33] The variable ‘family economy’, based upon a self-  
4  
5 reported estimation of family affordance in comparison with most others, categorized as  
6  
7 ‘above average’, ‘average’ and ‘below average’, represented the socioeconomic situation, as  
8  
9 inequalities in family affluence has previously been shown to be strongly related to  
10  
11 inequalities in adolescent health.[16]  
12  
13

### 14 15 **Potentially Traumatic Interpersonal Events** 16

17  
18 A number of potentially traumatic events were screened, among which we identified 5 items  
19  
20 as being potentially traumatic interpersonal events (PTIEs), or victimizations. The items were  
21  
22 introduced using the following question: Have you ever experienced any of these events?  
23  
24 Select one of the following response options: ‘No’, ‘Yes, during the past year’, or ‘Yes, during  
25  
26 lifetime’. The PTIE-related questions in our study were formulated as follows: i) Been  
27  
28 subjected to violence (beaten or injured), ii) Seen others being subjected to violence, iii)  
29  
30 Been subjected to unpleasant/disagreeable sexual acts by someone approximately your own  
31  
32 age, iv) Been subjected to unpleasant/disagreeable sexual acts by an adult, and v) Been  
33  
34 threatened or physically harassed by fellow students at school over a period of time. These  
35  
36 items were dichotomized into ‘No, not experienced’ and ‘Yes, during lifetime’ (combining  
37  
38 the two original ‘yes’ categories).  
39  
40  
41  
42  
43  
44

### 45 **Psychological Distress** 46

47  
48 General psychological distress was measured by a five item, short-version instrument,  
49  
50 named SCL-5, modified from the Hopkin’s Symptom Checklist (HSCL), where every item was  
51  
52 measured on a four-point Likert scale.[41] The derived items were introduced as follows:  
53  
54 “Below is a list of some problems and complaints. Have you been bothered by any of this  
55  
56 during the last 14 days? (Select one alternative: 1 = ‘not bothered’, 2 = ‘a little bothered’, 3 =  
57  
58  
59  
60

1  
2  
3 'quite bothered', and 4 = 'very bothered') 'Been constantly afraid or anxious', 'Felt tense,  
4  
5 distressed or restless', 'Felt hopeless when you think about the future', 'Felt dejected or sad'  
6  
7 and 'Worried too much about different things?'. A mean score ranging from 1 to 4 was  
8  
9 computed. SCL-5 has previously been validated as a screening instrument for mental illness  
10  
11 or psychological distress.[42]  
12  
13

14  
15 Adolescents reporting one or more PTIEs were asked three yes/no questions on  
16  
17 posttraumatic stress reactions, derived from the child version of the UCLA PTSD index for  
18  
19 DSM-IV,[43] where two items measured current intrusion or reexperience, and one  
20  
21 measured current avoidance.  
22  
23

## 24 25 26 **STATISTICS**

27  
28  
29 Descriptive data were presented according to frequency of recurrent headache  
30  
31 complaints (Table 1). Adjusted odds ratios (ORs) and 95% confidence intervals (CIs) were  
32  
33 obtained from logistic regression models that estimated the likelihood of experiencing  
34  
35 recurrent headache according to each of the four categories of exposure to PTIEs within a  
36  
37 complete case sample of 6787/10464 (65%) adolescents (regression Model 1, Tables 2, 3, 4  
38  
39 and 5). The number of events was summed for each respondent (sum of PTIEs; range, 0–5)  
40  
41 and PTIE scores of 3, 4, or 5 were combined in one category ( $\geq 3$ ). All models included age,  
42  
43 and PTIE scores of 3, 4, or 5 were combined in one category ( $\geq 3$ ). All models included age,  
44  
45 sex, family structure, and family economy as covariates, based on a priori reasoning. The  
46  
47 main analysis of general recurrent headache was stratified according to sex (Table 2).  
48  
49

50  
51 Furthermore, we tested mediation by psychological distress. A significant attenuation of  
52  
53 the effect-size estimate (OR) for the association between exposure to PTIEs and recurrent  
54  
55 headache, when adding psychological distress to the multivariate logistic regression model  
56  
57 (regression Model 2 in Tables 2, 3, 4 and 5), may imply a mediating role by psychological  
58  
59  
60

1  
2  
3 distress.[44] We used bootstrap methods with 10 000 replicated samples to calculate  
4  
5 bootstrap percentile 95% CIs for the difference in ORs between the two models ( $1 - (\text{odds}$   
6  
7 ratio from Model 2 ( $OR_2$ )/odds ratio from Model 1 ( $OR_1$ )). Confidence intervals not including  
8  
9 1 indicated a significant difference between odds ratios.[45]  
10

11  
12 Test of proportional odds assumptions across frequencies and subtypes of headache  
13  
14 complaints was undertaken, but did not meet the requirement of proportionality in odds  
15  
16 relations (supplementary tables A1 and A2 in appendix, online only). Supplementary analysis  
17  
18 of group differences within frequencies and subtypes of recurrent headaches, in association  
19  
20 to exposure to PTIEs and psychological distress, were assessed in separate logistic regression  
21  
22 analyses (supplementary tables A3 and A4 in appendix, online only).  
23  
24

25  
26 Last, we performed a subgroup, multiple regression analysis of the 1740/6787 (26%)  
27  
28 adolescents who were exposed to any PTIEs, to explore whether specific posttraumatic  
29  
30 stress reactions served as a potential additional mediator of the relationship between  
31  
32 trauma and recurrent headache (Table 5).  
33  
34

35  
36 Analyses were undertaken using SPSS version 20, in combination with the program R  
37  
38 (The R Foundation for Statistical Computing, Vienna, Austria) package boot for bootstrap  
39  
40 calculations.  
41  
42  
43  
44  
45  
46  
47  
48  
49  
50  
51  
52  
53  
54  
55  
56  
57  
58  
59  
60

1  
2  
3  
4  
5  
6  
7  
8  
9  
10  
11  
12  
13  
14  
15  
16  
17  
18  
19  
20  
21  
22  
23  
24  
25  
26  
27  
28  
29  
30  
31  
32  
33  
34  
35  
36  
37  
38  
39  
40  
41  
42  
43  
44  
45  
46  
47  
48  
49  
50  
51  
52  
53  
54  
55  
56  
57  
58  
59  
60

**RESULTS**

The demographic data are displayed in Table 1.

For peer review only



**Table 1.** Sociodemographics, Exposure to PTIEs, Psychological Distress, and Headache Type, by Frequency of Headache Complaints (n=7620)\*†.

| Characteristics                    | No. of Individuals | Recurrent Headache    |            |            |            | p value |
|------------------------------------|--------------------|-----------------------|------------|------------|------------|---------|
|                                    |                    | No Recurrent Headache | Monthly    | Weekly     | Daily      |         |
| <b>Female</b>                      |                    |                       |            |            |            |         |
| Headache, No. (%)                  | 3832               | 2707 (71)             | 653 (17)   | 385 (10)   | 87 (2)     |         |
| TTH                                |                    | 0 (0)                 | 461 (71)   | 249 (65)   | 39 (45)    |         |
| Migraine, without TTH              |                    | 0 (0)                 | 137 (21)   | 78 (20)    | 19 (22)    |         |
| Migraine, with TTH                 |                    | 0 (0)                 | 24 (4)     | 43 (11)    | 22 (25)    |         |
| Migraine, with visual aura         | 134                | 0 (0)                 | 64 (10)    | 54 (14)    | 16 (18)    |         |
| Other headaches                    |                    | 0 (0)                 | 31 (5)     | 15 (4)     | 7 (8)      | <0.001  |
| Age, mean (SD), y                  | 3832               | 15.8 (1.7)            | 15.9 (1.7) | 16.1 (1.8) | 16.0 (1.7) | 0.02¶   |
| Family Structure, No. (%)          | 3798               |                       |            |            |            |         |
| Living w/ both parents             |                    | 1819 (68)             | 396 (61)   | 216 (57)   | 42 (48)    |         |
| Other                              |                    | 865 (32)              | 250 (39)   | 165 (43)   | 45 (52)    | <0.001  |
| Family Economy, No. (%)            | 3630               |                       |            |            |            |         |
| Above average                      |                    | 413 (16)              | 77 (13)    | 57 (16)    | 8 (10)     |         |
| Average                            |                    | 1946 (76)             | 456 (75)   | 252 (69)   | 62 (73)    |         |
| Below average                      |                    | 215 (8)               | 74 (12)    | 55 (15)    | 15 (18)    | <0.001  |
| Sum of PTIE‡, No. (%)              | 3662               |                       |            |            |            |         |
| 0                                  |                    | 2031 (78)             | 423 (68)   | 226 (61)   | 47 (56)    |         |
| 1                                  |                    | 382 (15)              | 119 (19)   | 69 (19)    | 22 (26)    |         |
| 2                                  |                    | 108 (4)               | 50 (8)     | 39 (11)    | 5 (6)      |         |
| ≥3                                 |                    | 68 (3)                | 28 (5)     | 35 (9)     | 10 (12)    | <0.001  |
| Psychological Distress§, mean (SD) | 3740               | 1.6 (0.5)             | 1.8 (0.6)  | 2.0 (0.7)  | 2.0 (0.7)  | <0.001¶ |

**Male**

|                                    |      |            |            |            |            |         |
|------------------------------------|------|------------|------------|------------|------------|---------|
| Headache, No. (%)                  | 3788 | 3204 (85)  | 418 (11)   | 145 (4)    | 21 (1)     |         |
| TTH                                |      | 0 (0)      | 324 (78)   | 98 (68)    | 13 (62)    |         |
| Migraine, without TTH              |      | 0 (0)      | 70 (17)    | 25 (17)    | 2 (10)     |         |
| Migraine, with TTH                 |      | 0 (0)      | 9 (2)      | 12 (8)     | 4 (19)     |         |
| Migraine, with visual aura         | 72   | 0 (0)      | 47 (11)    | 23 (16)    | 2 (10)     |         |
| Other headaches                    |      | 0 (0)      | 15 (4)     | 10 (7)     | 2 (9)      | <0.001  |
| Age, mean (SD), y                  | 3788 | 15.8 (1.7) | 15.7 (1.7) | 15.7 (1.6) | 15.8 (2.1) | 0.60¶   |
| Family Structure, No. (%)          | 3748 |            |            |            |            |         |
| Living w/ both parents             |      | 2206 (70)  | 273 (66)   | 85 (60)    | 12 (60)    |         |
| Other                              |      | 968 (30)   | 139 (34)   | 57 (40)    | 8 (40)     | 0.05    |
| Family Economy, No. (%)            | 3465 |            |            |            |            |         |
| Above average                      |      | 614 (21)   | 82 (22)    | 26 (20)    | 0 (0)      |         |
| Average                            |      | 2107 (72)  | 262 (69)   | 89 (67)    | 12 (63)    |         |
| Below average                      |      | 211 (7)    | 38 (10)    | 17 (13)    | 7 (37)     | <0.001  |
| Sum of PTIEs‡ No. (%)              | 3527 |            |            |            |            |         |
| 0                                  |      | 2023 (68)  | 244 (64)   | 70 (53)    | 9 (50)     |         |
| 1                                  |      | 622 (21)   | 67 (17)    | 31 (24)    | 4 (22)     |         |
| 2                                  |      | 255 (9)    | 49 (13)    | 18 (14)    | 3 (17)     |         |
| ≥3                                 |      | 95 (3)     | 23 (6)     | 12 (9)     | 2 (11)     | <0.001  |
| Psychological Distress§, mean (SD) | 3617 | 1.3 (0.4)  | 1.5 (0.5)  | 1.5 (0.6)  | 1.9 (0.7)  | <0.001¶ |

Abbreviations: PTIE, Potentially Traumatic Interpersonal Event; TTH, Tension-type headache.

\* Recurrent headache is defined as headache ≥ monthly.

† Because of rounding percentages may not total 100.

‡ Exposure to PTIEs is measured as the sum of 5 binary exposure-variables.

§ Range of possible score is 1 to 4.

|| Pearson Chi square test.

¶ ANONVA, analysis of variance.

1  
2  
3 Generally, twice as many girls as boys reported recurrent headache and girls reported  
4  
5 increasing complaints with increasing age. The prevalence rate of recurrent monthly  
6  
7 headache was 22%, including 16% who reported tension-type headache (TTH), and 6% who  
8  
9 reported migraines (4.5% reported only migraine and another 1.5% reported migraine with  
10  
11 TTH). About two thirds of adolescents with only TTH or migraine reported monthly  
12  
13 recurrence, whilst those with combined migraine and TTH headache mostly reported weekly  
14  
15 or daily complaints. Despite sex differences in headache prevalence, the socio-demographic  
16  
17 distribution of recurrent headache followed similar patterns for both sexes, linking living in  
18  
19 'other' family structures and having a family economy 'below average' with recurrent  
20  
21 headaches.  
22  
23  
24  
25

26  
27 In the present study 26% of girls and 33% of boys reported exposure to one or more  
28  
29 types of potentially traumatic events, whilst 4% of both sexes reported 3 or more  
30  
31 victimizations. Amongst adolescents reporting no recurrent headache complaints 73%  
32  
33 reported no victimizations, whilst 18% reported exposure to one PTIE, and 9% reported  
34  
35 exposure to two or more PTIEs. The reported level of exposure to PTIEs seemed to increase  
36  
37 across frequencies of headache complaints for both sexes, with the highest victimization  
38  
39 observed amongst adolescents with chronic daily headaches, of whom only 55% reported no  
40  
41 exposure, 25% reported exposure to 1 PTIE and 20% reported exposure to two or more  
42  
43 PTIEs. Mean score for psychological distress was 1.49 ( $\pm 0.55$ ) (SCL-5), and increasing distress  
44  
45 was significantly associated with recurrent headache complaints, as assessed in univariate  
46  
47 analysis.  
48  
49  
50  
51

52  
53 A multiple logistic regression analysis adjusted for sociodemographic factors, revealed a  
54  
55 steady trend of increasing odds for recurrent headache with increasing exposure to PTIEs  
56  
57 (Table 2, Model 1).  
58  
59  
60

**Table 2.** Recurrent Headache in Relation to Exposure to PTIEs, Sociodemography and Psychological Distress, by Sex\*\*‡.

| Variables                  | No.  | Recurrent Headache,<br>(n=1514) |                      |                                       |                      |                      |                                       |
|----------------------------|------|---------------------------------|----------------------|---------------------------------------|----------------------|----------------------|---------------------------------------|
|                            |      | Female<br>(n=1021)              |                      |                                       | Male<br>(n=496)      |                      |                                       |
|                            |      | Model 1                         | Model 2              | Model 2/1                             | Model 1              | Model 2              | Model 2/1                             |
|                            |      | OR <sub>1</sub> (CI)            | OR <sub>2</sub> (CI) | OR <sub>2</sub> /OR <sub>1</sub> (CI) | OR <sub>1</sub> (CI) | OR <sub>2</sub> (CI) | OR <sub>2</sub> /OR <sub>1</sub> (CI) |
| Sum of PTIEs               |      |                                 |                      |                                       |                      |                      |                                       |
| 0                          | 4789 | 1 [Reference]                   | 1 [Reference]        |                                       | 1 [Reference]        | 1 [Reference]        |                                       |
| 1                          | 1250 | 1.46 (1.20-1.78)                | 1.25 (1.02-1.53)     | 0.86 (0.82-0.90)                      | 1.04 (0.81-1.34)     | 0.93 (0.72-1.20)     | 0.89 (0.85-0.93)                      |
| 2                          | 496  | 2.28 (1.69-3.08)                | 1.73 (1.27-2.36)     | 0.76 (0.69-0.82)                      | 1.71 (1.25-2.33)     | 1.41 (1.03-1.94)     | 0.83 (0.76-0.88)                      |
| ≥3                         | 252  | 2.61 (1.82-3.75)                | 1.69 (1.15-2.47)     | 0.65 (0.57-0.73)                      | 2.29 (1.49-3.52)     | 1.57 (1.00-2.47)     | 0.69 (0.59-0.78)                      |
| Overall p-value            |      | <0.001                          | <0.001               |                                       | <0.001               | 0.029                |                                       |
| Age                        | 6787 | 1.05 (1.00-1.09)                | 1.02 (0.98-1.07)     |                                       | 0.95 (0.89-1.00)     | 0.93 (0.87-0.98)     |                                       |
| Family Structure           |      |                                 |                      |                                       |                      |                      |                                       |
| Living w/mother and father | 4572 | 1 [Reference]                   | 1 [Reference]        |                                       | 1 [Reference]        | 1 [Reference]        |                                       |
| Other                      | 2215 | 1.27 (1.09-1.49)                | 1.22 (1.04-1.43)     |                                       | 1.29 (1.05-1.58)     | 1.26 (1.03-1.55)     |                                       |

## Family Economy

|                        |      |                  |                  |                  |                  |
|------------------------|------|------------------|------------------|------------------|------------------|
| Above average          | 1214 | 1 [Reference]    | 1 [Reference]    | 1 [Reference]    | 1 [Reference]    |
| Average                | 4966 | 1.16 (0.94-1.44) | 1.23 (0.99-1.53) | 0.93 (0.73-1.18) | 0.95 (0.75-1.21) |
| Below Average          | 607  | 1.61 (1.19-2.17) | 1.41 (1.04-1.92) | 1.36 (0.94-1.97) | 1.10 (0.75-1.60) |
| Psychological Distress | 6787 |                  | 1.94 (1.70-2.22) |                  | 2.10 (1.72-2.58) |

Abbreviations: CI, 95% Confidence Interval; OR<sub>1</sub>, Odds Ratio for Regression Model 1; OR<sub>2</sub>, Odds Ratio for Regression Model 2; PTIE, Potentially Traumatic Interpersonal Event.

\* Study definitions and measures are explained in footnotes to Table 1.

† Analyses were restricted to adolescents without missing values, (3494 females and 3293 males).

‡ All regression models are adjusted for age, family structure and family economy. Model 2 is additionally adjusted for psychological distress. Mediation by psychological distress is tested through analysis of ratio of odds ratio (Model 2/Model 1 = OR<sub>1</sub> /OR<sub>2</sub>) with bootstrap 95% percentile confidence intervals presented, 10 000 replications.

1  
2  
3 The direct effect of exposure to PTIEs decreased after the hypothesized mediator,  
4 psychological distress, was entered into the regression equation (Table 2, Model 2).  
5  
6 Bootstrap confidence intervals for the magnitude of this attenuation in OR when entering  
7 psychological distress in the regression equation  $(1 - (OR_2 / OR_1))$  (Model2/1), indicated a  
8 significant reduction in ORs. Moreover, the magnitude of attenuation in OR increased with  
9 increasing exposure.  
10  
11  
12  
13  
14  
15  
16  
17

18 Similarly, when investigating the association between trauma exposure and headache  
19 by 'monthly', 'weekly', and 'daily' recurrence, respectively, a significant and cumulative  
20 association was found (Model 1, Table 3). Further, for all frequencies of recurrent headache  
21 as outcomes, we found a significant and cumulative attenuation in ORs when introducing  
22 psychological distress as a potential mediator in analyses (Model 2). The associations were  
23 significantly stronger between PTIEs and weekly or more frequent headache, as compared to  
24 monthly complaints, although differences in strength of associations leveled out when  
25 entering psychological distress, as the potential mediator, in the logistic regression analysis  
26 (supplementary table A3, online only).  
27  
28  
29  
30  
31  
32  
33  
34  
35  
36  
37  
38  
39  
40  
41  
42  
43  
44  
45  
46  
47  
48  
49  
50  
51  
52  
53  
54  
55  
56  
57  
58  
59  
60

**Table 3.** Recurrent Headache in Relation to Exposure to PTIEs, by Frequency of Recurrent Headache Complaints\*†‡.

|                 |      | Recurrent Headache,<br>(n=1514) |                      |                                       |                             |                      |                                       |                            |                      |                                       |
|-----------------|------|---------------------------------|----------------------|---------------------------------------|-----------------------------|----------------------|---------------------------------------|----------------------------|----------------------|---------------------------------------|
|                 |      | Monthly Headache,<br>(n=942)    |                      |                                       | Weekly Headache,<br>(n=472) |                      |                                       | Daily Headache,<br>(n=100) |                      |                                       |
| Variables       | No.  | Model 1                         | Model 2              | Model 2/1                             | Model 1                     | Model 2              | Model 2/1                             | Model 1                    | Model 2              | Model 2/1                             |
|                 |      | OR <sub>1</sub> (CI)            | OR <sub>2</sub> (CI) | OR <sub>2</sub> /OR <sub>1</sub> (CI) | OR <sub>1</sub> (CI)        | OR <sub>2</sub> (CI) | OR <sub>2</sub> /OR <sub>1</sub> (CI) | OR <sub>1</sub> (CI)       | OR <sub>2</sub> (CI) | OR <sub>2</sub> /OR <sub>1</sub> (CI) |
| Sum of PTIEs    |      |                                 |                      |                                       |                             |                      |                                       |                            |                      |                                       |
| 0               | 4789 | 1 [Reference]                   | 1 [Reference]        |                                       | 1 [Reference]               | 1 [Reference]        |                                       | 1 [Reference]              | 1 [Reference]        |                                       |
| 1               | 1250 | 1.17<br>(0.97-1.41)             | 1.05<br>(0.87-1.27)  | 0.90<br>(0.87-0.93)                   | 1.40<br>(1.08-1.81)         | 1.18<br>(0.91-1.53)  | 0.85<br>(0.80-0.89)                   | 2.03<br>(1.23-3.36)        | 1.58<br>(0.95-2.64)  | 0.78<br>(0.70-0.86)                   |
| 2               | 496  | 1.77<br>(1.37-2.28)             | 1.46<br>(1.12-1.90)  | 0.83<br>(0.78-0.87)                   | 2.46<br>(1.77-3.41)         | 1.78<br>(1.26-2.50)  | 0.72<br>(0.65-0.79)                   | 1.93<br>(0.89-4.20)        | 1.17<br>(0.52-2.63)  | 0.61<br>(0.48-0.73)                   |
| ≥3              | 252  | 1.74<br>(1.22-2.48)             | 1.30<br>(0.90-1.87)  | 0.74<br>(0.67-0.81)                   | 3.80<br>(2.61-5.54)         | 2.18<br>(1.45-3.27)  | 0.57<br>(0.49-0.66)                   | 4.53<br>(2.26-9.07)        | 2.03<br>(0.95-4.34)  | 0.45<br>(0.32-0.60)                   |
| Overall p-value |      | <0.001                          | 0.028                |                                       | <0.001                      | <0.001               |                                       | <0.001                     | 0.164                |                                       |

|                        |      |             |             |             |             |             |             |
|------------------------|------|-------------|-------------|-------------|-------------|-------------|-------------|
| Sex§                   | 6787 | 1.89        | 1.60        | 3.51        | 2.62        | 5.14        | 3.56        |
|                        |      | (1.64-2.19) | (1.38-1.87) | (2.82-4.37) | (2.09-3.30) | (3.06-8.64) | (2.09-6.07) |
| Psychological Distress |      |             | 1.71        |             | 2.24        |             | 2.78        |
|                        | 6787 |             | (1.50-1.95) |             | (1.90-2.63) |             | (2.03-3.80) |

Abbreviations: CI, 95% Confidence Interval; OR1, Odds Ratio for Regression Model 1; OR2, Odds Ratio for Regression Model 2; PTIE, Potentially Traumatic Interpersonal Event.

\* Study definitions and measures are defined in footnotes to Table 1.

† Analyses were restricted to adolescents without missing values, (n=6787).

‡ All models are adjusted for sex, age, family structure and family economy. Model 2 is additionally adjusted for psychological distress. Mediation by psychological distress is tested through analysis of ratio of odds ratio (Model2/Model1= OR2 /OR1) with bootstrap 95% percentile confidence intervals presented, 10 000 replications.

§ Male is reference category

The association between exposure to PTIEs and subtypes of recurrent headache followed a similar pattern. Tension-type headache, simple migraine, migraine with tension-type headache, and 'other' headaches were all significantly and cumulatively associated with exposure to PTIEs (Model 1, Table 4). Adding psychological distress as a mediator in regression Model 2 for all four subtypes of recurrent headache yielded



1  
2  
3 a significant reduction in OR ( $1 - OR_2 / OR_1$ ) for all analyses. The association between  
4  
5 traumatic events and recurrent headache was significantly stronger amongst those reporting  
6  
7 any migraine in comparison to tension-type headache only (supplementary table A4, online  
8  
9 only). This observed difference between groups was mainly driven by a stronger association  
10  
11 between exposure to trauma and combined migraine with TTH, as opposed to TTH only. We  
12  
13 found no significant differences in associations to victimization between the two groups of  
14  
15 migraine only versus combined migraine and TTH headaches.  
16  
17  
18  
19  
20  
21  
22  
23  
24  
25  
26  
27  
28  
29  
30  
31  
32  
33  
34  
35  
36  
37  
38  
39  
40  
41  
42  
43  
44  
45  
46  
47  
48  
49  
50  
51  
52  
53  
54  
55  
56  
57  
58  
59  
60

**Table 4.** Recurrent Headache in Relation to Exposure to PTIEs, by Type of Headache Complaints\*†‡.

|                        |      | Recurrent Headache,<br>(n=1514) |                                 |                                                    |                                 |                                 |                                                    |
|------------------------|------|---------------------------------|---------------------------------|----------------------------------------------------|---------------------------------|---------------------------------|----------------------------------------------------|
|                        |      | TTH, only<br>(n=1048)           |                                 |                                                    | Migraine, only<br>(n=293)       |                                 |                                                    |
| Variables              | No.  | Model 1<br>OR <sub>1</sub> (CI) | Model 2<br>OR <sub>2</sub> (CI) | Model 2/1<br>OR <sub>1</sub> /OR <sub>2</sub> (CI) | Model 1<br>OR <sub>1</sub> (CI) | Model 2<br>OR <sub>2</sub> (CI) | Model 2/1<br>OR <sub>1</sub> /OR <sub>2</sub> (CI) |
| Sum of PTIEs           |      |                                 |                                 |                                                    |                                 |                                 |                                                    |
| 0                      | 4789 | 1 [Reference]                   | 1 [Reference]                   |                                                    | 1 [Reference]                   | 1 [Reference]                   |                                                    |
| 1                      | 1250 | 1.16<br>(0.97-1.39)             | 1.01<br>(0.84-1.22)             | 0.87<br>(0.84-0.90)                                | 1.59<br>(1.17-2.17)             | 1.40<br>(1.02-1.92)             | 0.88<br>(0.83-0.92)                                |
| 2                      | 496  | 1.71<br>(1.34-2.20)             | 1.35<br>(1.04-1.75)             | 0.79<br>(0.74-0.84)                                | 2.26<br>(1.48-3.44)             | 1.76<br>(1.14-2.72)             | 0.78<br>(0.69-0.86)                                |
| ≥3                     | 252  | 2.12<br>(1.54-2.92)             | 1.42<br>(1.02-1.99)             | 0.67<br>(0.60-0.74)                                | 3.39<br>(2.10-5.48)             | 2.19<br>(1.31-3.66)             | 0.65<br>(0.54-0.76)                                |
| Overall p-value        |      | <0.001                          | 0.034                           |                                                    | <0.001                          | 0.003                           |                                                    |
| Sex§                   | 6787 | 2.10<br>(1.83-2.42)             | 1.71<br>(1.47-1.97)             |                                                    | 3.08<br>(2.36-4.02)             | 2.49<br>(1.88-3.28)             |                                                    |
| Psychological distress | 6787 |                                 | 1.95<br>(1.72-2.21)             |                                                    |                                 | 1.83<br>(1.49-2.25)             |                                                    |
|                        |      | Migraine w/ TTH,<br>(n=104)     |                                 |                                                    | Other Headache,<br>(n=69)       |                                 |                                                    |
| Variables              | No.  | Model 1<br>OR <sub>1</sub> (CI) | Model 2<br>OR <sub>2</sub> (CI) | Model 2/1<br>OR <sub>1</sub> /OR <sub>2</sub> (CI) | Model 1<br>OR <sub>1</sub> (CI) | Model 2<br>OR <sub>2</sub> (CI) | Model 2/1<br>OR <sub>1</sub> /OR <sub>2</sub> (CI) |

Sum of PTIEs

|                        |      |                      |                     |                     |                     |                     |                     |
|------------------------|------|----------------------|---------------------|---------------------|---------------------|---------------------|---------------------|
| 0                      | 4789 | 1 [Reference]        | 1 [Reference]       |                     | 1 [Reference]       | 1 [Reference]       |                     |
| 1                      | 1250 | 1.64<br>(0.98-2.76)  | 1.38<br>(0.82-2.33) | 0.84<br>(0.77-0.91) | 1.62<br>(0.88-2.97) | 1.40<br>(0.76-2.58) | 0.86<br>(0.77-0.96) |
| 2                      | 496  | 3.72<br>(2.04-6.76)  | 2.46<br>(1.32-4.60) | 0.66<br>(0.54-0.79) | 3.26<br>(1.60-6.63) | 2.45<br>(1.17-5.11) | 0.75<br>(0.59-0.92) |
| ≥3                     | 252  | 6.08<br>(3.16-11.70) | 3.36<br>(1.66-6.77) | 0.55<br>(0.42-0.70) | 1.69<br>(0.50-5.68) | 1.08<br>(0.31-3.78) | 0.64<br>(0.39-0.89) |
| Overall p-value        |      | <0.001               | 0.002               |                     | 0.011               | 0.113               |                     |
| Sex§                   | 6787 | 4.73<br>(2.91-7.68)  | 3.38<br>(2.05-5.57) |                     | 2.94<br>(1.73-5.00) | 2.31<br>(1.33-4.01) |                     |
| Psychological distress |      |                      | 2.41                |                     |                     | 1.95                |                     |
|                        | 6787 |                      | (1.77-3.27)         |                     |                     | (1.31-2.88)         |                     |

Abbreviations: CI, 95% Confidence Interval; OR<sub>1</sub>, Odds Ratio for Regression Model 1; OR<sub>2</sub>, Odds Ratio for Regression Model 2;

PTIE, Potentially Traumatic Interpersonal Event; TTH, Tension-type Headache.

\* Study definitions and measures are defined in footnotes to Table 1.

† Analyses were restricted to adolescents without missing values, (n=6787).

‡ Model 1 is adjusted for sex, age, family structure and family economy. Model 2 is adjusted for psychological distress, sex, age, family structure and family economy. Mediation by psychological distress is evaluated through analysis of ratio of odds ratio (Model 2/Model 1 = OR<sub>1</sub> /OR<sub>2</sub>) with bootstrap 95% percentile confidence intervals presented, 10 000 replications.

§ Male is reference category

Furthermore, in subgroup analysis, investigating the role of posttraumatic stress reactions as a potential additional mediator of the relationship between victimization and recurrent headache, posttraumatic stress independently and significantly attenuated ORs. Nonetheless, the additional contribution of posttraumatic stress, when we also accounted for general psychological distress, was insignificant (Table 5).

**Table 5.** Recurrent Headache in Relation to Exposure to PTIEs, adjusted for Psychological Distress and Posttraumatic Stress Reactions\*†‡.

| Variables                      | No.  | Recurrent Headache,<br>(n=487) |                      |                                         |                      |                                         |                      |                                         |
|--------------------------------|------|--------------------------------|----------------------|-----------------------------------------|----------------------|-----------------------------------------|----------------------|-----------------------------------------|
|                                |      | Model 1                        | Model 2a             | Model 2a /Model 1                       | Model 2b             | Model 2b /Model 1                       | Model 2c             | Model 2c /Model 1                       |
|                                |      | OR <sub>1</sub> (CI)           | OR <sub>2</sub> (CI) | OR <sub>2</sub> /OR <sub>1</sub> , (CI) | OR <sub>2</sub> (CI) | OR <sub>2</sub> /OR <sub>1</sub> , (CI) | OR <sub>2</sub> (CI) | OR <sub>2</sub> /OR <sub>1</sub> , (CI) |
| Sum of PTIEs                   |      |                                |                      |                                         |                      |                                         |                      |                                         |
| 1                              | 1055 | 1 [Reference]                  | 1 [Reference]        |                                         | 1 [Reference]        |                                         | 1 [Reference]        |                                         |
| 2                              | 459  | 1.59(1.23-2.05)                | 1.46(1.13-1.89)      | 0.92 (0.87-0.96)                        | 1.52(1.18-1.97)      | 0.96 (0.92-0.99)                        | 1.44(1.11-1.87)      | 0.91 (0.85-0.96)                        |
| ≥3                             | 226  | 2.15(1.57-2.94)                | 1.69(1.21-2.35)      | 0.79 (0.71-0.86)                        | 1.91(1.39-2.64)      | 0.89 (0.82-0.96)                        | 1.63(1.17-2.27)      | 0.76 (0.67-0.84)                        |
| Overall p-value                |      | <0.001                         | 0.001                |                                         | <0.001               |                                         | 0.002                |                                         |
| Sex§                           | 1740 | 3.01 (2.40-3.77)               | 2.44 (1.93-3.10)     |                                         | 2.60 (2.06-3.30)     |                                         | 2.29(1.80-2.92)      |                                         |
| Psychological distress         |      |                                | 1.68(1.40-2.01)      |                                         |                      |                                         | 1.57(1.30-1.91)      |                                         |
| Posttraumatic Stress Reactions |      |                                |                      |                                         |                      |                                         |                      |                                         |
| 0                              | 792  |                                |                      |                                         | 1 [Reference]        |                                         | 1 [Reference]        |                                         |
| 1                              | 417  |                                |                      |                                         | 1.13(0.84-1.51)      |                                         | 1.08(0.81-1.45)      |                                         |
| 2                              | 298  |                                |                      |                                         | 1.64(1.20-2.24)      |                                         | 1.45(1.05-1.99)      |                                         |

|                 |     |                 |                 |
|-----------------|-----|-----------------|-----------------|
| 3               | 233 | 1.78(1.26-2.50) | 1.36(0.95-1.96) |
| Overall p-value |     | 0.001           | 0.100           |

Abbreviations: CI, 95% Confidence Interval; OR1, Odds Ratio for Regression Model 1; OR2, Odds Ratio for Regression Model 2; PTIE, Potentially Traumatic Interpersonal Event.

\* Study definitions and measures are defined in footnotes to Table 1.

† Analyses were restricted to adolescents exposed to  $\geq 1$  PTIE, without missing values for any of the included variables, n=1740 (946 males and 794 females).

‡ All models are adjusted for sex, age, family structure and family economy. Model 2a is additionally adjusted for psychological distress, Model 2b for posttraumatic stress reactions and Model 2c for both psychological distress and posttraumatic stress reactions. Mediation by psychological distress and/or posttraumatic stress reactions is evaluated through analysis of ratios of odds ratios (Model 2a-c/Model 1) with bootstrap 95% percentile confidence intervals presented, 10 000 replications.

§ Male is reference category

## DISCUSSION

To our knowledge this is the first population-based study to comprehensively assess associations between exposure to multiple victimization and recurrent headache, meeting the ICHD-II criteria. The main findings were firstly, documentation of a strong and consistent relationship between exposure to potentially traumatic interpersonal events (PTIEs) and recurrent headaches experienced by adolescents, regardless of frequency of complaints. Secondly, a similar, robust pattern was found across all major subtypes of complaints. Thirdly, a cumulative increase in strengths of associations was observed for all frequencies and main subtypes with increasing victimization, indicating a dose-response relationship. Last, the observed dependency between trauma exposure, general psychological distress and all recurrent headaches possibly reflect the role of psychological distress as a mediator on the pathway linking exposure to PTIEs and recurrent headache complaints. This mediating role of psychological distress on the relationship between trauma exposure and recurrent headache consistently amplified with sum of exposure to PTIEs for all frequencies and main subtypes of headache complaints. Posttraumatic stress reactions seemed to play a similar mediating role in subgroup analysis, although adjustment for general distress leveled out it's specific effect. This may indicate that general psychological distress, as measured within this study, to some degree encompassed posttraumatic stress reactions.[42]

The strengths of this study were the large sample size, the overall high participation rate, the use of a validated headache interview based upon the International Classification of Headache Disorder (II) criteria,[39] and the opportunity to assess the impact of several types of victimization and confounding factors, within a population based cohort of adolescents.

1  
2  
3 Although our findings indicate that exposure to trauma may be a causal factor in the  
4  
5  
6  
7  
8  
9  
10  
11  
12  
13  
14  
15  
16  
17  
18  
19  
20  
21  
22  
23  
24  
25  
26  
27  
28  
29  
30  
31  
32  
33  
34  
35  
36  
37  
38  
39  
40  
41  
42  
43  
44  
45  
46  
47  
48  
49  
50  
51  
52  
53  
54  
55  
56  
57  
58  
59  
60

Although our findings indicate that exposure to trauma may be a causal factor in the  
chronification of headache disorders, our retrospective, cross-sectional study-design did not  
allow for causal inference, and findings should thus be interpreted within the given  
constraints of the study.

The lower participation and response rate among adolescents who were out of  
school, and among those in senior high school compared with junior high school, represent a  
possible selection bias. We also found that young adolescents, boys, and adolescents not  
living with both parents were less likely to respond to the items regarding victimization.  
These possible selection biases may have led to an underestimation of the associations.[46]  
A validated, comprehensive measure of trauma exposure would have strengthened the  
study, as would a validated measure of headache related functional impairment.[24]

Prevalence rates of recurrent headache, including frequencies and subtypes of  
complaints, were in large unchanged in comparison with national headache prevalence rates  
from 1995-1997,[47] and in the lower range of aggregated international estimates.[6] As  
previously documented prevalence rates were doubled in girls as compared to boys, rose  
steadily with age throughout adolescence in females, whilst flattening out in males,[6] and  
were higher in adolescents reporting psychological distress,[2 4 10 19] living without both  
parents,[20] or within family economies below average.[2 16] Although overall comparison  
of traumatization across measures and populations is difficult the observed prevalence rates  
and patterns of distribution of exposure in our study complied with that reported elsewhere,  
although in the lower range.[28 33] Regarding levels of psychological distress screening  
estimates were in correspondence with previous national and international findings.[42 48]

1  
2  
3 Our main finding of a strong, consistent and cumulative relationship between  
4 exposure to interpersonal trauma and recurrent headache in a general adolescent  
5 population, complies with recent but scarce evidence provided by cross-sectional population  
6 studies of adolescents, of which two studies used the ICHD-II criteria.[14 21 23 25] Further  
7 results are in coherence with one population-based,[49] two clinical,[27 50] and another two  
8 convenience-sample[26 51] retrospective, cross-sectional studies of adults, of which one  
9 used the ICHD-II criteria.[27] Apart from one adolescent study which examined girls only,[14]  
10 and the adult convenience sample study,[26] the sample-size in these studies were smaller  
11 in comparison to the present study. Generally the adolescent studies assessed exposure to  
12 one type of trauma exposure only, whilst the adult studies looked specifically at child abuse  
13 and family dysfunction.  
14  
15  
16  
17  
18  
19  
20  
21  
22  
23  
24  
25  
26  
27

28  
29 In regard to the question of temporality of associations, a large cohort study using  
30 follow-up data over 12 years of adolescent and adult Canadians recently found childhood  
31 adversity and depression to be significant predictors of adult migraine.[38] Additionally,  
32 observational, prospective, convenience sample studies of adolescents exposed to bullying  
33 lend evidence to the more general relationship between victimization and psychosomatic  
34 complaints, although headache measurements in these studies were too imprecise to draw  
35 more specific conclusions of associations.[52-54] Taken together, scarce evidence suggests  
36 that victimization may be an important factor on the causal pathway leading to onset and  
37 chronification of headache disorder.  
38  
39  
40  
41  
42  
43  
44  
45  
46  
47  
48

49  
50 Amongst the observed relationships between trauma exposure and main subtypes of  
51 headache migraine was most strongly linked to victimization. This discrepancy between  
52 tension-type headache and migraine seemed to be explained largely by the stronger  
53 association between trauma exposure and combined migraine with tension-type complaints.  
54  
55  
56  
57  
58  
59  
60



1  
2  
3 These findings may reflect a pattern where exposure to interpersonal trauma predispose for  
4  
5 more severe headache complaints, and comorbidity in the form of multiple types of  
6  
7 pains,[55] reflecting a similar pattern as that observed in the relationship between trauma  
8  
9 exposure and psychopathology.[29] Such an interpretation complies with previous findings  
10  
11 that both migraines in general, and combined migraines and tension-type headaches  
12  
13 specifically, tend to be clinically more severe and disabling in comparison to other primary  
14  
15 headache disorders.[18 19] On the other hand the observed discrepancies in strength of  
16  
17 associations between PTIEs and subtypes of headaches may be an artefact of underlying  
18  
19 chronification of complaints, as combined migraine and tension-type headache was more  
20  
21 often experienced weekly or daily as opposed to migraine or TTH only which mostly recurred  
22  
23 monthly.  
24  
25  
26  
27

28  
29 In this study we found psychological distress to be one plausible mediator via which  
30  
31 traumatic experiences may increase the risk of chronification of headache complaints in  
32  
33 adolescents. This finding complies with current pathophysiological understanding, where  
34  
35 violence as an environmental stressor, may acutely or over time overwhelm, exhaust and  
36  
37 further dysregulate the stress response system.[56] Pathological effects, such as recurrent  
38  
39 headache, though initially induced by external trauma, may largely be related to persistence  
40  
41 of physiological distress functioning as an internal stressor that triggers cerebral sensitization  
42  
43 and hypersensitivity through alterations of shared neuroendoimmunological pathways of  
44  
45 emotion and pain, which in turn may lead to hyperalgesia and chronification of headache  
46  
47 disorders.[3 9 17 57] Future interdisciplinary studies need to explore these suggested  
48  
49 pathways to enable tailored interventions.  
50  
51  
52  
53

54  
55 Sex differences in the strength of associations between PTIEs and recurrent headache  
56  
57 may be related to the gender-biased qualitative differences of reported PTIEs, such as girls  
58  
59  
60

1  
2  
3 being more prone to sexual abuse and exposure within their social networks.[37] Such  
4  
5 exposure is associated with worse health outcomes, which are possibly related to the  
6  
7 developmental stage at the time of abuse, proximity to the perpetrator, and the persistence  
8  
9 and severity of the abuse.[31 58] Other possible mechanisms may be related to  
10  
11 developmental biological differences, or sociocultural gender role expectations affecting  
12  
13 reaction patterns,[59] predisposing girls to internalizing as opposed to externalizing  
14  
15 behaviour, which in turn increase their susceptibility of experiencing persistent chronic  
16  
17 pain.[60]  
18  
19  
20  
21  
22  
23

## 24 **Conclusion and implications**

25  
26 Our main findings comply with essential features of current theoretical models of  
27  
28 developmental psychopathology,[61] recurrent pain [60] and chronic pediatric headache [3  
29  
30 17] that underscore the need for a biopsychosocial approach to understand adverse health  
31  
32 outcomes in childhood. Knowing that recurrent headaches are amongst the most common  
33  
34 causes of disability in adults and adolescents alike,[1 18] substantiated empirical evidence of  
35  
36 a strong, consistent and cumulative relationship between exposure to trauma, psychological  
37  
38 distress and recurrent headache, regardless of subtype, demands for further investigation.  
39  
40 [23] We are currently at a stage where we recognize that childhood trauma, abuse and  
41  
42 adversities do little good for psychological and somatic health and development, and yet we  
43  
44 lack valid, distinct and precise knowledge to guide public health interventions and clinical  
45  
46 practice. Thus, primarily there is a need for more comprehensive, interdisciplinary research,  
47  
48 preferably prospective, using valid measurements of risk factors and clinically applicable  
49  
50 outcome-measures, aiming to identify underlying gene-environment interactions or  
51  
52 biopsychosocial causal pathways as targets of tailored prevention and intervention. Secondly,  
53  
54  
55  
56  
57  
58  
59  
60

1  
2  
3 from a more general public health perspective, the observed dependency between trauma  
4  
5 exposure and highly prevalent psychological and somatic conditions challenges the  
6  
7 traditional dichotomization of health services, requiring establishment and maintenance of  
8  
9 low-threshold, local health services directed toward adolescents that integrate psychological  
10  
11 and somatic needs.[62-64]  
12  
13  
14  
15  
16  
17  
18  
19  
20  
21  
22  
23  
24  
25  
26  
27  
28  
29  
30  
31  
32  
33  
34  
35  
36  
37  
38  
39  
40  
41  
42  
43  
44  
45  
46  
47  
48  
49  
50  
51  
52  
53  
54  
55  
56  
57  
58  
59  
60

For peer review only

**CONTRIBUTORSHIP**

Contributors: SØS carried out the data processing, analysed the data, drafted and revised the paper. She is the guarantor. GD and JAZ contributed to the intergration of the headache interview, measures of victimization and posttraumatic distress in the Young-HUNT3 Study. GD and ST wrote the original study protocol, applied for and received the grant for the study, and further participated in the epidemiological modelling, analysis and writing of the manuscript. TWL contributed to the statistical analysis. JAZ participated in the design of the study and helped to write the manuscript. All authors have read and approved the final version of the manuscript.

**ACKNOWLEDGEMENTS**

We would like to thank the adolescents participating in the HUNT Study and the HUNT research centre for their collaboration. Further we would like to thank Professor Dean G.Kilpatrick for his useful comments on the manuscript.

**COMPETING INTERESTS/DISCLOSURE**

None declared. Synne Ø.Stensland, Grete Dyb, Siri Thoresen, Tore Wentzel-Larsen and John-Anker Zwart report no competing interests. All authors have completed the BMJ declaration of competing interests and the Unified Competing Interest form (available on request from the corresponding author) and declare that S. Stensland has support from The Norwegian Council for Mental Health, The Norwegian ExtraFoundation for Health and Rehabilitation for the submitted work; (2) none have relationships with companies that might have an interest in the submitted work in the previous 5 years; (3) their spouses, partners, or children have no financial relationships that may be relevant to the submitted work; and (4) the authors have no non-financial interests that may be relevant to the submitted work.

**ACCESS AND INTEGRITY OF ALL AUTHORS**

All authors had full access to all of the data (including statistical reports and tables) in the study and can take full responsibility for the integrity of the data and the accuracy of the data analysis.

## FUNDING

This work was supported by the Norwegian Centre for Violence and Traumatic Stress Studies and with a grant from The Norwegian Council for Mental Health, The Norwegian ExtraFoundation for Health and Rehabilitation, grant number 2009/2/0023. The Nord-Trøndelag Health Study (The HUNT Study), which is a collaboration between HUNT Research Centre (Faculty of Medicine, Norwegian University of Science and Technology NTNU), Nord-Trøndelag County Council, Central Norway Health Authority, and the Norwegian Institute of Public Health planned, organized and financed the data collection.

## ETHICS APPROVAL

Inclusion was based upon written consent from participants aged 16 years and older and from parents for those under 16, in accordance with Norwegian law. This study was approved by the Norwegian Regional Committee for Medical and Health Research Ethics.

## DATA SHARING STATEMENT

Data are available from the HUNT study <http://www.huntbiosciences.com/Cohorts/Diabetes/The-HUNT-Bio-And-Databank> The general health questionnaire and headache interview used in the study are accessible from the HUNT bio-and databank (<http://www.ntnu.edu/hunt/data/que>). There is no additional data available.

## THE ORIGINAL STUDY PROTOCOL

The original study protocol is accessible from the corresponding author, and may be translated from Norwegian to English on request .

1  
2  
3  
4  
5  
6  
7  
8  
9  
10  
11  
12  
13  
14  
15  
16  
17  
18  
19  
20  
21  
22  
23  
24  
25  
26  
27  
28  
29  
30  
31  
32  
33  
34  
35  
36  
37  
38  
39  
40  
41  
42  
43  
44  
45  
46  
47  
48  
49  
50  
51  
52  
53  
54  
55  
56  
57  
58  
59  
60

For peer review only

## REFERENCES

1. Roth-Isigkeit A, Thyen U, Stöven H, et al. Pain Among Children and Adolescents: Restrictions in Daily Living and Triggering Factors. *Pediatrics* 2005;115(2)
2. King S, Chambers CT, Huguet A, et al. The epidemiology of chronic pain in children and adolescents revisited: A systematic review. *Pain* 2011;152(12):2729-38
3. Seshia SS, Wang SJ, Abu-Arafeh I, et al. Chronic daily headache in children and adolescents: a multi-faceted syndrome. *Can. J. Neurol. Sci.* 2010;37(6):769-78
4. Dunn KM, Jordan KP, Mancl L, et al. Trajectories of pain in adolescents: a prospective cohort study. *Pain* 2011;152(1):66-73
5. Brna P, Dooley J, Gordon K, et al. The prognosis of childhood headache: a 20-year follow-up. *Arch. Pediatr. Adolesc. Med.* 2005;159(12):1157-60
6. Jensen R, Stovner LJ. Epidemiology and comorbidity of headache. *Lancet Neurol* 2008;7(4):354-61
7. Dyb G, Holmen TL, Zwart JA. Analgesic overuse among adolescents with headache: the Head-HUNT-Youth Study. *Neurology* 2006;66(2):198-201
8. Olesen J. The international classification of headache disorders, 2nd edition (ICHD-II). *Rev. Neurol. (Paris)*. 2005;161(6-7):689-91
9. Kelman L. The biological basis of headache. [Review]. *Expert review of neurotherapeutics* 2011;11 (3):363-78
10. Strine TW, Okoro CA, McGuire LC, et al. The associations among childhood headaches, emotional and behavioral difficulties, and health care use. *Pediatrics* 2006;117(5):1728-35
11. Lateef TM, Merikangas KR, He J, et al. Headache in a national sample of American children: prevalence and comorbidity. *J. Child Neurol.* 2009;24(5):536-43
12. Seifert TD, Evans RW. Posttraumatic headache: a review. *Curr Pain Headache Rep* 2010;14(4):292-8
13. Robberstad L, Dyb G, Hagen K, et al. An unfavorable lifestyle and recurrent headaches among adolescents: the HUNT study. *Neurology* 2010;75(8):712-7
14. Ghandour RM, Overpeck MD, Huang ZJ, et al. Headache, stomachache, backache, and morning fatigue among adolescent girls in the United States: associations with behavioral, sociodemographic, and environmental factors. *Arch. Pediatr. Adolesc. Med.* 2004;158(8):797-803
15. Lewandowski AS, Palermo TM, Stinson J, et al. Systematic Review of Family Functioning in Families of Children and Adolescents With Chronic Pain. *The Journal of Pain* 2010;11(11):1027-38
16. Holstein BE, Currie C, Boyce W, et al. Socio-economic inequality in multiple health complaints among adolescents: international comparative study in 37 countries. *International journal of public health* 2009;54 Suppl 2:260-70
17. Borsook D, Maleki N, Becerra L, et al. Understanding Migraine through the Lens of Maladaptive Stress Responses: A Model Disease of Allostatic Load. *Neuron* 2012;73(2):219-34
18. Merikangas KR, Cui L, Richardson AK, et al. Magnitude, impact, and stability of primary headache subtypes: 30 year prospective Swiss cohort study. *BMJ* 2011;343:d5076
19. Waldie KE, Poulton R. The burden of illness associated with headache disorders among young adults in a representative cohort study. *Headache* 2002;42(7):612-9
20. Bugdayci R, Ozge A, Sasmaz T, et al. Prevalence and factors affecting headache in Turkish schoolchildren. *Pediatr. Int.* 2005;47(3):316-22
21. Juang KD, Wang SJ, Fuh JL, et al. Association between adolescent chronic daily headache and childhood adversity: a community-based study. *Cephalalgia* 2004;24(1):54-9
22. Hensley L, Varela RE. PTSD symptoms and somatic complaints following Hurricane Katrina: the roles of trait anxiety and anxiety sensitivity. *J Clin Child Adolesc Psychol* 2008;37(3):542-52
23. Fuh JL, Wang SJ, Juang KD, et al. Relationship between childhood physical maltreatment and migraine in adolescents. *Headache* 2010;50(5):761-8
24. Zafar M, Kashikar-Zuck SM, Slater SK, et al. Childhood abuse in pediatric patients with chronic daily headache. *Clin. Pediatr. (Phila)*. 2012;51(6):590-3
25. Luntamo T, Sourander A, Rihko M, et al. Psychosocial determinants of headache, abdominal pain, and sleep problems in a community sample of Finnish adolescents. *Eur. Child Adolesc. Psychiatry* 2012;21(6):301-13
26. Anda R, Tietjen G, Schulman E, et al. Adverse childhood experiences and frequent headaches in adults. *Headache* 2010;50(9):1473-81

- 1
- 2
- 3 27. Tietjen GE, Brandes JL, Peterlin BL, et al. Childhood maltreatment and migraine (part I). Prevalence and
- 4 adult revictimization: a multicenter headache clinic survey. *Headache* 2010;50(1):20-31
- 5 28. Norman RE, Byambaa M, De R, et al. The long-term health consequences of child physical abuse,
- 6 emotional abuse, and neglect: a systematic review and meta-analysis. *PLoS Med*
- 7 2012;9(11):e1001349
- 8 29. Ford JD, Elhai JD, Connor DF, et al. Poly-victimization and risk of posttraumatic, depressive, and
- 9 substance use disorders and involvement in delinquency in a national sample of adolescents. *J.*
- 10 *Adolesc. Health* 2010;46(6):545-52
- 11 30. McLaughlin K, Greif Green J, Gruber MJ, et al. Childhood adversities and first onset of psychiatric
- 12 disorders in a national sample of us adolescents. *Arch. Gen. Psychiatry* 2012;69(11):1151-60
- 13 31. Zinzow HM, Ruggiero KJ, Resnick H, et al. Prevalence and mental health correlates of witnessed parental
- 14 and community violence in a national sample of adolescents. *Journal of Child Psychology and*
- 15 *Psychiatry* 2009;50(4):441-50
- 16 32. Fisher HL, Moffitt TE, Houts RM, et al. Bullying victimisation and risk of self harm in early adolescence:
- 17 longitudinal cohort study. *BMJ* 2012;344:e2683
- 18 33. Finkelhor D, Ormrod RK, Turner HA. Lifetime assessment of poly-victimization in a national sample of
- 19 children and youth. *Child Abuse Negl.* 2009;33(7):403-11
- 20 34. Jonson-Reid M, Kohl PL, Drake B. Child and adult outcomes of chronic child maltreatment. *Pediatrics*
- 21 2012;129(5):839-45
- 22 35. Copeland WE, Keeler G, Angold A, et al. Traumatic events and posttraumatic stress in childhood. *Arch.*
- 23 *Gen. Psychiatry* 2007;64(5):577-84
- 24 36. Neuner F, Schauer M, Karunakara U, et al. Psychological trauma and evidence for enhanced vulnerability
- 25 for posttraumatic stress disorder through previous trauma among West Nile refugees. *BMC*
- 26 *Psychiatry* 2004;4:34
- 27 37. Tolin DF, Foa EB. Sex differences in trauma and posttraumatic stress disorder: a quantitative review of 25
- 28 years of research. *Psychol. Bull.* 2006;132(6):959-92
- 29 38. Modgill G, Jette N, Wang JL, et al. A population-based longitudinal community study of major depression
- 30 and migraine. *Headache* 2012;52(3):422-32
- 31 39. Zwart JA, Dyb G, Stovner LJ, et al. The validity of 'recognition-based' headache diagnoses in adolescents.
- 32 Data from the Nord-Trondelag Health Study 1995-97, Head-HUNT-Youth. *Cephalalgia*
- 33 2003;23(3):223-9
- 34 40. McGrath PA, Speechley KN, Seifert CE, et al. A survey of children's acute, recurrent, and chronic pain:
- 35 validation of the Pain Experience Interview. *Pain* 2000;87(1):59-73
- 36 41. Tambs K, Moum T. How well can a few questionnaire items indicate anxiety and depression? *Acta*
- 37 *Psychiatr. Scand.* 1993;87(5):364-7
- 38 42. Strand BH, Dalgard OS, Tambs K, et al. Measuring the mental health status of the Norwegian population:
- 39 a comparison of the instruments SCL-25, SCL-10, SCL-5 and MHI-5 (SF-36). *Nord J Psychiatry*
- 40 2003;57(2):113-8
- 41 43. Rodriguez N, Steinberg A, Pynoos RS. *UCLAs PTSD-index for DSM IV (revision 1)*. UCLA Trauma Psychiatry
- 42 *Service, 1999.*
- 43 44. Kenny DA. *Mediation*. Secondary Mediation 2012.
- 44 45. Efron B, Tibshirani RJ. *An Introduction to the Bootstrap*. Monographs on Statistics and Applied Probability
- 45 57: Chapman and Hall/CRC, 1994.
- 46 46. De Ridder KA, Pape K, Johnsen R, et al. School dropout: a major public health challenge: a 10-year
- 47 prospective study on medical and non-medical social insurance benefits in young adulthood, the
- 48 Young-HUNT 1 Study (Norway). *J. Epidemiol. Community Health* 2012
- 49 47. Zwart JA, Dyb G, Holmen TL, et al. The prevalence of migraine and tension-type headaches among
- 50 adolescents in Norway. The Nord-Trondelag Health Study (Head-HUNT-Youth), a large population-
- 51 based epidemiological study. *Cephalalgia* 2004;24(5):373-9
- 52 48. Kessler RC, Avenevoli S, McLaughlin KA, et al. Lifetime co-morbidity of DSM-IV disorders in the US
- 53 national comorbidity survey replication adolescent supplement (NCS-A). *Psychol. Med.*
- 54 2012;42(9):1997-2010
- 55 49. Bonomi AE, Cannon EA, Anderson ML, et al. Association between self-reported health and physical
- 56 and/or sexual abuse experienced before age 18. *Child Abuse Negl.* 2008;32(7):693-701
- 57 50. Gerber MR, Fried LE, Pineles SL, et al. Posttraumatic Stress Disorder and Intimate Partner Violence in a
- 58 *Women's Headache Center*. *Women Health* 2012;52(5):454-71
- 59
- 60



- 1
- 2
- 3 51. Audi CA, Segall-Corrêa AM, Santiago SM, et al. Adverse health events associated with domestic violence
- 4 during pregnancy among Brazilian women. *Midwifery* 2012;28(4):416-21
- 5 52. Rigby K. Peer victimisation at school and the health of secondary school students. *Br. J. Educ. Psychol.*
- 6 1999;69 ( Pt 1):95-104
- 7 53. Fekkes M, Pijpers FI, Fredriks AM, et al. Do bullied children get ill, or do ill children get bullied? A
- 8 prospective cohort study on the relationship between bullying and health-related symptoms.
- 9 *Pediatrics* 2006;117(5):1568-74
- 10 54. Nixon CL, Linkie CA, Coleman PK, et al. Peer relational victimization and somatic complaints during
- 11 adolescence. *J. Adolesc. Health* 2011;49(3):294-9
- 12 55. Tietjen GE, Brandes JL, Peterlin BL, et al. Childhood maltreatment and migraine (part III). Association with
- 13 comorbid pain conditions. *Headache* 2010;50(1):42-51
- 14 56. Danese A, McEwen BS. Adverse childhood experiences, allostasis, allostatic load, and age-related disease.
- 15 *Physiol. Behav.* 2012;106(1):29-39
- 16 57. Macdonald G, Leary MR. Why does social exclusion hurt? The relationship between social and physical
- 17 pain. *Psychol. Bull.* 2005;131(2):202-23
- 18 58. Costello EJ, Erkanli A, Fairbank JA, et al. The prevalence of potentially traumatic events in childhood and
- 19 adolescence. *J. Trauma. Stress* 2002;15(2):99-112
- 20 59. Rutter M, Caspi A, Moffitt TE. Using sex differences in psychopathology to study causal mechanisms:
- 21 unifying issues and research strategies. *Journal of Child Psychology and Psychiatry* 2003;44(8):1092-
- 22 115
- 23 60. Asmundson GJG, Katz J. Understanding the co-occurrence of anxiety disorders and chronic pain: state-of-
- 24 the-art. *Depress. Anxiety* 2009;26(10):888-901
- 25 61. Pynoos RS, Steinberg AM, Piacentini JC. A developmental psychopathology model of childhood traumatic
- 26 stress and intersection with anxiety disorders. *Biol. Psychiatry* 1999;46(11):1542-54
- 27 62. Shonkoff JP, Boyce WT, S. MB. Neuroscience, molecular biology, and the childhood roots of health
- 28 disparities: Building a new framework for health promotion and disease prevention. *JAMA: The*
- 29 *Journal of the American Medical Association* 2009;301(21):2252-59
- 30 63. Russ S, Garro N, Halfon N. Meeting children's basic health needs: From patchwork to tapestry. *Child*
- 31 *Youth Serv Rev* 2010;32(9):1149-64
- 32 64. Goodman A, Joyce R, Smith JP. The long shadow cast by childhood physical and mental problems on adult
- 33 life. *Proc. Natl. Acad. Sci. U. S. A.* 2011;108(15):6032-7
- 34
- 35
- 36
- 37
- 38
- 39
- 40
- 41
- 42
- 43
- 44
- 45
- 46
- 47
- 48
- 49
- 50
- 51
- 52
- 53
- 54
- 55
- 56
- 57
- 58
- 59
- 60

1  
2  
3  
4  
5  
6  
7  
8  
9  
10  
11  
12  
13  
14  
15  
16  
17  
18  
19  
20  
21  
22  
23  
24  
25  
26  
27  
28  
29  
30  
31  
32  
33  
34  
35  
36  
37  
38  
39  
40  
41  
42  
43  
44  
45  
46  
47  
48  
49  
50  
51  
52  
53  
54  
55  
56  
57  
58  
59  
60

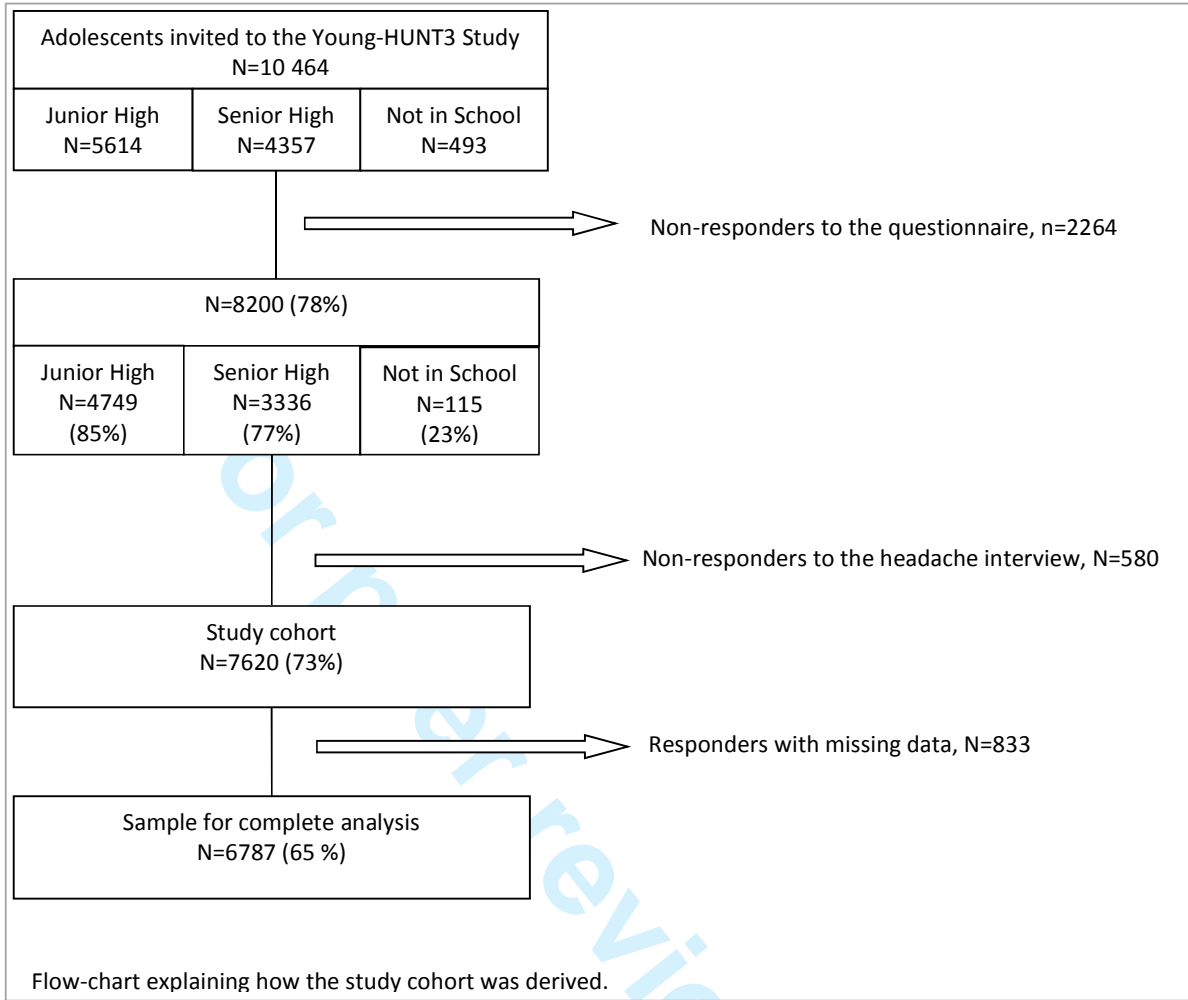

## APPENDIX

### PROPORTIONAL ODDS ASSUMPTIONS

#### Statistics

The proportional odds assumption between degree of victimization and differing levels of headache frequencies, was assessed through three independent logistic regression analysis (Appendix. Table A1).

**Table A1.** Test of proportional odds assumption across frequencies of headache complaints, n=6787.

| Variables       | No.  | No headache v<br>≥monthly recurrent headache<br>N=1514 |                    | ≤ monthly headache v<br>≥weekly recurrent headache<br>N=572 |                    | ≤weekly headache v<br>≥daily recurrent headache<br>N=100 |                    |
|-----------------|------|--------------------------------------------------------|--------------------|-------------------------------------------------------------|--------------------|----------------------------------------------------------|--------------------|
|                 |      | Model 1<br>OR (CI)                                     | Model 2<br>OR (CI) | Model 1<br>OR (CI)                                          | Model 2<br>OR (CI) | Model 1<br>OR (CI)                                       | Model 2<br>OR (CI) |
| Sum of PTIEs    |      |                                                        |                    |                                                             |                    |                                                          |                    |
| 0               | 4789 | 1 [Reference]                                          | 1 [Reference]      | 1 [Reference]                                               | 1 [Reference]      | 1 [Reference]                                            | 1 [Reference]      |
| 1               | 1250 | 1.28 (1.09-1.49)                                       | 1.11 (0.95-1.30)   | 1.44 (1.14-1.80)                                            | 1.22 (0.96-1.53)   | 1.91 (1.17-3.12)                                         | 1.56 (0.95-2.57)   |
| 2               | 496  | 1.96 (1.59-2.43)                                       | 1.55 (1.25-1.94)   | 2.12 (1.57-2.86)                                            | 1.56 (1.14-2.13)   | 1.53 (0.71-3.29)                                         | 1.02 (0.46-2.24)   |
| ≥3              | 252  | 2.51 (1.91-3.31)                                       | 1.66 (1.24-2.22)   | 3.53 (2.53-4.93)                                            | 2.13 (1.49-3.05)   | 3.40 (1.73-6.69)                                         | 1.85 (0.90-3.80)   |
| Overall p-value |      | <0.001                                                 | <0.001             | <0.001                                                      | <0.001             | 0.002                                                    | 0.176              |
| Psychological   | 6787 |                                                        | 2.00 (1.79-2.23)   |                                                             | 2.16 (1.87-2.49)   |                                                          | 2.27 (1.68-3.07)   |
| Distress        |      |                                                        |                    |                                                             |                    |                                                          |                    |

---

Abbreviations: CI, 95% Confidence Interval; OR, Odds Ratio

<sup>a</sup> Study definitions and measures are defined in footnotes to Table 1.

<sup>b</sup> Analyses were restricted to adolescents without missing values, ( $n_{\text{monthly}}=942$ ,  $n_{\text{weekly}}=472$ ,  $n_{\text{daily}}=100$ ).

<sup>c</sup> All models are adjusted for sex, age, family structure and family economy. Model 2 is additionally adjusted for psychological distress.

---

On the basis of previous findings suggesting a clinical severity gradient across subtypes of primary headaches, ranging from tension-type headache, through migraine,(29) to combined migraine with TTH,(7) we also tested the proportional odds assumption of associations between exposure to PTIEs and headache, by subtype, in three subsequent logistic regression analysis (Appendix. Table A2).

**Table A2.** Assessment of proportional odds assumption across subtypes of *primary* headache complaints, n=6718.

| Variables       | No.  | No recurrent headache               |                  | No/TTH                              |                  | No/TTH/migraine,only |                  |
|-----------------|------|-------------------------------------|------------------|-------------------------------------|------------------|----------------------|------------------|
|                 |      | v                                   |                  | v                                   |                  | v                    |                  |
|                 |      | TTH or migraine with or without TTH |                  | migraine only and migraine with TTH |                  | migraine with TTH    |                  |
|                 |      | Model 1                             | Model 2          | Model 1                             | Model 2          | Model 1              | Model 2          |
|                 |      | OR (CI)                             | OR (CI)          | OR (CI)                             | OR (CI)          | OR (CI)              | OR (CI)          |
| Sum of PTIEs    |      |                                     |                  |                                     |                  |                      |                  |
| 0               | 4750 | 1 [Reference]                       | 1 [Reference]    | 1 [Reference]                       | 1 [Reference]    | 1 [Reference]        | 1 [Reference]    |
| 1               | 1234 | 1.26 (1.08-1.48)                    | 1.10 (0.94-1.29) | 1.54 (1.18-2.01)                    | 1.37 (1.04-1.79) | 1.57 (0.94-2.62)     | 1.37 (0.82-2.30) |
| 2               | 485  | 1.91 (1.54-2.37)                    | 1.50 (1.20-1.88) | 2.32 (1.64-3.27)                    | 1.84 (1.29-2.63) | 3.13 (1.74-5.63)     | 2.29 (1.25-4.22) |
| ≥3              | 249  | 2.54 (1.92-3.35)                    | 1.67 (1.24-2.23) | 3.29 (2.23-4.85)                    | 2.25 (1.49-3.40) | 4.40 (2.32-8.34)     | 2.66 (1.34-5.30) |
| Overall p-value |      | <0.001                              | <0.001           | <0.001                              | <0.001           | <0.001               | 0.010            |
| Psychological   | 6718 |                                     | 1.99 (1.78-1.23) |                                     | 1.74 (1.46-2.06) |                      | 1.98 (1.47-2.67) |
| Distress        |      |                                     |                  |                                     |                  |                      |                  |

---

Abbreviations: CI, 95% Confidence Interval; OR, Odds Ratio

<sup>a</sup> Study definitions and measures are defined in footnotes to Table 1.

<sup>b</sup> Analyses were restricted to adolescents without missing values, and either no recurrent headache or primary headaches (69 cases with other headaches excluded ( $n_{TTH}=1048$ ,  $n_{migraine, only}=293$ ,  $n_{migraine w/TTH}=104$ )).

<sup>c</sup> All models are adjusted for sex, age, family structure and family economy. Model 2 is additionally adjusted for psychological distress.

---

### Results regarding proportional odds assumption

Logistic regression analysis assessing the proportional odds assumptions related to headache frequency and subtype of headache, respectively, did not meet the requirement of proportionality in odds relations. Test of parallel lines and ordinal logistic regression analysis were therefore not performed.

SUPPLEMENTARY TABLES.

Between groups comparison of risk of recurrent headache

Table A3. Assessment of Differences in Association Between Varying Frequencies of Recurrent Headache Complaints in Relation to Exposure to PTIEs and Psychological Distress\*†‡.

|              |     | Recurrent headache,<br>n=1514 |                     |                  |                     |                     |     |                     |                     |
|--------------|-----|-------------------------------|---------------------|------------------|---------------------|---------------------|-----|---------------------|---------------------|
|              |     | Monthly vs. Weekly            |                     | Weekly vs. Daily |                     | Monthly vs. Daily   |     |                     |                     |
| Variables    | No. | Model 1<br>OR (CI)            | Model 2<br>OR (CI)  | No.              | Model 1<br>OR (CI)  | Model 2<br>OR (CI)  | No. | Model 1<br>OR (CI)  | Model 2<br>OR (CI)  |
| Sum of PTIEs |     |                               |                     |                  |                     |                     |     |                     |                     |
| 0            | 908 | [Reference]                   | [Reference]         | 334              | [Reference]         | [Reference]         | 684 | [Reference]         | [Reference]         |
| 1            | 269 | 1.15<br>(0.86-1.54)           | 1.07<br>(0.80-1.44) | 117              | 1.47<br>(0.86-2.52) | 1.42<br>(0.83-2.45) | 202 | 1.62<br>(0.97-2.72) | 1.39<br>(0.82-2.35) |
| 2            | 147 | 1.36                          | 1.20                | 63               | 0.75                | 0.70                | 100 | 1.08                | 0.84                |



|                 |      |             |             |     |             |             |      |             |             |
|-----------------|------|-------------|-------------|-----|-------------|-------------|------|-------------|-------------|
|                 |      | (9.94-1.98) | (0.82-1.76) |     | (0.33-1.67) | (0.31-1.58) |      | (0.49-2.38) | (0.37-1.89) |
| ≥3              | 90   | 2.20        | 1.79        | 58  | 1.30        | 1.11        | 56   | 2.61        | 1.84        |
|                 |      | (1.40-3.46) | (1.12-2.86) |     | (0.62-2.72) | (0.51-2.43) |      | (1.24-5.48) | (0.85-3.98) |
| Overall p-value |      | 0.005       | 0.100       |     | 0.346       | 0.390       |      | 0.041       | 0.264       |
| Psychological   | 1414 |             | 1.45        | 572 |             | 1.24        | 1042 |             | 1.97        |
| Distress        |      |             | (1.19-1.76) |     |             | (0.88-1.74) |      |             | (1.40-2.78) |
| p-value         |      |             | <0.001      |     |             | 0.221       |      |             | <0.001      |

Abbreviations: CI, 95% Confidence Interval; OR, Odds Ratio, PTIE, Potentially Traumatic Interpersonal Event.

\* Study definitions and measures are defined in footnotes to Table 1.

† Analyses were restricted to adolescents with recurrent headache without missing values, (n=1514 (nmonthly=942, nweekly=472, ndaily=100)).

‡ All models are adjusted for sex, age, family structure and family economy. Model 2 is additionally adjusted for psychological distress.

1  
2  
3  
4  
5  
6  
7  
8  
9  
10  
11  
12  
13  
14  
15  
16  
17  
18  
19  
20  
21  
22  
23  
24  
25  
26  
27  
28  
29  
30  
31  
32  
33  
34  
35  
36  
37  
38  
39  
40  
41  
42  
43  
44  
45  
46  
47  
48  
49

**Table A4.** Assessment of Differences in Association Between Varying Subtypes of Primary Recurrent Headache Complaints in Relation to Exposure to PTIEs and Psychological Distress\*†‡.

| Recurrent Primary headache,<br>n=1445 |     |                           |                     |                                      |                     |                     |                           |                     |                     |                         |                     |                     |
|---------------------------------------|-----|---------------------------|---------------------|--------------------------------------|---------------------|---------------------|---------------------------|---------------------|---------------------|-------------------------|---------------------|---------------------|
|                                       |     | TTH vs.<br>Migraine, only |                     | Migraine, only vs.<br>Migraine w/TTH |                     |                     | TTH vs.<br>Migraine w/TTH |                     |                     | TTH vs.<br>Any Migraine |                     |                     |
| Variables                             | No. | Model 1<br>OR (CI)        | Model 2<br>OR (CI)  | No.                                  | Model 1<br>OR (CI)  | Model 2<br>OR (CI)  | No.                       | Model 1<br>OR (CI)  | Model 2<br>OR (CI)  | No.                     | Model 1<br>OR (CI)  | Model 2<br>OR (CI)  |
| Sum of PTIEs                          |     |                           |                     |                                      |                     |                     |                           |                     |                     |                         |                     |                     |
| 0                                     | 872 | [Reference<br>]           | [Reference<br>]     | 22                                   | [Reference<br>]     | [Reference<br>]     | 747                       | [Reference<br>]     | [Reference<br>]     | 92                      | [Reference<br>]     | [Reference<br>]     |
| 1                                     | 256 | 1.32<br>(0.94-1.84)       | 1.31<br>(0.94-1.84) | 84                                   | 1.08<br>(0.60-1.94) | 1.04<br>(0.57-1.88) | 216                       | 1.47<br>(0.86-2.50) | 1.36<br>(0.80-2.33) | 27                      | 1.34<br>(0.99-1.81) | 1.31<br>(0.97-1.78) |
| 2                                     | 128 | 1.35<br>(0.83-2.05)       | 1.30<br>(0.82-2.05) | 46                                   | 1.68<br>(0.83-3.38) | 1.50<br>(0.73-3.08) | 114                       | 2.17<br>(1.17-4.01) | 1.92<br>(1.02-3.59) | 14                      | 1.49<br>1.01-2.20)  | 1.44<br>(0.97-2.14) |

|                 |     |             |             |    |             |             |     |             |             |    |             |             |
|-----------------|-----|-------------|-------------|----|-------------|-------------|-----|-------------|-------------|----|-------------|-------------|
| ≥3              | 85  | 1.64        | 1.63        | 38 | 1.71        | 1.38        | 75  | 2.74        | 2.21        | 99 | 1.89        | 1.77        |
|                 |     | (0.98-2.75) | (0.95-2.79) |    | (0.77-3.81) | (0.59-3.22) |     | (1.39-5.39) | (1.10-4.47) |    | (1.20-2.95) | (1.11-2.81) |
| Overall p-value |     | 0.132       | 0.172       |    | 0.357       | 0.674       |     | 0.007       | 0.064       |    | 0.009       | 0.035       |
| Psychologica    | 134 |             | 1.01        | 39 |             | 1.35        | 115 |             | 1.46        |    |             | 1.11        |
| l Distress      | 1   |             | (0.81-1.27) | 7  |             | (0.93-1.97) | 2   |             | (1.05-2.02) |    |             | (0.91-1.36) |
| p-value         |     |             | 0.991       |    |             | 0.115       |     |             | 0.023       |    |             | 0.313       |

Abbreviations: CI, 95% Confidence Interval; OR, Odds Ratio, PTIE, Potentially Traumatic Interpersonal Event.

\* Study definitions and measures are defined in footnotes to Table 1.

† Analyses were restricted to adolescents with recurrent headache without missing values, (n=1514 (nTTH=1048, nmigraine, only=293, nmigraine w/TTH=104)).

‡ All models are adjusted for sex, age, family structure and family economy. Model 2 is additionally adjusted for psychological distress.

**The STROBE checklist\* for the manuscript: Potentially Traumatic Interpersonal Events, Psychological Distress and Recurrent Headaches in Adolescents** A population based study The HUNT Study

The authors have aimed to adhere to the STROBE statements, in order to ensure transparency and the highest possible quality of data handling and presentation (1).

| Section/Topic             | Item # | Recommendation                                                                                                                                                                                                                                                                                                                                                                                                                                                         | Reported on page #                                                                                                                      |
|---------------------------|--------|------------------------------------------------------------------------------------------------------------------------------------------------------------------------------------------------------------------------------------------------------------------------------------------------------------------------------------------------------------------------------------------------------------------------------------------------------------------------|-----------------------------------------------------------------------------------------------------------------------------------------|
| Title and abstract        | 1      | (a) Indicate the study’s design with a commonly used term in the title or the abstract                                                                                                                                                                                                                                                                                                                                                                                 | 1                                                                                                                                       |
|                           |        | (b) Provide in the abstract an informative and balanced summary of what was done and what was found                                                                                                                                                                                                                                                                                                                                                                    | 5-6                                                                                                                                     |
| <b>Introduction</b>       |        |                                                                                                                                                                                                                                                                                                                                                                                                                                                                        |                                                                                                                                         |
| Background/rationale      | 2      | Explain the scientific background and rationale for the investigation being reported                                                                                                                                                                                                                                                                                                                                                                                   | 7-9                                                                                                                                     |
| Objectives                | 3      | State specific objectives, including any pre-specified hypotheses                                                                                                                                                                                                                                                                                                                                                                                                      | 9                                                                                                                                       |
| <b>Methods</b>            |        |                                                                                                                                                                                                                                                                                                                                                                                                                                                                        | 11                                                                                                                                      |
| Study design              | 4      | Present key elements of study design early in the paper                                                                                                                                                                                                                                                                                                                                                                                                                | 10                                                                                                                                      |
| Setting                   | 5      | Describe the setting, locations, and relevant dates, including periods of recruitment, exposure, follow-up, and data collection                                                                                                                                                                                                                                                                                                                                        | 10                                                                                                                                      |
| Participants              | 6      | (a) <i>Cohort study</i> —Give the eligibility criteria, and the sources and methods of selection of participants. Describe methods of follow-up<br><i>Case-control study</i> —Give the eligibility criteria, and the sources and methods of case ascertainment and control selection. Give the rationale for the choice of cases and controls<br><i>Cross-sectional study</i> —Give the eligibility criteria, and the sources and methods of selection of participants | 10, 13-14 and supplemental flow-chart                                                                                                   |
|                           |        | (b) <i>Cohort study</i> —For matched studies, give matching criteria and number of exposed and unexposed<br><i>Case-control study</i> —For matched studies, give matching criteria and the number of controls per case                                                                                                                                                                                                                                                 | Not applicable                                                                                                                          |
| Variables                 | 7      | Clearly define all outcomes, exposures, predictors, potential confounders, and effect modifiers. Give diagnostic criteria, if applicable                                                                                                                                                                                                                                                                                                                               | 11-13                                                                                                                                   |
| Data sources/ measurement | 8*     | For each variable of interest, give sources of data and details of methods of assessment (measurement). Describe comparability of assessment methods if there is more than one group                                                                                                                                                                                                                                                                                   | 11-13                                                                                                                                   |
| Bias                      | 9      | Describe any efforts to address potential sources of bias                                                                                                                                                                                                                                                                                                                                                                                                              | 10 (we were unable to reach non-respondents, but have aimed for a transparent report of potential biases, including flowchart attached) |

|                        |     |                                                                                                                                                                                                                                                                                                           |                                       |
|------------------------|-----|-----------------------------------------------------------------------------------------------------------------------------------------------------------------------------------------------------------------------------------------------------------------------------------------------------------|---------------------------------------|
| Study size             | 10  | Explain how the study size was arrived at                                                                                                                                                                                                                                                                 | 10, 13-14 and supplemental flow-chart |
| Quantitative variables | 11  | Explain how quantitative variables were handled in the analyses. If applicable, describe which groupings were chosen and why                                                                                                                                                                              | 13-14                                 |
| Statistical methods    | 12  | (a) Describe all statistical methods, including those used to control for confounding                                                                                                                                                                                                                     | 13-14                                 |
|                        |     | (b) Describe any methods used to examine subgroups and interactions                                                                                                                                                                                                                                       | 14                                    |
|                        |     | (c) Explain how missing data were addressed                                                                                                                                                                                                                                                               | 14                                    |
|                        |     | (d) <i>Cohort study</i> —If applicable, explain how loss to follow-up was addressed<br><i>Case-control study</i> —If applicable, explain how matching of cases and controls was addressed<br><i>Cross-sectional study</i> —If applicable, describe analytical methods taking account of sampling strategy | 13-14                                 |
|                        |     | (e) Describe any sensitivity analyses                                                                                                                                                                                                                                                                     | Not done                              |
| <b>Results</b>         |     |                                                                                                                                                                                                                                                                                                           |                                       |
| Participants           | 13* | (a) Report numbers of individuals at each stage of study—eg numbers potentially eligible, examined for eligibility, confirmed eligible, included in the study, completing follow-up, and analysed                                                                                                         | 13-14                                 |
|                        |     | (b) Give reasons for non-participation at each stage                                                                                                                                                                                                                                                      | 10, 13-14                             |
|                        |     | (c) Consider use of a flow diagram                                                                                                                                                                                                                                                                        | Attached                              |
| Descriptive data       | 14* | (a) Give characteristics of study participants (eg demographic, clinical, social) and information on exposures and potential confounders                                                                                                                                                                  | 16-18                                 |
|                        |     | (b) Indicate number of participants with missing data for each variable of interest                                                                                                                                                                                                                       | Table 1                               |
|                        |     | (c) <i>Cohort study</i> —Summarise follow-up time (eg, average and total amount)                                                                                                                                                                                                                          | Not applicable                        |
| Outcome data           | 15* | <i>Cohort study</i> —Report numbers of outcome events or summary measures over time                                                                                                                                                                                                                       | Not applicable                        |
|                        |     | <i>Case-control study</i> —Report numbers in each exposure category, or summary measures of exposure                                                                                                                                                                                                      | Not applicable                        |
|                        |     | <i>Cross-sectional study</i> —Report numbers of outcome events or summary measures                                                                                                                                                                                                                        | 16-28                                 |
| Main results           | 16  | (a) Give unadjusted estimates and, if applicable, confounder-adjusted estimates and their precision (eg, 95% confidence interval). Make clear which confounders were adjusted for and why they were included                                                                                              | 16-28                                 |
|                        |     | (b) Report category boundaries when continuous variables were categorized                                                                                                                                                                                                                                 | 16-28                                 |
|                        |     | (c) If relevant, consider translating estimates of relative risk into absolute risk for a meaningful time period                                                                                                                                                                                          | 26-28                                 |
| Other analyses         | 17  | Report other analyses done—eg analyses of subgroups and interactions, and sensitivity analyses                                                                                                                                                                                                            | Supplemental file                     |
| <b>Discussion</b>      |     |                                                                                                                                                                                                                                                                                                           |                                       |
| Key results            | 18  | Summarise key results with reference to study objectives                                                                                                                                                                                                                                                  | 29                                    |
| Limitations            | 19  | Discuss limitations of the study, taking into account sources of potential bias or imprecision. Discuss both direction and magnitude of any potential bias                                                                                                                                                | 29-30                                 |

1  
2  
3  
4  
5  
6  
7  
8  
9  
10  
11  
12  
13  
14  
15  
16  
17  
18  
19  
20  
21  
22  
23  
24  
25  
26  
27  
28  
29  
30  
31  
32  
33  
34  
35  
36  
37  
38  
39  
40  
41  
42  
43  
44  
45  
46  
47  
48  
49

|                          |    |                                                                                                                                                                            |       |
|--------------------------|----|----------------------------------------------------------------------------------------------------------------------------------------------------------------------------|-------|
| Interpretation           | 20 | Give a cautious overall interpretation of results considering objectives, limitations, multiplicity of analyses, results from similar studies, and other relevant evidence | 29-33 |
| Generalisability         | 21 | Discuss the generalisability (external validity) of the study results                                                                                                      | 29-33 |
| <b>Other information</b> |    |                                                                                                                                                                            |       |
| Funding                  | 22 | Give the source of funding and the role of the funders for the present study and, if applicable, for the original study on which the present article is based              | 36    |

\*Give information separately for cases and controls in case-control studies and, if applicable, for exposed and unexposed groups in cohort and cross-sectional studies.  
**Note:** An Explanation and Elaboration article discusses each checklist item and gives methodological background and published examples of transparent reporting. The STROBE checklist is best used in conjunction with this article (freely available on the Web sites of PLoS Medicine at <http://www.plosmedicine.org/>, Annals of Internal Medicine at <http://www.annals.org/>, and Epidemiology at <http://www.epidem.com/>). Information on the STROBE Initiative is available at [www.strobe-statement.org](http://www.strobe-statement.org).

1. von Elm E, Altman DG, Egger M, Pocock SJ, Gotsche PC, Vandembroucke JP, et al. Strengthening the Reporting of Observational Studies in Epidemiology (STROBE) statement: guidelines for reporting observational studies. *BMJ*. 2007 Oct 335(7624):806-8.

# Young HUNT

ADOLESCENT SECTION OF THE HEALTH STUDY IN NORD-TRØNDELAG, HUNT

It's your turn to participate in the Nord-Trøndelag Health Study (**HUNT**)!

**We hope you have read the information brochure about YOUNG HUNT that you took home with**

**you and have decided to participate!**

Read the informed consent form that is inside the questionnaire and check that it is your name

that is on it. Mark it as to whether you will participate or not, sign it and hand it in to the teacher.

**Your name should NOT be on your questionnaire!**

Put an X in the boxes  that you think apply to you. Answer the best you can! If there are

questions that you do not want to answer, skip them.

When you are finished, put the questionnaire in the envelope you have been given, seal it and

give the envelope to the teacher. Do this even if you haven't finished the questionnaire.

**All your answers will be treated in the strictest of confidence!**

No one at school is allowed to see your answers.

If you wish to speak to someone about the study, speak to the Young HUNT nurse when she

visits your school or ring HUNT Research Centre (see back of questionnaire).

**Good Luck and Thank You!**

2

**Date of questionnaire completion** \_\_\_\_/\_\_\_\_/20\_\_\_\_

**1. For those who are in Junior High School: What type of plans do you have regarding your studies in High School?**

High School academic studies  High School vocational studies  Don't know

**2. What type of plans do you have regarding continued studies?**

(Put one or more Xs)

\* College or university \* Other vocational training .....

for 4 years or more .....  \* No plans .....

\* College or university \* Don't know .....

less than 4 years .....

**WHERE YOU LIVE**

**3. What type of housing do you live in? (Only one X)**

\* Single-family house .....  \* Farm w/ animal husbandry.....

\* Row house/2-4 family housing .....  \* Farm w/out animal husbandry .....

\* Flat in block/flat .....  \* Other housing .....

**4. Who do you currently live with? (Put one or more Xs)**

\* Mother .....  \* Foster parents .....

\* Father .....  \* Adoptive parents .....

\* 1-2 siblings .....  \* Grandparents/other.....

\* 3 or more siblings.....  \* Spouse/partner.....

\* Mother's new husband or partner  \* Friends.....

\* Father's new wife or partner.....  \* Alone/in a rented room.....

**5. If your mother and father do not live together, who do you live with?**

Mostly my mother  Mostly my father  Equal time at both parents

**6. Are there pets living in your home?**

No .....  Yes, other animals with fur .....

Yes, cat .....  Yes, bird .....

Yes, dog .....  Yes, other .....

3

**YOUR HEALTH**

**7. How is your health at the moment? (One X)**

\* Poor .....  \* Good.....

\* Not so good .....  \* Very good.....

**8. Are you disabled in any of these ways? (Put an X for each line)**

No A little Somewhat Severely

\* Motor impairment (movement)

\* Vision impairment

\* Hearing impairment

\* Impairment due to physical illness

\* Impairment due to mental health problems

**9. Have you had any of these ailments in the past 12 months: (Put an X for each line)**

Not at all A little Much

\* Palpitation

\* Constipation

\* Diarrhoea

\* Alternating constipation and diarrhoea

\* Bloating

\* Nausea

**ALLERGIES**

**10. Do you have allergies?** Yes  No  Don't know

*If Yes, what do you think you are allergic to? (One or more Xs)*

\* Grass/trees  \* Dogs  \* Food

\* House dust  \* Cats  \* Other

\* Horses  \* Don't know

**11. Has a doctor given you any allergy tests (blood tests, skin tests)?**

Yes  No  Don't know

*If Yes, what did you have an allergic reaction to? (One or more Xs)*

4

\* Nothing  \* Dog  \* Food

\* Grass/trees  \* Cat  \* Other

\* House dust  \* Horse  \* Don't know

**RESPIRATORY TRACT**

**12. Have you ever had wheezing or whistling in the chest?**



Yes  No

IF YOU ANSWERED "NO", SKIP TO QUESTION 15

**13. Have you had wheezing or whistling in the chest in the past 12 months?**

Yes  No

IF YOU ANSWERED "NO", SKIP TO QUESTION 15

**14. How many attacks of wheezing have you had in the past 12 months?**

None  1 to 3  4 to 12  More than 12

\*\*\*\*\*

**15. Do you have or have you had asthma?** Yes  No

If YES, has a doctor said that you have/have had asthma? Yes  No

**16. In the past 12 months has your chest sounded wheezy during or after exercise?**

Yes  No

**17. In the last 12 months have you had a dry cough at night apart from a cough associated a cold or chest infection?**

Yes  No

#### NASAL PROBLEMS

**18. In the past 12 months, have you had a problem with sneezing or a runny or blocked nose when you did not have a cold or the flu?**

Yes  No

IF YOU ANSWERED "NO", SKIP TO QUESTION 21

**19. Has this nose problem been accompanied by itchy-watery eyes?**

Yes  No

**20. How much did this nose problem interfere with your daily activities? (One X)**

Not at all  A little  A moderate amount  A lot

5

**21. Have you ever had hay fever or nasal allergies?** Yes  No

#### RASHES

**22. Have you had an itchy rash during the last 12 months?** Yes  No

IF YOU ANSWERED "NO", SKIP TO QUESTION 25

**23. Have you had this itchy rash in the following places: the folds of your elbow (inside), back**

**of your knees, on the front of your ankles, under your buttocks or around your neck, ears or**

**eyes?** Yes  No

**24. How often on the average has this itchy rash kept you awake at night? (One X)**

Not at all  Less often than 1 night a week  1 night or more a week

**25. Have you ever had eczema?** Yes  No

If Yes, has a doctor said that you have/ have had "atopic eczema"? Yes  No

#### ACNE

**26. Have you had problems with acne?** Yes  No

IF YOU ANSWERED "NO", SKIP TO QUESTION 31

**27. Where was the acne? (Put one or more Xs)**

Forehead.....  Cheeks.....  Shoulders.....  Other places.....

Nose.....  Chest.....  Back.....

1  
2  
3 **28. How much has the acne bothered you?** Very much  Much  A little  Not at all  
4

5 Only one X

6 **29. Have you used non-prescription creams, skin astringents or other similar products**  
7 **to get**

8 **rid of the acne?** (bought at the drug store or other shop, not prescribed by a doctor)

9 Yes  No

10 **If Yes, has it helped?** One X No  Some  Yes

11 **30. Have you been to a doctor because of acne?** Yes  No

12 **If Yes, did the doctor recommend any of the following treatments?** (Put an X for each line)

13 · Topical treatment (ex: creams or liquid solutions) ..... Yes  No

14 · Antibiotic tablets (tetracycline) ..... Yes  No

15 · Roaccutan tablets ..... Yes  No

16 **If Yes, did this treatment help?** (One X) No  Some  Yes

17 6

18 **31. How often have you had any of the below listed pain during the last 3 months?**

19 (Without

20 having injured yourself or having a known illness that is the reason for the pain)

21 *Look at the figure and put an X for each line*

22 **IF YOU ANSWERED "NEVER OR SELDOM" FOR EVERYTHING, SKIP TO QUESTION 34**

23 *If you have had pain during the last 3 months,*

24 **32. Does anything on the below list apply to you?** (Put an X for each line):

25 Yes No

26 \* Pain makes it difficult to fall asleep.....

27 \* Pain disturbs my sleep at night. ....

28 \* Pain makes it difficult to sit in class. ....

29 \* Pain makes it difficult for me to walk more than one kilometre. ....

30 \* Because of pain I have problems in gym class. ....

31 **33. All things considered, has pain made it difficult to do daily activities?** (Put an X for  
32 each

33 line)

34 No Yes, sometimes Yes, often

35 \* At school .....

36 \* In leisure time .....

37 **If you answered Yes, what type of pain makes daily activities difficult?** (One or more Xs)

38 Headache/migraine  Stomach pain  Muscular/skeletal pain  Other pain

39 Never or

40 seldom

41 About

42 once a

43 month

44 About

45 once a

46 week

47 More than

48 once a

49 week

50 Almost

51 every

- day
- A. Headache/migraine
- B. Neck/ shoulder pain
- C. Pain in the upper back
- D. Pain in the lower back/buttocks
- E. Pain in chest
- F. Stomach pain
- G. Pain in left arm
- H. Pain in right arm
- I. Pain in left leg
- J. Pain in right leg
- Other pain

**PAIN**

7

**OTHER ILLNESSES**

**34. Has a doctor diagnosed you with:** (Put an X for each line) Yes No

- \* Epilepsy ..... ∇ ∇
- \* Diabetes ..... ∇ ∇
- \* Migraine ..... ∇ ∇
- \* Juvenile arthritis ..... ∇ ∇
- \* Other illnesses that have lasted longer than 3 months ..... ∇ ∇

**MEDICINE USE**

**35. How often in the last 3 months have you taken non-prescription medicine for any of the**

**below listed complaints?** (medicine not prescribed by a doctor, for example bought at a store or pharmacy) (Put an X for each line)

Never 1 day a 2 days a 3 days a 4 days a week or week week week or less more

- \* Headache/migraine ∇ ∇ ∇ ∇ ∇
- \* Muscle/joint pain ∇ ∇ ∇ ∇ ∇
- \* Back pain ∇ ∇ ∇ ∇ ∇
- \* Stomach pain ∇ ∇ ∇ ∇ ∇
- \* Other ∇ ∇ ∇ ∇ ∇

**36. Do you take any medicine that was prescribed for you by a doctor?** Yes ∇ No ∇

**37. Do you take/use any of these medicines or dietary supplements?**

(Put an X for each line)

Never Sometimes Almost daily

- \* Iron tablets ∇ ∇ ∇
- \* Laxative tablets ∇ ∇ ∇
- \* Vitamins ∇ ∇ ∇
- \* Cod-liver oil ∇ ∇ ∇
- \* Homeopathic medicine, herbal medicine ∇ ∇ ∇
- \* Other ∇ ∇ ∇

**TOBACCO**

**38. Does anyone you live with smoke at home?** (One or more Xs)

- \* No, nobody ∇
- \* Yes, my mother ∇
- \* Yes, a sibling ∇

\* Yes, my father  \* Yes, other people

**39. Have you tried smoking?** (at least one cigarette) Yes  No

8

*IF YOU ANSWERED "NO", SKIP TO QUESTION 43*

**40. Do you smoke?** (Put an X in the appropriate box and write in the number of cigarettes. A package of loose tobacco equals approx. 50 cigarettes)

Yes, I smoke about \_\_\_\_\_ cigarettes daily.

Yes, I smoke occasionally, but not daily.

No, not anymore, but previously I smoked occasionally.

No, not anymore, but previously I smoked about \_\_\_\_\_ cigarettes daily.

No, I don't smoke.

*IF YOU ANSWERED "NO, I DON'T SMOKE", SKIP TO QUESTION 44*

**41. If you smoke or have smoked daily:**

\* How old were you when you began smoking daily? \_\_\_\_\_ years old

\* If you quit smoking daily, how old were you when you quit? \_\_\_\_\_ years old

**42. If you smoke or have smoked occasionally:**

\* How old were you when you began smoking occasionally? \_\_\_\_\_ years old

\* How many days have you smoked in the last month? \_\_\_\_\_ number of days

*(Write 0 if you have not smoked in the past month)*

\* About how many cigarettes have you smoked in the last month? \_\_\_\_\_ number of cigarettes

*(Write 0 if you have not smoked in the past month)*

\* If you quit smoking occasionally, how old were you when you quit? \_\_\_\_\_ years old

**43. How many of your friends smoke?** None  A few  Almost all

(One X)

\*\*\*\*\*

**44. Do you use or have you used snuff, chewing tobacco or similar products?** (One X)

No, never  Yes, but have quit  Yes, sometimes  Yes, everyday

*IF YOU ANSWERED "NO, NEVER", SKIP TO QUESTION 50*

9

**45. If you use or have used snuff/chewing tobacco:**

\* How old were you when you began using snuff/chewing tobacco? \_\_\_\_\_ years old

\* If you stopped using snuff/chewing tobacco, how old were you when you stopped?

\_\_\_\_\_ years old

\* How many boxes/bags of snuff/chewing tobacco do you use/have you used a week?

\_\_\_\_\_ number of boxes/bags

*(Write 0 if you use less than one box a month)*

**46. If you smoke cigarettes and use snuff, which did you start first?**

(One X)

Snuff  About the same time (within 3 months)

Cigarettes  Don't remember

**47. Did you start using snuff to try to quit smoking or to smoke less?**

(One X)

No  Yes, to quit smoking  Yes, to smoke less

**48. How many of your friends use snuff/chewing tobacco?** (One X)

None  A few  Almost all

\*\*\*\*\*

**49. Have you ever tried hash, marijuana or other drugs?** (One X) Yes  No

If Yes, How old were you the first time? \_\_\_\_\_ years old

1  
2  
3 **50. Do you have friends or acquaintances who use drugs?** Yes  No

4 **SPORTS AND EXERCISE**

5 **51. Not during the average school day: How many days a week do you play sports or**  
6 **exercise to**  
7 **the point where you breathe heavily and/or sweat?** (Only one X)

8 \* Everyday  \* Less often than once a week

9 \* 4-6 days a week  \* Less often than once a month

10 \* 2-3 days a week  \* Never

11 \* 1 day a week

12 10

13 **52. Not during the average school day: How many hours a week do you play sports or**  
14 **exercise**

15 **to the point where you breathe heavily and/or sweat?** (Only one X)

16 None  \* About 2-3 hours

17 About ½ hour  \* About 4-6 hours

18 About 1-1½ hours  \* 7 or more hours

19 **53. Think about the past 7 days: How many hours did you spend sitting in an average**  
20 **day?**

21 (This could be the time spent sitting at the computer, doing homework, at friends, reading and TV  
22 watching

23 (include times both sitting and laying down for the last two). Count the times at school and in your  
24 leisure

25 time.) \_\_\_\_\_ Number of hours

26 **54. Do you work out/train at a health club?** Yes  No

27 **55. How often have you done/participated in any of the following activities/sports the**  
28 **past 12**

29 **months?** (Put an X for each line)

30 Never Less than Once Several x  
31 1 x a week a week a week

32 \* Endurance sports (ex: running, cross-country skiing, cycling, swimming)

33 \* Team sports (ex: football, volleyball, handball, ice hockey, squash)

34 \* Aesthetic sports (ex: dance, gymnastics, aerobics)

35 \* Strength sports (ex: weightlifting, wrestling, bodybuilding)

36 \* Martial arts/combat sports (ex: judo, karate, taekwondo, boxing)

37 \* Technical sports (ex: riding, track sports, alpine skiing, ski jumping, snowboard, skate boarding)

38

39 \* Adrenaline sports (ex: white water rafting, mountain climbing, paragliding)

40 \* Jogging or racewalking/hiking

41 \* Other

42 **56. If you haven't been involved in any of these activities/sports in the past 12 months,**  
43 **but did so previously, how old were you when you stopped?** \_\_\_\_ years old

44 **57. Do you participate in sports competitions?** (One X)

45 Yes  No, but I used to compete  No

46 **ALCOHOL**

47 **58. Have you ever tried drinking alcohol?** (Meaning alcoholic beer, wine, hard liquor or  
48 moonshine)

49 Yes  No  Don't know

If Yes, do you sometimes drink alcohol now? Yes  No

IF YOU ANSWERED NO, SKIP TO QUESTION 66

11

59. How old were you when you began drinking (more than a sip)? \_\_\_\_\_ years old

60. Have you ever drunk so much alcohol that you felt intoxicated (drunk)?

(One X)

\* No, never .....  \* Yes, 4-10 times .....

\* Yes, once .....  \* Yes, 11-25 times .....

\* Yes, 2-3 times .....  \* Yes, more than 25 times .....

61. About how much beer, wine or hard liquor do you usually drink during two weeks?

Don't

count alcohol free beer. Write 0 if you do not drink alcohol.

Beer..... number of 1/2 bottles Hard liquor, liqueurs..... number of glasses (approx. 1/2 dl)

Wine..... number of glasses (approx. 1 dl) Moonshine ..... number of glasses (approx. 1/2 dl)

Alcopop ..... number of bottles

62. How often do you currently drink alcohol? (One X)

\* Every week or more often .....

\* Every other week .....

\* More seldom than every other week, but more often than once a month .....

\* Once a month or more seldom than once a month .....

\* Never .....

63. On which days during the week do you most often drink alcohol? (One or more Xs)

I do not drink  Fridays/Saturdays  Other days of the week

64. Have you ever seen either of your parents intoxicated? (One X)

\* Never .....  \* A few times during the year .....

\* A few times .....  \* A few times a month .....

\* A few times a week .....

12

### MEALS AND EATING HABITS

65. How often do you usually eat these meals? (Put an X for each line)

Every- 4-6 days 1-3 days Seldom

day a week a week or never

\* Breakfast

\* Lunch

\* Dinner (warm)

\* Supper/evening snack

66. Are you trying to lose weight? (One X)

No, I'm comfortable with my weight  No, but I need to lose weight  Yes

67. What do you usually eat at school? (One X)

Packed lunch  Buy food at the cafeteria  Do not eat lunch at school

68. Below are listed things that concern your eating habits. (Put an X for each line)

Never Seldom Often Always

\* When I first begin eating, it is difficult to stop.

\* I vomit after I have eaten.

\* I spend too much time thinking about food.

- \* I feel that food controls my life. ▽ ▽ ▽ ▽
- \* When I eat, I cut my food up in small pieces. ▽ ▽ ▽ ▽
- \* It takes me longer than others to finish a meal. ▽ ▽ ▽ ▽
- \* Other people think I'm too thin. ▽ ▽ ▽ ▽
- \* I feel that others pressure me to eat. ▽ ▽ ▽ ▽

**69. How often do you usually drink the following? (Put an X for each line)**

Seldom/ 1-6 glasses 1 glass 2-3 glasses 4 glass or  
never a week a day a day more a day

- \* Cola/soda/still soft drinks w/ sugar..... ▽ ▽ ▽ ▽ ▽
- \* Cola/soda/still soft drinks w/out sugar... ▽ ▽ ▽ ▽ ▽
- \* Whole milk/kefir/yoghurt..... ▽ ▽ ▽ ▽ ▽
- \* Low fat milk or yoghurt/cultured milk..... ▽ ▽ ▽ ▽ ▽
- \* Skim milk (sour/sweet) ..... ▽ ▽ ▽ ▽ ▽
- \* Fruit juice ..... ▽ ▽ ▽ ▽ ▽
- \* Water ..... ▽ ▽ ▽ ▽ ▽

13

**70. How often do you usually eat the following foods? (Put an X for each line)**

Several times Once Every week Less Never  
a day a day but not often than  
everyday every week

- \* Whole grain bread/crispbread ..... ▽ ▽ ▽ ▽ ▽
- \* Oily fish (salmon, trout, mackerel)..... ▽ ▽ ▽ ▽ ▽
- \* Fruit..... ▽ ▽ ▽ ▽ ▽
- \* Vegetables ..... ▽ ▽ ▽ ▽ ▽
- \* White cheese ..... ▽ ▽ ▽ ▽ ▽
- \* Potato chips and such ..... ▽ ▽ ▽ ▽ ▽
- \* Candy, chocolate, other sweets..... ▽ ▽ ▽ ▽ ▽

**71. What type of fat do you usually use on bread? (One X)**

Butter/hard margarine ▽ Soft/low fat margarine ▽ Liquid margarine/Oil ▽ Don't use any  
▽

**72. Do you consider yourself: (One X)**

- \* Very fat ..... ▽ \* Thin..... ▽
- \* Chubby ..... ▽ \* Very thin..... ▽
- \* About the same as others..... ▽

**HOW THINGS ARE GOING FOR YOU**

**73. Thinking about your life at the moment, would you say that you by and large are satisfied**

**with life, or are you mostly dissatisfied? (One X)**

- \* Very satisfied ..... ▽ \* Somewhat dissatisfied ..... ▽
- \* Satisfied..... ▽ \* Dissatisfied ..... ▽
- \* Somewhat satisfied ..... ▽ \* Very dissatisfied ..... ▽
- \* Neither satisfied nor dissatisfied ▽

**74. Do you feel, for the most part, strong and fit or tired and worn out? (One X)**



- \* Very strong and fit ..... ▽ \* Somewhat tired and worn out.. ▽
- \* Strong and fit ..... ▽ \* Tired and worn out..... ▽
- \* Somewhat strong and fit ..... ▽ \* Very tired and worn out .... ▽
- \* Somewhere in between ..... ▽

**75. Would you say you are usually cheerful or downhearted (sad)?** (One X)

- \* Very downhearted (sad) ..... ▽ \* Somewhat cheerful ..... ▽
- \* Downhearted (sad) ..... ▽ \* Cheerful ..... ▽
- \* Somewhat downhearted (sad) ..... ▽ \* Very cheerful ..... ▽
- \* Some of both ..... ▽

14

**76. Below is a list of some problems. Have you been bothered by any of these in the last 14**

**days?** (Put an X for each line)

Not A little Quite Very  
bothered bothered bothered bothered

- \* Been constantly afraid and anxious ..... ▽ ▽ ▽ ▽
- \* Felt tense or uneasy ..... ▽ ▽ ▽ ▽
- \* Felt hopelessness when you think of the future ..... ▽ ▽ ▽ ▽
- \* Felt dejected or sad ..... ▽ ▽ ▽ ▽
- \* Worried too much about various things ..... ▽ ▽ ▽ ▽

**77. How do you see yourself?** Put an X in a box for each sentence below indicating whether you agree or

disagree in how it relates to you. (Put an X for each line)

Strongly Agree Disagree Strongly  
Agree disagree

- \* I take a positive attitude toward myself..... ▽ ▽ ▽ ▽
- \* I certainly feel useless at times..... ▽ ▽ ▽ ▽
- \* I feel I do not have much to be proud of..... ▽ ▽ ▽ ▽
- \* I feel that I am a person of worth,  
at least on an equal plane with others..... ▽ ▽ ▽ ▽

**78. How often do you experience the reactions that are described below?**

(Put an X for each line) Never Seldom Some- Often Always  
times

- \* I feel anxious and don't know what to do  
in an embarrassing situation ..... ▽ ▽ ▽ ▽ ▽
- \* I feel anxious when I am with others and have  
to do something while they watch me do it  
(*ex: be in a play, play music, sports*) ..... ▽ ▽ ▽ ▽ ▽
- \* I feel anxious when I have to speak or read  
aloud in front of a group of people ..... ▽ ▽ ▽ ▽ ▽
- \* Before I go someplace where I'm going to be  
with people (*ex: a party, school, football game*)  
I sweat, my heart beats fast and/or  
I get a headache or stomach ache ..... ▽ ▽ ▽ ▽ ▽
- \* Before I go to a party or someplace with other people  
I think about what could go wrong (*ex: that I make mistakes,*  
*seem dumb and/or...what if they see how frightened I am!*) ..... ▽ ▽ ▽ ▽ ▽



\* I feel anxious and don't know what to do  
when I'm in a new situation ..... ▽ ▽ ▽ ▽ ▽

15

**79. How have you thought and felt about yourself and about your family in the past month?**

(Put an X for each line)

Totally Totally  
agree Agree Average Disagree disagree

\* I easily make others feel comfortable around me ..... ▽ ▽ ▽ ▽ ▽

\* In my family we share views of what is important in life.... ▽ ▽ ▽ ▽ ▽

\* I easily find new friends ..... ▽ ▽ ▽ ▽ ▽

\* I feel comfortable with my family ..... ▽ ▽ ▽ ▽ ▽

\* I am good at talking to new people ..... ▽ ▽ ▽ ▽ ▽

\* My family view the future as positive,  
even when very sad things happen..... ▽ ▽ ▽ ▽ ▽

\* I always find something fun to talk about..... ▽ ▽ ▽ ▽ ▽

\* In my family we support each other... ▽ ▽ ▽ ▽ ▽

**81. Have you during the past month:**

(Put an X for each line) Almost Often Some- Never  
every night times

\* Had difficulty falling asleep in the evening ▽ ▽ ▽ ▽

\* Woke too early and couldn't fall asleep again ▽ ▽ ▽ ▽

**82. Have any of the following things happened to you? (Put an X for each line)**

No Yes, last Yes, in my  
year life

\* That someone in your family has been seriously ill..... ▽ ▽ ▽

\* Death of a loved one..... ▽ ▽ ▽

\* A catastrophe (fire, avalanche, tidal wave, hurricane, etc.)..... ▽ ▽ ▽

\* A serious accident (ex: a very serious car accident) ..... ▽ ▽ ▽

\* Been violently hurt (beaten or injured) ..... ▽ ▽ ▽

\* Seen others violently hurt ..... ▽ ▽ ▽

\* Been put in sexually uncomfortable/abusive situations  
by someone about your age ..... ▽ ▽ ▽

\* Been put in sexually uncomfortable/abusive situations  
by an adult..... ▽ ▽ ▽

\* Been threatened or physically harassed by other  
students at school for a long time..... ▽ ▽ ▽

\* Received painful or frightening treatment at the hospital  
while being treated for an illness or injury..... ▽ ▽ ▽

\* Experienced something else that was very frightening,  
dangerous or violent..... ▽ ▽ ▽

**IF YOU ANSWERED NO TO ALL THE ABOVE, SKIP TO QUESTION 86**

16

If you have experienced any of the above in question 82:

**83. Do you still think very much about what happened?** Yes ▽ No ▽

**If Yes, do you have frightening thoughts, see images or hear sounds from the actual**

experience even when you don't want to? Yes  No

84. When something reminds you about what happened do you become distant, afraid or sad?

Yes  No

85. Do you try to avoid talking about it, thinking about it or feel any feelings about what happened?

Yes  No

86. If it was an injury or accident, do you have physical (bodily)

late complications/problems from this? Yes  No

#### LEISURE TIME

87. How many teams or clubs are you part of? (for example: sports team, boy/girl scouts, band, etc.)

None  One  Two or more

88. How often have you done any of these activities in the past week?

(Put an X for each line)

None Once 2-3 4 times or times more

- \* Visited someone you know.....
- \* Was visited at home.....
- \* Read a book, magazine, comic book.....
- \* Listened to music .....
- \* Played an instrument .....
- \* Was out with friends for more than two hours in a row.....
- \* Was at a meeting or training with a club/team.....
- \* Did a hobby.....
- \* Did homework for more than one hour.....
- \* Watched TV/DVD .....
- \* Played a computer/TV game.....
- \* Played, chatted or surfed the internet .....
- \* Was at the library.....
- \* Went to the movies.....
- \* Was at a cafe or a meeting place for people your age.....
- \* Was in a play, theatre.....
- \* Did photography/film.....
- \* Went to a concert.....
- \* Went to watch a sport event, game.....
- \* Sang in a chore .....

17

89. If you normally do some of the below listed activities, how long do you usually do so each

time? (Put an X for each line)

Less ½ -1 More than

than ½ hour hour 1 hour

\* Watch TV/DVD ..... ▽ ▽ ▽

\* Play computer/TV games..... ▽ ▽ ▽

\* Play, chat or surf the internet ..... ▽ ▽ ▽

\* Listen to music..... ▽ ▽ ▽

**90. Do you have a mobile phone?** Yes ▽ No ▽

*If Yes:*

\* How long do you usually talk on your mobile phone a day? \_\_\_\_\_ Number of minutes

\* How many text/picture messages do you usually get a day? \_\_\_\_\_ Number of messages

\* How many text/picture messages do you send a day? \_\_\_\_\_ Number of messages

**FAMILY AND FRIENDS**

**91. About how many close friends do you have?** (Include those you can speak confidentially with and who help you when you need help. Do not include people you live with, but other relatives should be included.) (One X)

None ▽ One ▽ Two or more ▽

**92. Do you have a steady boyfriend/girlfriend?** Yes ▽ No, not now, but before ▽ No ▽

**93. Are your parents separated or divorced, or have they lived separately for more than one**

**year?** (X the appropriate box and write in your age where necessary)

▽ No

▽ Yes, they lived separately or were separated when I was \_\_\_\_\_ years old, but they later moved back together again.

▽ Yes, they were divorced or separated when I was \_\_\_\_\_ years old.

**94. How well off do you think your family is compared to most others?** (One X)

About the same as most others ▽ Better financial situation ▽ Worse financial situation ▽

**95. Has there been or is there much arguing in your family?** (One X)

No ▽ Yes, the past 12 months ▽ Yes, previously ▽

18

**96. How good is the relationship you have with your immediate family?** (Put an X for each line of

the family members you have. If you have more than one sibling, think about the sibling you have the best relationship to.)

Very good Good Not so good Bad \*

Mother ..... ▽ ▽ ▽ ▽

\* Father ..... ▽ ▽ ▽ ▽

\* Sibling ..... ▽ ▽ ▽ ▽

\* Stepmother or stepfather..... ▽ ▽ ▽ ▽

**97. Do you often feel lonely?** (One X)

\* Very often ..... ▽ \* Seldom ..... ▽

\* Often ..... ▽ \* Very seldom or never..... ▽

\* Sometimes ..... ▽

19

**SCHOOL**

**98. Do any of the following things happen to you at school, or have any of them happened?**

(Put an X for each line)

Never Some- Often Very often  
times

- \* Have difficulties concentrating during class ▽ ▽ ▽ ▽
- \* Think that gym or art is fun ▽ ▽ ▽ ▽
- \* Think other classes are fun ▽ ▽ ▽ ▽
- \* Argue with the teacher ▽ ▽ ▽ ▽
- \* Look forward to going to school ▽ ▽ ▽ ▽
- \* Skip school ▽ ▽ ▽ ▽
- \* Understand what is being taught ▽ ▽ ▽ ▽
- \* Have fun during recess/break time ▽ ▽ ▽ ▽
- \* Are satisfied with your test results ▽ ▽ ▽ ▽
- \* Have fistfights ▽ ▽ ▽ ▽
- \* Are reprimanded by the teacher ▽ ▽ ▽ ▽
- \* Cannot manage to be calm/sit still during class ▽ ▽ ▽ ▽
- \* Become bored or dissatisfied ▽ ▽ ▽ ▽
- \* Receive help for reading or writing problems ▽ ▽ ▽ ▽
- \* Are called a negative name by students for a long time ▽ ▽ ▽ ▽
- \* Are snubbed/excluded by the students for a long time ▽ ▽ ▽ ▽

**HEALTH SERVICES**

**99. During the last 12 months have you been to:** (Put an X for each line)

Yes No

- \* General practitioner (family doctor, doctor outside the hospital)..... ▽ ▽
- \* Doctor at the hospital ..... ▽ ▽
- \* Child health care clinic run by nurses..... ▽ ▽
- \* School health services ..... ▽ ▽
- \* Psychologist ..... ▽ ▽
- \* Physiotherapist ..... ▽ ▽
- \* Chiropractor ..... ▽ ▽
- \* Other practitioner (naturopath, reflexologist,  
laying on of hands, healer, psychic, etc.)..... ▽ ▽

**100. Have you been admitted to the hospital during the past 12 months?**

Yes ▽ No ▽

**101. How often have you been absent from school due to illness during the last 12 months?**

Less than 1 week ▽ 1-2 weeks ▽ More than 2 weeks ▽

20

**PHYSICAL DEVELOPMENT**

*Below are some questions about physical changes that occur through adolescence.*

**102. During the teenage years there are periods where one grows quickly (growing spurt). Have**

**you noticed that your body has grown quickly (become taller)?** (One X)

- 1
- 2
- 3 \* No, I have not begun to grow ..... ▽
- 4 \* Yes, I have barely begun a growing spurt ..... ▽
- 5
- 6 \* Yes, I've clearly begun a growing spurt ..... ▽
- 7
- 8 \* Yes, it seems that I'm finished with growing spurts ..... ▽

9 **103. Concerning hair on your body (under your arms and your crotch/groin)? Would you say that the hair on your body has: (One X)**

- 10
- 11 \* Not begun to grow yet ..... ▽
- 12 \* Barely begun to grow ..... ▽
- 13 \* Quite clearly begun to grow ..... ▽
- 14
- 15
- 16 \* It seems that my body hair has grown in ..... ▽

17 **104. When you look at yourself, do you think that you are physically maturing/have physically matured earlier or later than others your own age? (One X)**

- 18
- 19
- 20 \* Much earlier ..... ▽ \* A little bit later ..... ▽
- 21 \* Earlier ..... ▽ \* Later ..... ▽
- 22 \* A little bit earlier..... ▽ \* Much later ..... ▽
- 23
- 24 \* The same as others ..... ▽

25 **QUESTIONS FOR BOYS**

26 **105. Has your voice begun to change? (One X)**

- 27
- 28 \* No, hasn't begun yet ..... ▽
- 29 \* Yes, has just barely begun ..... ▽
- 30 \* Yes, has clearly begun ..... ▽
- 31
- 32 \* It seems my voice has finished changing ..... ▽

33 **106. Has facial hair begun to grow (moustache or beard)? (One X)**

- 34
- 35 \* No, hasn't begun yet ..... ▽
- 36 \* Yes, has just barely begun ..... ▽
- 37 \* Yes, has clearly begun ..... ▽
- 38
- 39 \* Yes, I have quite a lot of facial hair ..... ▽

40 21

41 **QUESTIONS FOR GIRLS**

42 **107. Have you begun to develop breasts? (One X)**

- 43
- 44 \* No, haven't begun yet ..... ▽ \* Yes, have quite clearly begun ..... ▽
- 45 \* Yes, have barely begun ..... ▽ \* It seems my breasts are fully developed ..... ▽
- 46

47 **108. Have you begun menstruating (gotten your period)? Yes ▽ No ▽**

48 *IF YOU ANSWERED "NO", GO TO PAGE 22*

49 **109. How old were you when you first began menstruating?**

50 I was \_\_\_\_\_ years old and \_\_\_\_\_ months.

51 **110. How many times have you menstruated in the last 12 months? \_\_\_\_\_ times**

52 **111. How long is it usually between your menstruation periods?** (From the first day of a  
53 period to the  
54 first day of the next period)

55 Less than 3 weeks ▽ 3-4 weeks ▽ More than 4 weeks ▽

56 **112. Have you ever missed (not gotten) your period for several months after a regular period?**

57 (without being pregnant)? (One X)

1  
2  
3 \*Yes, 2-5 mos. .... ▾ \* Yes, more than 1 year ..... ▾  
4 \*Yes, 6-12 mos. .... ▾ \* No, never ..... ▾  
5

6 **113. Have you ever taken birth control pills or the mini-pill?**

7 Yes, I take them now ▾ Yes, I took them before ▾ No ▾

8 *If Yes:*

9 **How old were you when you first began taking birth control pills/mini-pills?** \_\_\_\_\_  
10 years  
11 old

12 **How long in total have you taken birth control pills/mini-pills?** \_\_\_\_\_ years old  
13 22

14 FOR STUDENTS IN HIGH SCHOOL

15 These questions are only to be answered by High School students.

16 **114. During the last year, have you often felt that you pressured yourself or**  
17 **continuously**  
18 **pushed yourself?**

19 Yes ▾ No ▾ Don't know ▾

20 **115. Do you feel that you are constantly short of time, even in your everyday tasks?**

21 \* Always, or almost always ..... ▾

22 \* Sometimes ..... ▾

23 \* Never..... ▾

24 **116. Have you ever had thoughts about taking your own life?** Yes No

25 **117. Have you ever used anabolic steroids or other performance enhancing drugs?**

26 Yes No

27 **118. Have you ever had sexual intercourse?** Yes ▾ No ▾

28 If Yes, **How old were you the first time?** \_\_\_\_\_ years old

29 **119. For GIRLS: Have you ever become pregnant when you did not want to be?**

30 Yes ▾ No ▾

31 **120. For BOYS: Have you ever gotten a girl pregnant without intending to?**

32 Yes ▾ No ▾ Don't know ▾

33 **For BOTH boys and girls:**

34 *If Yes,*

35 **How old were you when this happened?** \_\_\_\_\_ years old

36 **Was the result an abortion?** Yes ▾ No ▾ Don't know ▾

37 23

38 **COMMENTS**

39 If you have time, you could write here about what you think is important, but was not  
40 asked about in this  
41 questionnaire. What are your thoughts about being young these days? What do feel  
42 can be improved upon  
43 concerning health and wellbeing for youth of today?

44 **Thank you for your contribution** ☺

45 **Sincerely,**

46 Turid Lingaas Holmen, førsteamanuensis/barnelege

47 **Ung-HUNT leder**

48 HUNT forskningscenter, Neptunveien 1, 7650 Verdal

49 **Telefon: 74075180**\_\_

## HUNT 3

### Declaration of Consent form + 2nd to last page of the brochure

#### Consent

Participation in HUNT 3 and other public health studies is voluntary. The information from the health study cannot be used for research without the consent of the participants. You will be asked to sign a declaration of consent when you participate. Information and samples that you give will be stored for an indefinite time period. In the future it may be used in studies that as of yet have not been planned provided the studies are in accordance with laws and regulations.

In the future, you will be informed about new research projects that use HUNT data. This information can be found at [www.hunt.ntnu.no](http://www.hunt.ntnu.no), and in addition, once a year written information will be sent out to the public. There will also be media coverage about some of the research projects.

You can, at any time after the health study, withdraw your consent and ask that the data about you is deleted or that your blood and urine samples be destroyed. If you wish to withdraw your consent, contact HUNT Research Centre, Neptunveien 1, 7650 Verdal, Telephone 74 07 51 80, Fax 74 07 51 81 or their e-mail: [hunt@medisin.ntnu.no](mailto:hunt@medisin.ntnu.no). We will respect your wishes to not use your information in specific research projects if you request this.

#### New Consent

If in the future we need your information for new types of research questions not described in this brochure, it may be necessary to ask for a new declaration of consent. If this is the case, we will send you a letter. You may also be asked for a new consent in the eventuality of a collaboration with a private company in genetic research. The research of this type of collaboration must also adhere to public laws and regulations. Under no circumstances will blood or other biological material be sold.

#### Personal Information Protection and Security

All information that you give to HUNT 3 will be handled with respect to personal information protection and your private life and in accordance with the laws and regulations. As soon as information, blood samples and/or urine samples are collected, they are stored without being labelled using the identity of the donor. Researchers who later use the information do not have access to names, birthdates or personal identification numbers. All employees associated with the health study have an obligation of confidentiality.

The Data Inspectorate supervises to ensure that the laws and regulations concerning the storage and use of health care information are followed. HUNT 3 is licensed by the The Data Inspectorate.

#### Ethical Approval

All research projects must be approved by an ethical committee. The committee is an independent agency that evaluates the ethical aspect of research projects. HUNT 3 has been approved by The Regional Committee for Medical Research Ethics, Mid-Norway. All future research projects that use data from HUNT must gain approval from the committee.

#### HUNT Databank

HUNT databank contains information collected during HUNT 1, 2 and 3 by means of questionnaires, examinations and analyses of blood and urine samples. If you participated in HUNT 1 and 2, your information will be compared to information in HUNT 3. Genetic material is stored at the HUNT biobank. The goal of the biobank is that in the future it will be possible to take out samples, perform various analyses and compare it to the results of other



1  
2  
3 data from the HUNT databank. In this way there will be continuously more data to be put into  
4 the databank.

5 When researchers receive data from the HUNT databank there are no names, birthdates or  
6 other identifiable characteristics with the data, so they do not know who gave the information.

#### 7 Comparing Information from other Registers

8 For certain research projects it may be necessary to compare data from HUNT with other  
9 public records, for example The Norwegian Prescription Database, The Birth Register, The  
10 Cancer Register and The Cause of Death Register. HUNT data may also be compared to other  
11 registers/databases at Statistics Norway (SSB), for example concerning the environment,  
12 population, education, income, public contribution, employment and other situations that may  
13 have an effect on health.

14 In addition, it may also be relevant to obtain diagnosis information, for example hip fracture,  
15 heart attack, stroke or lung illnesses from primary health care, the hospitals in Nord-Trøndelag  
16 or St. Olavs hospital. Some projects may compare information of parents, children, siblings  
17 and grandparents if they have participated in HUNT.

18 All these comparisons require consent and/or approval from the applicable agencies, for  
19 example The Regional Committee for Medical Research Ethics, The Data Inspectorate, The  
20 Public Health Department or Social Security. All information will be handled with respect to  
21 personal information protection and your private life and in accordance with the laws and  
22 regulations. No researchers will know who gave the information.  
23  
24

#### 25 **Compensation**

26 There is very little risk that participation will lead to injury. If this should occur,  
27 compensation can be applied for through The Norwegian System of Compensation to Patients  
28 (NPE). NPE facilitates compensation applications for patients who have been injured in the  
29 public health care service system.

#### 30 **Young HUNT**

31 All adolescents in the age group 13 to 19 years old in Nord-Trøndelag are invited to  
32 participate in Young HUNT. The project will take place at their schools, with the filling out of  
33 the questionnaire and clinical examinations occurring during school hours. Adolescents and  
34 their parents will receive information about Young HUNT through the school.  
35  
36

#### 37 **Declaration of consent for use of health information in research**

38 The Nord-Trøndelag Health Study 2006-2008 (HUNT3)

39 In the brochure I received I have read about the health study's content and intent, and I have  
40 been given the opportunity to ask questions.  
41  
42

43  
44  
45 I consent to participating in the study.  
46  
47

48 Place, date time  
49  
50

51 \_\_\_\_\_  
52 Name Date of Birth  
53  
54  
55  
56  
57  
58  
59  
60



1  
2  
3 January 4, 2013  
4

5 Mrs. Synne Øien Stensland  
6 Norwegian Centre for Violence and Traumatic Stress Studies Kirkeveien 166 (building 48) Oslo 0881  
7 Norway  
8  
9

10 RE: Potentially Traumatic Interpersonal Events, Psychological Distress, and Recurrent Headaches in  
11 Adolescents  
12

13 Dear Mrs. Stensland:  
14

15 Thank you for allowing us to review your work. Unfortunately, we cannot accept your manuscript for  
16 publication in JAMA Pediatrics. We receive a large number of manuscripts each year and cannot  
17 accept them all. Our decision is based on comments of one outside reviewer as well as review of the  
18 manuscript by one or more of the editors, and discussions of the manuscript by the editorial staff.  
19 Our decision reflects not only methodological quality, but also our assessment of the contribution  
20 the manuscript makes to advances in pediatrics and the care of children.  
21  
22

23 Since acceptance or rejection reflects the priorities of the journal and the opinions of our reviewers  
24 and editors, lack of acceptance does not necessarily imply that the manuscript is unsuitable for  
25 publication elsewhere.  
26

27 We are enclosing the reviewer comments that we hope will be useful to you.  
28

29 Sincerely yours,  
30

31  
32 Alain Joffe, MD, MPH, FAAP  
33 Associate Editor  
34 JAMA Pediatrics  
35 University of Washington  
36 Child Health Institute  
37 6200 NE 74th Street  
38 Ste 120B  
39 Seattle, WA 98115-8160  
40 Phone: (206) 685-3573  
41 eFax: (866) 541-3890  
42 E-mail: [jamapeds@jamanetwork.org](mailto:jamapeds@jamanetwork.org)  
43  
44

45 As part of the continuing evolution of the JAMA Network, I am pleased to announce that the Archives  
46 of Pediatrics & Adolescent Medicine is now JAMA Pediatrics as of January 2013.  
47

48 Confidentiality Note: This communication, including any attachments, is solely for the use of the  
49 addressee, may contain privileged, confidential or proprietary information, and may not be  
50 redistributed in any way without the sender's consent. Thank you.  
51  
52

53  
54 -----  
55 REVIEWER COMMENTS

56  
57 (We received no comments from Reviewer #1.)  
58  
59  
60

1  
2  
3 Reviewer #2 (Remarks to the Author):  
4

5 Overall, this paper is well written and examines an interesting topic. I have some suggestions, that if  
6 addressed, would strengthen the manuscript.  
7

8 However, I would add that any research on trauma that does not consider reactions to trauma as a  
9 key mediator is not useful at this stage in our knowledge about the consequence of traumatic  
10 exposure because most exposed individuals experience no lasting adverse consequences. Unless the  
11 investigators can also report on posttraumatic disorders such as PTSD and depression, this article  
12 does not make a significant contribution to the field.  
13

14 Reviewer #2 (Remarks to the Author (Specific)):  
15

16 Introduction:  
17

18 It would be helpful if the authors provided a clearer motivation for their specific focus on  
19 interpersonal traumatic events, rather than trauma more broadly.  
20

21 A brief explanation of the different types of headaches (e.g., migraine, tension-type, etc) would be  
22 beneficial for those who are unfamiliar with this literature.  
23

24 Methods:  
25

26 I am unfamiliar with the authors' measure of socioeconomic status. Have other studies used this  
27 measure (and if so, could you include a citation)? How should we interpret the adolescent's  
28 perceived relative SES compared to their peers? Was there a measure of parent education in the  
29 questionnaire?  
30

31 How many traumatic events were included in the survey instrument that were not interpersonal  
32 traumatic events? Can the authors give the reader a few examples as to what these were?  
33

34 What was the timeframe used to measure psychological distress? Because traumatic events are  
35 measured as "lifetime" events and the authors are testing mediation, how can the authors be sure  
36 that that the psychological distress occurred after the event? If there is an issue with temporal  
37 ordering with these measures, this should be addressed as a limitation.  
38

39 It would be helpful if the authors provided a clearer description of the derivation of the analytic  
40 sample when moving from the sample size that responded to the headache questionnaire (N=7,620)  
41 to the sample size used in the regression analysis (N=6,787). In other words, could you describe how  
42 many observations were dropped due to missingness on each covariate.  
43

44 Can the authors provide a stronger justification for the stratification of analyses in Table 1 and 2 by  
45 gender (especially because the results in these tables are quite dense)?  
46

47 Do the authors have a citation for their method used to test mediation? (i.e., bootstrapping the  
48 difference in ORs between the models, and using a threshold of 0.10-0.20 as evidence of mediation)  
49

50 Discussion:  
51

52 I was very interested in the prevalence of recurrent headaches in this sample, and think it would be  
53 helpful for the authors to provide some comparison of these prevalence estimates to those of other  
54  
55  
56  
57  
58  
59  
60

1  
2  
3 surveys and populations. Are these estimates low or high compared to other populations? I was  
4 surprised that they were so high given the author's description of the population of this county  
5 (relatively high levels of education and low unemployment).  
6  
7  
8  
9  
10  
11  
12  
13  
14  
15  
16  
17  
18  
19  
20  
21  
22  
23  
24  
25  
26  
27  
28  
29  
30  
31  
32  
33  
34  
35  
36  
37  
38  
39  
40  
41  
42  
43  
44  
45  
46  
47  
48  
49  
50  
51  
52  
53  
54  
55  
56  
57  
58  
59  
60

For peer review only



**Potentially Traumatic Interpersonal Events, Psychological Distress and Recurrent Headache in a Population-based Cohort of Adolescents  
The HUNT Study**

|                                 |                                                                                                                                                                                                                                                                                                                                                                                                                                                                                          |
|---------------------------------|------------------------------------------------------------------------------------------------------------------------------------------------------------------------------------------------------------------------------------------------------------------------------------------------------------------------------------------------------------------------------------------------------------------------------------------------------------------------------------------|
| Journal:                        | <i>BMJ Open</i>                                                                                                                                                                                                                                                                                                                                                                                                                                                                          |
| Manuscript ID:                  | bmjopen-2013-002997.R1                                                                                                                                                                                                                                                                                                                                                                                                                                                                   |
| Article Type:                   | Research                                                                                                                                                                                                                                                                                                                                                                                                                                                                                 |
| Date Submitted by the Author:   | 30-May-2013                                                                                                                                                                                                                                                                                                                                                                                                                                                                              |
| Complete List of Authors:       | Stensland, Synne; Norwegian Centre for Violence and Traumatic Stress Studies, NKVTS ,<br>Dyb, Grete; Norwegian Centre for Violence and Traumatic Stress Studies, NKVTS, ; University of Oslo , Department of Clinical Medicine<br>Thoresen, Siri; Norwegian Centre for Violence and Traumatic Stress Studies, NKVTS,<br>Wentzel-Larsen, Tore; Norwegian Centre for Violence and Traumatic Stress Studies, NKVTS,<br>Zwart, John-Anker; Oslo University Hospital, Department of Neurology |
| <b>Primary Subject Heading</b>: | Epidemiology                                                                                                                                                                                                                                                                                                                                                                                                                                                                             |
| Secondary Subject Heading:      | Neurology, Paediatrics, Mental health                                                                                                                                                                                                                                                                                                                                                                                                                                                    |
| Keywords:                       | Epidemiology < TROPICAL MEDICINE, Migraine < NEUROLOGY, Child & adolescent psychiatry < PSYCHIATRY, Anxiety disorders < PSYCHIATRY, Depression & mood disorders < PSYCHIATRY, PUBLIC HEALTH                                                                                                                                                                                                                                                                                              |
|                                 |                                                                                                                                                                                                                                                                                                                                                                                                                                                                                          |

SCHOLARONE™  
Manuscripts

# Potentially Traumatic Interpersonal Events, Psychological Distress and Recurrent Headache in a Population-based Cohort of Adolescents

## The HUNT Study

Synne Øien Stensland, Grete Dyb, Siri Thoresen, Tore Wentzel-Larsen, John-Anker Zwart

Norwegian Centre for Violence and Traumatic Stress Studies, Kirkeveien 166, bygning 48, 0450 Oslo, Norway

(Synne Øien Stensland MD, Grete Dyb MD PhD Researcher II, Siri Thoresen PhD Researcher II and Tore

Wentzel-Larsen Cand.Real Statistician), Faculty of Medicine, University of Oslo, Postboks 1078, Blindern, 0316

Oslo, Norway (Synne Øien Stensland PhD candidate, Grete Dyb MD PhD Associate Professor and John-Anker

Zwart MD PhD Professor), Centre for Child and Adolescent Mental Health, Eastern and Southern Norway,

Postboks 4623 Nydalen, 0405 Oslo, Norway (Tore Wentzel-Larsen Statistician), Department of

Neurology/FORMI, Ullevål sykehus, Oslo University Hospital, Postboks 4956 Nydalen, 0424 Oslo (John-Anker

Zwart MD PhD Professor)

Correspondence to: Synne Øien Stensland, [synne.stensland@nkvt.s.unirand.no](mailto:synne.stensland@nkvt.s.unirand.no) Norwegian Centre for Violence

and Traumatic Stress Studies, Kirkeveien 166, bygning 48, 0450 Oslo, Norway (mail address may be published),

Tel: +47 22 59 55 00/ + 47 90 55 80 09, Fax: +47 22 59 55 01

**Key words (MeSH):** Adolescent, Crime, Bullying, Mental disorders, Headache disorders, (Public Health)

### WORD COUNT AND TABLES

Text only: 3948 words

Abstract: 291 words

Tables: 4 (+ 2 additional for online publication only (A1 and A2))

Image: Flowchart attached as supplementary file

For peer review only

1  
2  
3  
4  
5  
6  
7  
8  
9  
10  
11  
12  
13  
14  
15  
16  
17  
18  
19  
20  
21  
22  
23  
24  
25  
26  
27  
28  
29  
30  
31  
32  
33  
34  
35  
36  
37  
38  
39  
40  
41  
42  
43  
44  
45  
46  
47  
48  
49  
50  
51  
52  
53  
54  
55  
56  
57  
58  
59  
60

## ARTICLE SUMMARY

### Article Focus

- The main focus was to examine, in a population-based cohort of adolescents, the associations between exposure to potentially traumatic interpersonal events (PTIEs) and migraine and tension-type headaches, meeting the International Classification of Headache Disorders (ICHD-II) criteria.

Further, we aimed to assess the impact of psychological distress on the relationship between PTIEs and recurrent headache. **Key Messages**

- Our study suggests a strong and consistent relationship between exposure to potentially traumatic interpersonal events (PTIEs), and prevalence of ICHD-II defined migraine and tension-type headache, in a population-based cohort study of adolescents.
- Exposure to increasing numbers of types of PTIEs was consistently associated with higher prevalence of all assessed subtypes and frequencies of headache, indicating a dose-response relationship.

Adolescents exposed to PTIEs, reported higher levels of psychological distress than their non-victimized peers. Further, adjustment for experienced psychological distress consistently, and significantly, attenuated strength of associations between PTIEs and recurrent headache. **Strengths and Limitations**

- The strengths of this study were the large sample size, the overall high participation rate, the use of a validated headache interview, based upon the ICHD (II) criteria, and the opportunity to assess the impact of multiple potentially traumatic interpersonal events and confounding factors, within a population-based cohort of adolescents.

- The retrospective, cross-sectional study-design did not allow for causal inference, or differentiation between mediational and confounding effects. Findings should be interpreted within the given constraints of the study.

## ABSTRACT

**Context** Recurrent headache co-occurs commonly with psychological distress, such as anxiety or depression. Potentially traumatic interpersonal events (PTIEs) could represent important precursors of both psychological distress and recurrent headache in adolescents.

**Objective** To assess the hypothesized association between exposure to PTIEs and recurrent migraine and tension-type headache in adolescents, and further examine the potential impact of psychological distress on this relationship.

**Design** The Young-HUNT 3 study, 2006–2008, is a population-based, cross-sectional, cohort study of Norwegian youth that includes self-report data on exposure to potentially traumatic events, psychological distress, and a validated interview on headache.

**Setting and Participants** A cohort of 10 464 adolescents aged 12–20 years from the Nord-Trøndelag county were invited to participate.

**Main Outcome Measures** Data from the headache interview served as outcome. Recurrent headache was defined as headache recurring at least monthly during the past year, and sub classified into monthly, weekly, and daily complaints. Subtypes were classified as tension-type headache (TTH), migraine, migraine with TTH and/or non-classifiable headache, in accordance with the International Classification of Headache Disorders, (ICHD-II).

**Results** The response rate was 73% (7 620). Multiple logistic regression analysis, adjusted for sociodemographics, showed consistently significant associations between exposure to PTIEs



1  
2  
3 and recurrent headache, regardless of frequency or subtype of headache. Increasing  
4  
5 exposure to PTIEs was associated with higher prevalence of recurrent headache, indicating a  
6  
7 dose response relationship.. The strength of associations between exposure to PTIEs and all  
8  
9 recurrent headache disorders significantly attenuated when psychological distress was  
10  
11 entered into the regression equation.  
12  
13

14  
15 **Conclusions** The empirical evidence of a strong and cumulative relationship between  
16  
17 exposure to PTIEs, psychological distress and recurrent headache indicates a need for  
18  
19 integration of somatic and psychological healthcare-services for adolescents, in prevention,  
20  
21 assessment, and treatment of recurrent headache. Prospective studies are needed.  
22  
23  
24  
25  
26  
27  
28  
29  
30  
31  
32  
33  
34  
35  
36  
37  
38  
39  
40  
41  
42  
43  
44  
45  
46  
47  
48  
49  
50  
51  
52  
53  
54  
55  
56  
57  
58  
59  
60

1  
2  
3 Recurrent headache is the most common pain condition during adolescence, and associated  
4  
5 with limitations in everyday life, affecting school functioning and relationships with family  
6  
7 and peers.[1 2] Prepubertal onset of headache, high pain intensity, migraine, and co-  
8  
9 occurring psychological distress is related to chronification and disability, in childhood and  
10  
11 adolescence.[1 3 4] Further, headache-related disability at diagnosis seems to be predictive  
12  
13 of headache-related functional impairment decades later.[5]  
14

15  
16  
17 From early childhood to adolescence there is a marked increase in the prevalence of  
18  
19 headache, which is accompanied by an emerging discrepancy between genders. Prevalence  
20  
21 tend to stabilize in boys, and increase gradually throughout adolescence in girls.[6]  
22  
23

24 Primary tension-type and migraine headaches are by far the most frequent subtypes  
25  
26 of recurrent headache in adolescence.[6] Secondary headache disorders are related to other  
27  
28 conditions, such as medication overuse,[7] infection, or trauma, although these partly  
29  
30 overlap with the preceding.[8] The etiological factors, and pathways leading to onset and  
31  
32 chronification of headache disorders, are largely unknown,[9] yet recognized as  
33  
34 multifactorial, including; heredity, age and sex, somatic, psychological and behavioural  
35  
36 disorders,[10 11] head injuries,[12] unfavourable lifestyle (such as smoking, inactivity,[13]  
37  
38 and inadequacy of sleep[1]), and lack of social and economic resources within families, in  
39  
40 schools and societies.[14-16] Despite distinguishing features related to migraine headaches,  
41  
42 the primary headaches may in part share pathophysiological mechanisms, related to the  
43  
44 chronification of disorders,[9 17] reflected in an observed continuum of clinical severity,  
45  
46 ranging from tension-type complaints, through migraine,[18] to combined migraine with  
47  
48 tension-type headache.[19]  
49  
50  
51  
52  
53  
54

55  
56 Recently researchers have explored the potential role of negative life events on the  
57  
58 development of psychosomatic outcomes, including headache, in adolescence. Positive  
59  
60

1  
2  
3 associations have been found between a range of childhood adversities and headache,  
4  
5 including; economic hardship,[16] parental separation,[20] poor family environment or  
6  
7 neglect,[21] and potentially traumatic events such as disaster,[22] exposure to abuse [23 24],  
8  
9 and bullying.[25] A recent population-based study of adolescents has suggested a dose-  
10  
11 response relationship between frequency of childhood physical abuse and severe  
12  
13 headaches, including migraine,[23] supported by findings from a large convenience sample  
14  
15 study of adults,[26] and a multicentre study of adult migraineurs, alike.[27] Despite these  
16  
17 suggestive findings the evidence for an association between exposure to childhood trauma  
18  
19 and recurrent headache is currently debated.[28]  
20  
21  
22  
23  
24

25 The association between adverse experiences and mood and anxiety disorders in  
26  
27 adolescents, on the other hand, is thoroughly documented.[29] Exposure to severe family  
28  
29 adversity, or potentially traumatic interpersonal events (PTIEs), especially early exposure to  
30  
31 abuse or neglect[30] witnessing domestic violence,[31] exposure to bullying[32] or sexually-  
32  
33 related victimization,[33] is recognized as particularly detrimental, and associated with  
34  
35 prolonged trajectories and comorbidity.[25 34] A steady aggravation of psychological  
36  
37 distress is further documented in relation to exposure to multiple types of PTIEs.[35]  
38  
39 Findings from high-exposure populations suggest that exposure to PTIEs will, regardless of  
40  
41 psychological vulnerability, lead to psychological distress of clinical significance in anyone,  
42  
43 although thresholds vary individually.[34 36] These main trends seem to be similar for both  
44  
45 sexes.[37]  
46  
47  
48  
49  
50

51 During childhood PTIE-exposure is generally evenly distributed. , followed by emerging  
52  
53 sex-related discrepancies in patterns of distribution of PTIEs during adolescence. Adolescent  
54  
55 girls continuously experience more sexually-related and close-network PTIEs, whilst boys get  
56  
57  
58  
59  
60

1  
2  
3 gradually more exposed to all other types of single events. Posttraumatic stress reactions are  
4  
5 generally reported 2-3 times more often by adolescent girls, in comparison to boys.[37]  
6  
7

8  
9 Current epidemiological evidence of a gradual increase in risk of exposure to PTIEs  
10  
11 throughout childhood and adolescence,[33] strongly associated with onset of psychological  
12  
13 distress,[30] which again often co-occur with emerging recurrent headache complaints,[4]  
14  
15 imply possible shared causal pathways.[38] We therefore need to study associations  
16  
17 between the exposure to PTIEs, psychological distress and recurrent headache in  
18  
19 adolescents.[28] The present study was designed to acquire knowledge of associations  
20  
21 between exposure to PTIEs and ICHD-II defined migraine and tension-type headache, in a  
22  
23 population-based cohort of adolescents. The impact of psychological distress upon the  
24  
25 relationship between exposure to PTIEs and recurrent headache was tested specifically.  
26  
27  
28  
29  
30  
31  
32  
33  
34  
35  
36  
37  
38  
39  
40  
41  
42  
43  
44  
45  
46  
47  
48  
49  
50  
51  
52  
53  
54  
55  
56  
57  
58  
59  
60

## METHODS

The Young-HUNT 3 Study, (<http://www.ntnu.edu/hunt/inenglish>), is a population-based, cross-sectional cohort-study of Norwegian youth in Nord-Trøndelag county, conducted between 2006 and 2008, in which 10464 adolescents were invited to participate.[39] The study, which comprises a general health questionnaire, a clinical assessment, and a headache interview, was approved by the Norwegian Regional Committee for Medical and Health Research Ethics. Inclusion was based upon written consent from participants aged 16 years and older and from parents for those under 16, in accordance with Norwegian law.

### Participants

In 2006 there were 128 694 inhabitants in Nord-Trøndelag. Over 95% were ethnic Norwegians, the work force was generally well-educated and unemployment was less than 3%. All adolescents in the county, within an age-range qualifying for attendance in junior or senior high-school, were invited to the study. Of the 10 464 invited adolescents, 5614 were students in junior high, 4357 in senior high, and 493 adolescents were not in school. Most adolescents were from 13 through 18 years old, although age ranged from 12-20. Non-participation was mainly due to lack of enrolment, absenteeism, or participation in class activities outside school. In total 8200 (78%) adolescents completed the general health questionnaire; more specifically 85% (4749) of the junior high students, 77% (3336) of the senior high students and 23% (115) of the adolescents not in school. Further, a total of 73% (7620) also completed the interview on headache.

During a school lesson, students completed a self-administered questionnaire containing over 100 health- and lifestyle-related questions, including items on potentially traumatic

1  
2  
3 events, psychological distress, and posttraumatic stress reactions, in addition to background  
4  
5 information on family structure and family economy [<http://www.ntnu.edu/hunt/data/que>].  
6  
7 Within 1 month of completion of the questionnaire, a validated semi-structured clinical  
8  
9 headache interview was conducted..[40]  
10  
11  
12  
13

### 14 15 16 **Recurrent Headache**

17  
18 All adolescents were asked if they had experienced recurring headache not caused by a cold  
19  
20 (infection) or illness within the past 12 months. 'Yes' responders were read two descriptive  
21  
22 texts of prototypic complaints for tension-type headache (TTH) and migraine. They were  
23  
24 asked if they recognized either, both or neither descriptions as resembling their own  
25  
26 complaints. Thus, the interview differentiated between three types of headache: tension-  
27  
28 type and/or migraine and/or non-classifiable headache. The frequency of recurrent  
29  
30 headache was labelled as monthly (1–3 days/month), weekly (1–4 days/week), and daily (> 4  
31  
32 days/week). Adolescents reporting 'no recurrent headache' and 'headache less than monthly'  
33  
34 were defined as having 'no recurrent headache', whereas all other headache frequencies  
35  
36 were referred to as 'recurrent headache'. This recognition-based headache assessment has  
37  
38 previously been validated against extensive semi-structured interviews by neurologists,[40]  
39  
40 in accordance with the International Classification of Headache Disorders criteria, second  
41  
42 edition (ICHD-II).[8]  
43  
44  
45  
46  
47  
48  
49

### 50 51 **Sociodemography**

52  
53 Information on sex was drawn from the Norwegian National Population Registry, whereas  
54  
55 age was calculated by subtracting the date of birth from the date of completion of the  
56  
57  
58  
59  
60

1  
2  
3 questionnaire. The socio-demographic variable 'family structure' was computed from 12  
4  
5 self-reported items on cohabitants, and was dichotomized into 'living with both parents'  
6  
7 versus 'other' family structures, such as; living with a single parent, stepparents, foster  
8  
9 parents, or without guardians.[20 33] The variable 'family economy', based upon a self-  
10  
11 reported estimation of family affordance in comparison with most others, categorized as  
12  
13 'above average', 'average' and 'below average', represented the socioeconomic situation, as  
14  
15 inequalities in family affluence has previously been shown to be strongly related to  
16  
17 inequalities in adolescent health.[16]  
18  
19  
20  
21

### 22 **Potentially Traumatic Interpersonal Events**

23  
24  
25 In this study potentially traumatic interpersonal events (PTIEs) were defined as social  
26  
27 interactions where an individual is subjected to intentional threats, use of physical force or  
28  
29 power, that may cause immediate or long-term adverse health outcomes. Exposure  
30  
31 encompasses both direct and indirect (witnessing) subjection to PTIEs. A number of  
32  
33 potentially traumatic events were screened for, among which we identified 5 items as being  
34  
35 potentially traumatic interpersonal events (PTIEs). The items were introduced using the  
36  
37 following question: Have you ever experienced any of these events? Select one of the  
38  
39 following response options: 'No', 'Yes, during the past year', or 'Yes, during lifetime'. The  
40  
41 PTIE-related questions in our study were formulated as follows: i) Been subjected to violence  
42  
43 (beaten or injured), ii) Seen others being subjected to violence, iii) Been subjected to  
44  
45 unpleasant/disagreeable sexual acts by someone approximately your own age, iv) Been  
46  
47 subjected to unpleasant/disagreeable sexual acts by an adult, and v) Been threatened or  
48  
49 physically harassed by fellow students at school over a period of time. These items were  
50  
51  
52  
53  
54  
55  
56  
57  
58  
59  
60

1  
2  
3 dichotomized into 'No, not experienced' and 'Yes, during lifetime' (combining the two  
4  
5 original 'yes' categories).  
6

### 7 8 **Psychological Distress**

9  
10 General psychological distress was measured by a five item, short-version instrument,  
11  
12 named SCL-5, modified from the 25 item Hopkins's Symptom Checklist (HSCL) subscale on  
13  
14 anxiety and depression,, measured on a four-point Likert scale.[41] The derived items were  
15  
16 introduced as follows: "Below is a list of some problems and complaints. Have you been  
17  
18 bothered by any of this during the last 14 days? (Select one alternative: 1 = 'not bothered', 2  
19  
20 = 'a little bothered', 3 = 'quite bothered', and 4 = 'very bothered') 'Been constantly afraid or  
21  
22 anxious', 'Felt tense, distressed or restless', 'Felt hopeless when you think about the future',  
23  
24 'Felt dejected or sad' and 'Worried too much about different things?'. A mean score ranging  
25  
26 from 1 to 4 was computed. SCL-5 has previously been validated as a screening instrument for  
27  
28 mental illness or psychological distress.[42]  
29  
30  
31  
32  
33  
34

35 Adolescents reporting one or more PTIEs were asked three yes/no questions on  
36  
37 posttraumatic stress reactions, derived from the child version of the UCLA PTSD index for  
38  
39 DSM-IV,[43] where two items measured current intrusion or re-experience, and one  
40  
41 measured current avoidance.  
42  
43  
44

### 45 **STATISTICS**

46  
47  
48 Descriptive data were presented according to frequency of recurrent headache  
49  
50 complaints (Table 1). Adjusted odds ratios (ORs) and 95% confidence intervals (CIs) were  
51  
52 obtained from logistic regression models that estimated the likelihood of experiencing  
53  
54 recurrent headache according to each of the four categories of exposure to PTIEs within a  
55  
56 complete case sample of 6787/10464 (65%) adolescents (regression Model 1, Tables 2, 3 and  
57  
58  
59  
60



1  
2  
3 4).[44] The number of types of PTIEs was summed for each respondent (range, 0–5), and  
4  
5 PTIE scores of 3, 4, or 5 were combined in one category ( $\geq 3$ ). All models included age, sex,  
6  
7 family structure, and family economy as covariates, based on a priori reasoning. The main  
8  
9 analysis of general recurrent headache was stratified according to sex (Table 2).  
10

11  
12 Furthermore, we tested whether adjustment for psychological distress significantly  
13  
14 altered the estimated strength of associations between PTIEs and recurrent headache. The  
15  
16 magnitude and significance of the alteration in ORs was assessed by bootstrapping, a general  
17  
18 procedure for computing confidence intervals without making distributional  
19  
20 assumptions.[45] . [44] Specifically we used bootstrap methods with 10 000 replicated  
21  
22 samples to calculate bootstrap percentile 95% CIs for the ratio between ORs, in the two  
23  
24 models (odds ratio from Model 2 ( $OR_2$ )/odds ratio from Model 1 ( $OR_1$ ). Bootstrap estimated  
25  
26 confidence intervals not including 1 indicated a significant difference between the two  
27  
28 models. Estimated CIs above 1 would indicate a significant strengthening of the association,  
29  
30 whilst CIs below 1 indicated attenuation in the strength of the relationship between PTIEs  
31  
32 and recurrent headache, after adjustment for psychological distress. Lack of power, due to  
33  
34 low numbers, or measurement uncertainties, on the other hand, would make the ORs less  
35  
36 reliable and the CIs wider, but would not make the ORs systematically closer to, or further  
37  
38 from, the value 1.  
39  
40  
41  
42  
43  
44

45  
46 In supplementary logistic regression analyses we assessed potential differences in  
47  
48 strength of associations between exposure to PTIEs and monthly, weekly and daily headache,  
49  
50 respectively. Followed by analysis of differences in strength of associations between PTIE  
51  
52 exposure and headache by subtypes; TTH, migraine without TTH and migraine with TTH  
53  
54 (supplementary tables A1 and A2 in appendix, online only).  
55  
56  
57  
58  
59  
60

1  
2  
3 Last, we performed a subgroup, multiple regression analysis, assessing the relationship  
4  
5 between PTIEs and recurrent headache, with and without adjustment for posttraumatic  
6  
7 stress reactions, within the 1740/6787 (26%) adolescents exposed to any PTIEs. Furthermore  
8  
9 we repeated analysis, with inclusion of the measure for psychological distress (SCL-5).  
10  
11 Analyses were undertaken using SPSS version 20, in combination with the program R (The R  
12  
13 Foundation for Statistical Computing, Vienna, Austria) package boot for bootstrap  
14  
15 calculations.  
16  
17  
18  
19  
20  
21  
22  
23  
24  
25  
26  
27  
28  
29  
30  
31  
32  
33  
34  
35  
36  
37  
38  
39  
40  
41  
42  
43  
44  
45  
46  
47  
48  
49  
50  
51  
52  
53  
54  
55  
56  
57  
58  
59  
60

## RESULTS

The demographic data are displayed in Table 1.

**Table 1.** Headache Type, Sociodemographics, Exposure to PTIEs, and Psychological Distress, by Frequency of Recurrent Headache, in 7620 adolescents.\*†

| Variables             | n    | No                 | Recurrent Headache  |                     |                     | p value |
|-----------------------|------|--------------------|---------------------|---------------------|---------------------|---------|
|                       |      | Recurrent Headache | Monthly             | Weekly              | Daily               |         |
|                       |      |                    | N (%)/<br>mean (SD) | N (%)/<br>mean (SD) | N (%)/<br>mean (SD) |         |
| <b>Female</b>         |      |                    |                     |                     |                     |         |
| Headache              | 3832 | 2707 (71)          | 653 (17)            | 385 (10)            | 87 (2)              |         |
| TTH                   |      | -                  | 461 (71)            | 249 (65)            | 39 (45)             |         |
| Migraine, without TTH |      | -                  | 137 (21)            | 78 (20)             | 19 (22)             |         |
| Migraine, with TTH    |      | -                  | 24 (4)              | 43 (11)             | 22 (25)             |         |
| Non-classifiable      |      | -                  | 31 (5)              | 15 (4)              | 7 (8)               | <0.001  |
| Age, in years         | 3832 | 15.8 (1.7)         | 15.9 (1.7)          | 16.1 (1.8)          | 16.0 (1.7)          | 0.016¶  |
| Family Structure      | 3798 |                    |                     |                     |                     |         |
| Living w/both parents |      | 1819 (68)          | 396 (61)            | 216 (57)            | 42 (48)             |         |
| Other                 |      | 865 (32)           | 250 (39)            | 165 (43)            | 45 (52)             | <0.001  |
| Family Economy        | 3630 |                    |                     |                     |                     |         |
| Above average         |      | 413 (16)           | 77 (13)             | 57 (16)             | 8 (10)              |         |
| Average               |      | 1946 (76)          | 456 (75)            | 252 (69)            | 62 (73)             |         |
| Below average         |      | 215 (8)            | 74 (12)             | 55 (15)             | 15 (18)             | <0.001  |
| Sum of PTIE‡,         | 3662 |                    |                     |                     |                     |         |
| 0                     |      | 2031 (78)          | 423 (68)            | 226 (61)            | 47 (56)             |         |
| 1                     |      | 382 (15)           | 119 (19)            | 69 (19)             | 22 (26)             |         |
| 2                     |      | 108 (4)            | 50 (8)              | 39 (11)             | 5 (6)               |         |

|                         |      |            |            |            |            |         |
|-------------------------|------|------------|------------|------------|------------|---------|
| ≥3                      |      | 68 (3)     | 28 (5)     | 35 (9)     | 10 (12)    | <0.001  |
| Psychological Distress§ | 3740 | 1.6 (0.5)  | 1.8 (0.6)  | 2.0 (0.7)  | 2.0 (0.7)  | <0.001¶ |
| <b>Male</b>             |      |            |            |            |            |         |
| Headache                | 3788 | 3204 (85)  | 418 (11)   | 145 (4)    | 21 (1)     |         |
| TTH                     |      | -          | 324 (78)   | 98 (68)    | 13 (62)    |         |
| Migraine, without TTH   |      | -          | 70 (17)    | 25 (17)    | 2 (10)     |         |
| Migraine, with TTH      |      | -          | 9 (2)      | 12 (8)     | 4 (19)     |         |
| Non-classifiable        |      | -          | 15 (4)     | 10 (7)     | 2 (9)      | <0.001  |
| Age, in years           | 3788 | 15.8 (1.7) | 15.7 (1.7) | 15.7 (1.6) | 15.8 (2.1) | 0.596¶  |
| Family Structure        | 3748 |            |            |            |            |         |
| Living w/both parents   |      | 2206 (70)  | 273 (66)   | 85 (60)    | 12 (60)    |         |
| Other                   |      | 968 (30)   | 139 (34)   | 57 (40)    | 8 (40)     | 0.047   |
| Family Economy          | 3465 |            |            |            |            |         |
| Above average           |      | 614 (21)   | 82 (22)    | 26 (20)    | 0 (0)      |         |
| Average                 |      | 2107 (72)  | 262 (69)   | 89 (67)    | 12 (63)    |         |
| Below average           |      | 211 (7)    | 38 (10)    | 17 (13)    | 7 (37)     | <0.001  |
| Sum of PTIEs‡           | 3527 |            |            |            |            |         |
| 0                       |      | 2023 (68)  | 244 (64)   | 70 (53)    | 9 (50)     |         |
| 1                       |      | 622 (21)   | 67 (17)    | 31 (24)    | 4 (22)     |         |
| 2                       |      | 255 (9)    | 49 (13)    | 18 (14)    | 3 (17)     |         |
| ≥3                      |      | 95 (3)     | 23 (6)     | 12 (9)     | 2 (11)     | <0.001  |
| Psychological Distress§ | 3617 | 1.3 (0.4)  | 1.5 (0.5)  | 1.5 (0.6)  | 1.9 (0.7)  | <0.001¶ |

Abbreviations: PTIE, Potentially Traumatic Interpersonal Event; TTH, Tension-Type headache

\* Recurrent headache is defined as headache ≥ monthly

† Because of rounding percentages may not total 100

‡ Exposure to PTIEs is measured as the sum of 5 binary variables

§ Range of possible score is 1 to 4

|| Pearson Chi square test

1  
2  
3  
4  
5  
6  
7  
8  
9  
10  
11  
12  
13  
14  
15  
16  
17  
18  
19  
20  
21  
22  
23  
24  
25  
26  
27  
28  
29  
30  
31  
32  
33  
34  
35  
36  
37  
38  
39  
40  
41  
42  
43  
44  
45  
46  
47  
48  
49  
50  
51  
52  
53  
54  
55  
56  
57  
58  
59  
60

---

¶ ANONVA, analysis of variance

---

For peer review only

1  
2  
3 Generally, twice as many girls as boys reported recurrent headache. Amongst girls 20%  
4  
5 reported TTH and 8% reported migraine (with or without TTH), whilst 11% of boys reported  
6  
7 TTH and 3% reported migraine. Prevalence increased with age in girls, but not in boys. .  
8  
9  
10 About two thirds of adolescents with only TTH or migraine reported monthly recurrence,  
11  
12 whilst those with combined migraine and TTH headache mostly reported weekly or daily  
13  
14 complaints. Despite sex differences in headache prevalence, the socio-demographic  
15  
16 distribution of recurrent headache followed similar patterns for both sexes, linking living in  
17  
18 'other' family structures and having a family economy 'below average' with recurrent  
19  
20 headache.  
21  
22

23  
24 In the present study 26% of girls and 33% of boys reported exposure to one or more  
25  
26 types of PTIEs, whilst 4% of both sexes reported exposure to 3 or more. Adolescents without  
27  
28 recurrent headache reported the lowest exposure to PTIEs, with 73% reporting no exposure,  
29  
30 18% reporting exposure to one, and 9% reporting exposure to two or more PTIEs.. Whereas  
31  
32 the highest degree of PTIE exposure was observed amongst adolescents with daily headache,  
33  
34 of whom only 55% reported no exposure, 25% reported exposure to 1, and 20% reported  
35  
36 exposure to two or more PTIEs. Mean score for psychological distress was 1.49 ( $\pm 0.55$ ) (SCL-  
37  
38 5), and increasing distress was significantly associated with recurrent headache, as assessed  
39  
40 in univariate analysis.  
41  
42  
43

44  
45 A multiple logistic regression analysis, adjusted for sociodemographic factors, revealed a  
46  
47 steady trend of increasing odds for recurrent headache with increasing exposure to PTIEs  
48  
49 (Table 2, Model 1). The strength of associations between exposure to PTIEs and recurrent  
50  
51 headache consistently and significantly decreased after psychological distress was entered  
52  
53 into the regression equation (Table 2, Model 2), as assessed in analysis of ratio of odds ratio  
54  
55  
56  
57  
58  
59  
60

with bootstrap 95% percentile CIs. Moreover, the magnitude of attenuation in ORs seemed to increase with increasing exposure to PTIEs.

**Table 2.** Recurrent Headache in Relation to Exposure to PTIEs and Psychological Distress, by Sex.\*†‡

| Variables              | Recurrent Headache (n=1514) |                      |                      |                      |                      |
|------------------------|-----------------------------|----------------------|----------------------|----------------------|----------------------|
|                        | n                           | Female (n=1021)      |                      | Male (n=496)         |                      |
|                        |                             | Model 1              | Model 2              | Model 1              | Model 2              |
|                        |                             | OR <sub>1</sub> (CI) | OR <sub>2</sub> (CI) | OR <sub>1</sub> (CI) | OR <sub>2</sub> (CI) |
| Sum of PTIEs           |                             |                      |                      |                      |                      |
| 0                      | 4789                        | 1 [Reference]        | 1 [Reference]        | 1 [Reference]        | 1 [Reference]        |
| 1                      | 1250                        | 1.46 (1.20-1.78)     | 1.25 (1.02-1.53)     | 1.04 (0.81-1.34)     | 0.93 (0.72-1.20)     |
| 2                      | 496                         | 2.28 (1.69-3.08)     | 1.73 (1.27-2.36)     | 1.71 (1.25-2.33)     | 1.41 (1.03-1.94)     |
| ≥3                     | 252                         | 2.61 (1.82-3.75)     | 1.69 (1.15-2.47)     | 2.29 (1.49-3.52)     | 1.57 (1.00-2.47)     |
| Overall p-value        |                             | <0.001               | <0.001               | <0.001               | 0.029                |
| Psychological Distress | 6787                        |                      | 1.94 (1.70-2.22)     |                      | 2.10 (1.72-2.58)     |

Abbreviations: CI, 95% Confidence Interval; OR<sub>1</sub> and OR<sub>2</sub>, Odds Ratio for Regression Model 1 and Model 2, respectively; PTIE, Potentially Traumatic Interpersonal Event.

\* Study definitions and measures are explained in footnotes to Table 1.

† Analyses are restricted to adolescents no missing values for all included variables (3494 females and 3293 males).

‡ Both regression models are adjusted for age, family structure and family economy. Model 2 is additionally adjusted for psychological distress.

1  
2  
3  
4 Similarly, the associations between exposure to PTIEs and headache by 'monthly', 'weekly',  
5  
6 and 'daily' recurrence, respectively, were all significant and cumulative (Model 1, Table 3).  
7

8  
9 For all frequencies of recurrent headache as outcomes, we observed a significant  
10  
11 attenuation in ORs, with inclusion of psychological distress in the logistic regression analyses  
12  
13 (Model 2). We found a stronger relationship between exposure to PTIEs and weekly, or more  
14  
15 frequent, headache, compared to monthly headache. This difference in strength of  
16  
17 associations levelled out when adjusting for psychological distress (supplementary table A1,  
18  
19 online only).  
20  
21  
22  
23  
24  
25  
26  
27  
28  
29  
30  
31  
32  
33  
34  
35  
36  
37  
38  
39  
40  
41  
42  
43  
44  
45  
46  
47  
48  
49  
50  
51  
52  
53  
54  
55  
56  
57  
58  
59  
60



**Table 3.** Recurrent Headache by Frequency, in Relation to Exposure to PTIEs, Sex and Psychological Distress.\*†‡

|                 |      | Recurrent Headache (n=1514) |                      |                      |                      |                      |                      |
|-----------------|------|-----------------------------|----------------------|----------------------|----------------------|----------------------|----------------------|
|                 |      | Monthly (n=942)             |                      | Weekly (n=472)       |                      | Daily (n=100)        |                      |
|                 |      | Model 1                     | Model 2              | Model 1              | Model 2              | Model 1              | Model 2              |
| Variables       | n    | OR <sub>1</sub> (CI)        | OR <sub>2</sub> (CI) | OR <sub>1</sub> (CI) | OR <sub>2</sub> (CI) | OR <sub>1</sub> (CI) | OR <sub>2</sub> (CI) |
| Sum of PTIEs    |      |                             |                      |                      |                      |                      |                      |
| 0               | 4789 | 1                           | 1                    | 1                    | 1                    | 1                    | 1                    |
|                 |      | [Reference                  | [Reference           | [Reference           | [Reference           | [Reference           | [Reference           |
|                 |      | ]                           | ]                    | ]                    | ]                    | ]                    | ]                    |
| 1               | 1250 | 1.17 (0.97-                 | 1.05 (0.87-          | 1.40 (1.08-          | 1.18 (0.91-          | 2.03 (1.23-          | 1.58 (0.95-          |
|                 |      | 1.41)                       | 1.27)                | 1.81)                | 1.53)                | 3.36)                | 2.64)                |
| 2               | 496  | 1.77 (1.37-                 | 1.46 (1.12-          | 2.46 (1.77-          | 1.78 (1.26-          | 1.93 (0.89-          | 1.17 (0.52-          |
|                 |      | 2.28)                       | 1.90)                | 3.41)                | 2.50)                | 4.20)                | 2.63)                |
| ≥               | 252  | 1.74 (1.22-                 | 1.30 (0.90-          | 3.80 (2.61-          | 2.18 (1.45-          | 4.53 (2.26-          | 2.03 (0.95-          |
|                 |      | 2.48)                       | 1.87)                | 5.54)                | 3.27)                | 9.07)                | 4.34)                |
| Overall p-value |      | <0.001                      | 0.028                | <0.001               | <0.001               | <0.001               | 0.164                |
| Sex§            | 6787 | 1.89 (1.64-                 | 1.60 (1.38-          | 3.51 (2.82-          | 2.62 (2.09-          | 5.14 (3.06-          | 3.56 (2.09-          |
|                 |      | 2.19)                       | 1.87)                | 4.37)                | 3.30)                | 8.64)                | 6.07)                |
| Psychological   | 678  |                             | 1.71 (1.50-          |                      | 2.24 (1.90-          |                      | 2.78 (2.03-          |
| Distress        | 7    |                             | 1.95)                |                      | 2.63)                |                      | 3.80)                |

Abbreviations: CI, 95% Confidence Interval; OR<sub>1</sub> and OR<sub>2</sub>, Odds Ratio for Regression Model 1 and Model 2, respectively; PTIE, Potentially Traumatic Interpersonal Event.

\* Study definitions and measures are defined in footnotes to Table 1.

† Analyses are restricted to adolescents without missing values, (n=6787).

‡ Both models are adjusted for sex, age, family structure and family economy. Model 2 is additionally adjusted for psychological distress.

§ Male is reference category

1 The association between exposure to PTIEs and subtypes of recurrent headache followed a  
2 similar consistently significant and cumulative pattern for all assessed subtypes of recurrent  
3 headache; including tension-type headache (TTH), migraine without TTH, migraine with TTH,  
4 and non-classifiable headache. (Model 1, Table 4). Adding psychological distress in  
5 regression Model 2, for all four subtypes of recurrent headache yielded a significant  
6 reduction in ORs for all analyses. The association between PTIEs and recurrent headache was  
7 significantly stronger amongst adolescents reporting any migraine (with or without TTH), in  
8 comparison to adolescents reporting TTH only (supplementary table A2, online only). This  
9 observed difference between subtypes, seemed to be mainly driven by a stronger  
10 association between exposure to PTIEs and migraine with TTH, as opposed to TTH only. We  
11 found no significant difference in associations between victimization and the two groups of  
12  
13  
14  
15  
16  
17  
18  
19  
20  
21  
22  
23  
24  
25  
26  
27  
28  
29  
30  
31  
32  
33  
34  
35  
36  
37  
38  
39  
40  
41  
42  
43  
44  
45  
46  
47  
48  
49  
50  
51  
52  
53  
54  
55  
56  
57  
58  
59  
60

**Table 4.** Recurrent Headache by Type, in Relation to Exposure to PTIEs, Sex and Psychological Distress.\*†‡

| Variables              | n    | Recurrent Headache (n=1445) |                    |                              |                    |                           |                    |
|------------------------|------|-----------------------------|--------------------|------------------------------|--------------------|---------------------------|--------------------|
|                        |      | TTH (n=1048)                |                    | Migraine without TTH (n=293) |                    | Migraine with TTH (n=104) |                    |
|                        |      | Model 1<br>OR (CI)          | Model 2<br>OR (CI) | Model 1<br>OR (CI)           | Model 2<br>OR (CI) | Model 1<br>OR (CI)        | Model 2<br>OR (CI) |
| Sum of PTIEs           |      |                             |                    |                              |                    |                           |                    |
| 0                      | 4789 | 1 [Reference]               | 1 [Reference]      | 1 [Reference]                | 1 [Reference]      | 1 [Reference]             | 1 [Reference]      |
| 1                      | 1250 | 1.16 (0.97-1.39)            | 1.01 (0.84-1.22)   | 1.59 (1.17-2.17)             | 1.40 (1.02-1.92)   | 1.64 (0.98-2.76)          | 1.38 (0.82-2.33)   |
| 2                      | 496  | 1.71 (1.34-2.20)            | 1.35 (1.04-1.75)   | 2.26 (1.17-2.17)             | 1.76 (1.14-2.72)   | 3.72 (2.04-6.76)          | 2.46 (1.32-4.60)   |
| ≥3                     | 252  | 2.12 (1.54-2.92)            | 1.42 (1.02-1.99)   | 3.39 (2.10-5.48)             | 2.19 (1.31-3.66)   | 6.08 (3.16-11.70)         | 3.36 (1.66-6.77)   |
| Overall p-value        |      | <0.001                      | 0.034              | <0.001                       | 0.003              | <0.001                    | 0.002              |
| Sex§                   | 6787 | 2.10 (1.83-2.42)            | 1.71 (1.47-1.97)   | 3.08 (2.36-4.02)             | 2.49 (1.88-3.28)   | 4.73 (2.91-7.68)          | 3.38 (2.05-5.57)   |
| Psychological distress | 6787 |                             | 1.95 (1.72-2.21)   |                              | 1.83 (1.49-2.25)   |                           | 2.41 (1.77-3.27)   |

Abbreviations: CI, 95% Confidence Interval; OR, Odds Ratio; PTIE, Potentially Traumatic Interpersonal Event; TTH, Tension-type Headache.

\* Study definitions and measures are defined in footnotes to Table 1.

† Analyses were restricted to adolescents without missing values, (n=6787). Data for analysis of non-classifiable recurrent headache (n=69) is not presented.

‡ Model 1 is adjusted for sex, age, family structure and family economy. Model 2 is adjusted for psychological distress, sex, age, family structure and family economy.

1  
2  
3  
4  
5 § Male is reference category  
6  
7

---

8 Furthermore, in subgroup analysis, investigating the impact of posttraumatic stress reactions on the relationship between exposure to  
9 PTIEs and recurrent headache, posttraumatic stress reactions independently and significantly attenuated ORs. The contribution of  
10 posttraumatic stress reactions became insignificant when we additionally adjusted for general psychological distress.  
11  
12  
13  
14  
15  
16  
17  
18  
19  
20  
21  
22  
23  
24  
25  
26  
27  
28  
29  
30  
31  
32  
33  
34  
35  
36  
37  
38  
39  
40  
41  
42  
43  
44  
45  
46  
47  
48  
49

## DISCUSSION

1 To our knowledge this is the first population-based study to comprehensively assess  
2  
3 associations between exposure to multiple potentially traumatic interpersonal events (PTIEs)  
4  
5 and recurrent headache, meeting the ICHD-II criteria. The study documents a strong and  
6  
7 consistent relationship between exposure to PTIEs and recurrent headache experienced by  
8  
9 adolescents. The association was observed for both monthly, weekly and daily headache,  
10  
11 although significantly stronger for weekly or more frequent complaints. A similar, robust  
12  
13 pattern was found between exposure to PTIEs and ICHD-II defined tension-type headache  
14  
15 (TTH), migraine without TTH, migraine with TTH, and non-classifiable headache. Increasing  
16  
17 exposure to PTIEs was associated with higher prevalence of all assessed frequencies and  
18  
19 subtypes of recurrent headache, indicating a dose-response relationship. Furthermore,  
20  
21 adjustment for psychological distress lead to a consistent and significant decrease in  
22  
23 strength of associations between exposure to PTIEs and all frequencies and subtypes of  
24  
25 recurrent headache. Posttraumatic stress reactions seem to play a similar role, although  
26  
27 adjustment for general distress levelled out its specific effect. This may indicate that general  
28  
29 psychological distress, as measured within this study; encompass posttraumatic stress  
30  
31 reactions, as found in a recent study of comorbidity in adolescents.[46]  
32  
33  
34  
35  
36  
37  
38  
39  
40  
41  
42

43 The strengths of this study were the large sample size, the overall high participation rate, the  
44  
45 use of a validated headache interview based upon the International Classification of  
46  
47 Headache Disorder (II) criteria,[40] and the opportunity to assess the impact of several types  
48  
49 of PTIEs and confounding factors, within a population based cohort of adolescents.

50  
51 Importantly, the retrospective, cross-sectional study-design did not allow for causal  
52  
53 inference, or differentiation between confounding and mediational effects. Findings should  
54  
55 thus be interpreted within the given constraints of the study. The lower participation- and  
56  
57  
58  
59  
60

1 response-rate among adolescents not enrolled in school, and among those in senior high  
2 school compared with junior high school, represent a possible selection bias. Additionally,  
3 young adolescents, boys, and adolescents not living with both parents were less likely to  
4 respond to the PTIE items. This missing-pattern may represent another source of selection  
5 bias. The most prominent observed selection-bias within this study is the high non-response  
6 amongst adolescents not enrolled in school, which may have led to an underestimation of  
7 the associations.[47] Our measures of PTIEs lack event-specific information on relationship to  
8 perpetrator, severity, frequency, duration and recency of exposure,[48] and commonly  
9 occurring PTIEs, such as emotional abuse, peer relational victimization and cyber-bullying  
10 were not addressed.[49 50] The above mentioned uncertainties, related to the  
11 measurement of PTIEs, may have affected the observed strengths of associations.  
12 Furthermore, analysis on an additional outcome-measure of headache-related functional  
13 impairment would, most probably, have strengthened associations.[24] Despite these,  
14 accounted for, potential selection-biases and measurement uncertainties, it is likely that the  
15 main findings can be generalized to other adolescent populations.

16  
17  
18  
19  
20  
21  
22  
23  
24  
25  
26  
27  
28  
29  
30  
31  
32  
33  
34  
35  
36  
37  
38  
39  
40  
41  
42  
43  
44  
45  
46  
47  
48  
49  
50  
51  
52  
53  
54  
55  
56  
57  
58  
59  
60

Prevalence rates of recurrent headache, including frequencies and subtypes of complaints, were in large unchanged in comparison with national headache prevalence from 1995-1997,[51] and within the lower range of aggregated international estimates.[6] Further, the observed patterns of distribution of recurrent headache in this study, in relation to sex, age, [6] sociodemography[2 16 20] and psychological distress[2 4 10 19] complied with previous epidemiological documentation. Likewise, the observed prevalence of exposure to PTIEs in our study was within the lower range, and distribution followed similar patterns, to that observed in comparable studies, although comparison across measures and populations is difficult.[28 33] Regarding levels of psychological distress screening estimates were in correspondence with prior national and international findings.[42 46]

1 Our main findings substantiate recent but scarce evidence provided by cross-sectional  
2 population-based studies of adolescents, of a significant association between exposure to  
3 PTIEs and headache. Two of these studies used the ICHD-II criteria.[14 21 23 25] Further,  
4  
5 results are in coherence with one population-based,[52] two clinical,[27 53] and another two  
6  
7 convenience-sample[26 54] retrospective, cross-sectional studies of adults, of which one  
8  
9 used the ICHD-II criteria.[27] Apart from one adolescent study which examined girls only,[14]  
10  
11 and the adult convenience sample study,[26] the sample-sizes in these studies were smaller,  
12  
13 than in the present study. Generally, the adolescent studies assessed exposure to one type  
14  
15 of PTIEs only, whilst the adult studies looked specifically at child abuse and family  
16  
17 dysfunction.  
18  
19  
20  
21  
22  
23  
24  
25  
26

27 Concerning temporality of associations, a large cohort study using follow-up data  
28 over 12 years of adolescent and adult Canadians recently found childhood adversity and  
29 depression to be significant predictors of adult migraine.[38] Additionally, observational,  
30 prospective, convenience sample studies of adolescents exposed to bullying lend evidence  
31 to the more general relationship between victimization and psychosomatic complaints,  
32 although headache measurements in these studies were too imprecise to draw more specific  
33 conclusions of associations.[49 55 56] Taken together, some evidence suggests that PTIEs  
34 may be important factors on the causal pathway leading to onset and chronification of  
35 headache disorder.  
36  
37  
38  
39  
40  
41  
42  
43  
44  
45  
46  
47  
48

49 Amongst the observed relationships, between exposure to PTIEs and main subtypes of  
50 headache, migraine was most strongly linked to exposure. The observed stronger association  
51 between PTIEs and migraine, as opposed to TTH, seemed to be explained in large by the  
52 stronger association between exposure to PTIEs and combined headache (migraine with  
53 TTH). This may indicate that exposure to PTIEs predispose for more severe and complex  
54  
55  
56  
57  
58  
59  
60

1 head pains,[57] reflecting a similar pattern as that observed in the relationship between  
2 PTIE-exposure and comorbidity of psychiatric disorders.[29] Such an interpretation complies  
3 with previous findings that both migraines in general and combined migraines specifically,  
4 tend to be clinically more severe and disabling, compared to TTH only.[18 19] On the other  
5 hand, the observed discrepancies in strength of associations may be an artefact of  
6 underlying chronification of complaints, as migraine with TTH was more often experienced  
7 weekly or daily, as opposed to migraine or TTH only, which mostly recurred monthly.

8 Our findings suggest that psychological distress may play an important role as a  
9 confounder, or a mediator. A mediating role would comply with current pathophysiological  
10 understanding, where violence as an environmental stressor, may acutely or over time  
11 overwhelm, exhaust and further dysregulate the stress response system.[58] Pathological  
12 effects, such as recurrent headache, though initially induced by external trauma, may largely  
13 be related to persistence of physiological distress, functioning as an internal stressor that  
14 triggers cerebral sensitization and hypersensitivity through alterations of shared  
15 neuroendoimmunological pathways of emotion and pain, which in turn may lead to  
16 hyperalgesia and chronification of headache disorders.[3 9 17 59] Future interdisciplinary  
17 studies need to explore these suggested mechanisms to delineate etiological pathways, and  
18 further enable tailored interventions.

19 Sex differences in the strength of associations between PTIEs and recurrent headache  
20 may be related to the gender-biased qualitative differences of reported PTIEs, such as girls  
21 being more prone to sexual abuse and exposure within their social networks.[37] Such  
22 exposure is associated with worse health outcomes, which are possibly related to the  
23 developmental stage at the time of abuse, proximity to the perpetrator, and the persistence  
24 and severity of the abuse.[31 60] Other possible mechanisms may be related to  
25 developmental biological differences, or sociocultural gender role expectations affecting  
26 reaction patterns,[61] predisposing girls to internalizing as opposed to externalizing



behaviour, which in turn increase their susceptibility of experiencing persistent chronic pain.[62]

## Conclusion and implications

Our main findings comply with essential features of current theoretical models of developmental psychopathology,[63] recurrent pain[62] and chronic paediatric headache[31 7 64] that underscore the need for a biopsychosocial approach to understand adverse health outcomes in childhood. Knowing that recurrent headaches are amongst the most common causes of disability in adults and adolescents alike,[1 18] substantiated empirical evidence of a strong, consistent and cumulative relationship between exposure to PTIEs, psychological distress and recurrent headache, regardless of subtype, demands for further investigation.[23] We are currently at a stage where we recognize that childhood victimization and adversities do little good for psychological and somatic health and development, and yet we lack valid, distinct and precise knowledge to guide public health interventions and clinical practice. Thus, primarily there is a need for more comprehensive, interdisciplinary research, preferably prospective, using valid measurements of risk factors and clinically applicable outcome-measures, aiming to identify underlying gene-environment interplay, or biopsychosocial causal pathways, as targets of tailored prevention and intervention. Secondly, from a more general public health perspective, the observed dependency between exposure to PTIEs and highly prevalent psychological and somatic conditions challenges the traditional dichotomization of health services, requiring establishment and maintenance of low-threshold, local health services directed toward adolescents that integrate and accommodate psychological and somatic needs.[64-67]

**CONTRIBUTORSHIP**

Contributors: SØS carried out the data processing, analyzed the data, drafted and revised the paper. She is the guarantor. GD and JAZ contributed to the integration of the headache interview, measures of victimization and posttraumatic distress in the Young-HUNT3 Study. GD and ST wrote the original study protocol, applied for and received the grant for the study, and further participated in the epidemiological modeling, analysis and writing of the manuscript. TWL contributed to the statistical analysis. JAZ participated in the design of the study and helped to write the manuscript. All authors have read and approved the final version of the manuscript.

**ACKNOWLEDGEMENTS**

We would like to thank the adolescents participating in the HUNT Study and the HUNT research centre for their collaboration. Further we would like to thank Professor Dean Kilpatrick for his useful comments on the manuscript.

**COMPETING INTERESTS/DISCLOSURE**

None declared. Synne Øien Stensland, Grete Dyb, Siri Thoresen, Tore Wentzel-Larsen and John-Anker Zwart report no competing interests. All authors have completed the BMJ declaration of competing interests and the Unified Competing Interest form (available on request from the corresponding author) and declare that S. Stensland has support from The Norwegian Council for Mental Health, The Norwegian Extra Foundation for Health and Rehabilitation for the submitted work; (2) none have relationships with companies that might have an interest in the submitted work in the previous 5 years; (3) their spouses, partners, or children have no financial relationships that may be relevant to the submitted work; and (4) the authors have no non-financial interests that may be relevant to the submitted work.

**ACCESS AND INTEGRITY OF ALL AUTHORS**

All authors had full access to all of the data (including statistical reports and tables) in the study and can take full responsibility for the integrity of the data and the accuracy of the data analysis.

**FUNDING**

1 This work was supported by the Norwegian Centre for Violence and Traumatic Stress Studies and  
2  
3 with a grant from The Norwegian Council for Mental Health, The Norwegian ExtraFoundation for  
4  
5 Health and Rehabilitation, grant number 2009/2/0023. The Nord-Trøndelag Health Study (The HUNT  
6  
7 Study), which is a collaboration between HUNT Research Centre (Faculty of Medicine, Norwegian  
8  
9 University of Science and Technology NTNU), Nord-Trøndelag County Council, Central Norway Health  
10  
11 Authority, and the Norwegian Institute of Public Health planned, organized and financed the data  
12  
13 collection.  
14

**ETHICS APPROVAL**

15  
16  
17  
18 Inclusion was based upon written consent from participants aged 16 years and older and from  
19  
20 parents for those under 16, in accordance with Norwegian law. This study was approved by the  
21  
22 Norwegian Regional Committee for Medical and Health Research Ethics.  
23  
24

**DATA SHARING STATEMENT**

25  
26  
27  
28 Data are available from the HUNT study [http://www.huntbiosciences.com/Cohorts/Diabetes/The-](http://www.huntbiosciences.com/Cohorts/Diabetes/The-HUNT-Bio-And-Databank)  
29  
30 [HUNT-Bio-And-Databank](http://www.huntbiosciences.com/Cohorts/Diabetes/The-HUNT-Bio-And-Databank). The general health questionnaire and headache interview used in the  
31  
32 study are accessible from the HUNT bio-and databank (<http://www.ntnu.edu/hunt/data/que>). There  
33  
34 is no additional data available.  
35  
36

**THE ORIGINAL STUDY PROTOCOL**

37  
38  
39  
40 The original study protocol is accessible from the corresponding author, and may be translated from  
41  
42 Norwegian to English on request.  
43  
44  
45  
46  
47  
48  
49  
50  
51  
52  
53  
54  
55  
56  
57  
58  
59  
60

## REFERENCES

1. Roth-Isigkeit A, Thyen U, Stöven H, et al. Pain Among Children and Adolescents: Restrictions in Daily Living and Triggering Factors. *Pediatrics* 2005;115(2)
2. King S, Chambers CT, Huguet A, et al. The epidemiology of chronic pain in children and adolescents revisited: A systematic review. *Pain* 2011;152(12):2729-38
3. Seshia SS, Wang SJ, Abu-Arafeh I, et al. Chronic daily headache in children and adolescents: a multi-faceted syndrome. *Can. J. Neurol. Sci.* 2010;37(6):769-78
4. Dunn KM, Jordan KP, Mancl L, et al. Trajectories of pain in adolescents: a prospective cohort study. *Pain* 2011;152(1):66-73
5. Brna P, Dooley J, Gordon K, et al. The prognosis of childhood headache: a 20-year follow-up. *Arch. Pediatr. Adolesc. Med.* 2005;159(12):1157-60
6. Jensen R, Stovner LJ. Epidemiology and comorbidity of headache. *Lancet Neurol* 2008;7(4):354-61
7. Dyb G, Holmen TL, Zwart JA. Analgesic overuse among adolescents with headache: the Head-HUNT-Youth Study. *Neurology* 2006;66(2):198-201
8. Olesen J. The international classification of headache disorders, 2nd edition (ICHD-II). *Rev. Neurol. (Paris)*. 2005;161(6-7):689-91
9. Kelman L. The biological basis of headache. [Review]. *Expert review of neurotherapeutics* 2011;11 (3):363-78
10. Strine TW, Okoro CA, McGuire LC, et al. The associations among childhood headaches, emotional and behavioral difficulties, and health care use. *Pediatrics* 2006;117(5):1728-35
11. Lateef TM, Merikangas KR, He J, et al. Headache in a national sample of American children: prevalence and comorbidity. *J. Child Neurol.* 2009;24(5):536-43
12. Seifert TD, Evans RW. Posttraumatic headache: a review. *Curr Pain Headache Rep* 2010;14(4):292-8
13. Robberstad L, Dyb G, Hagen K, et al. An unfavorable lifestyle and recurrent headaches among adolescents: the HUNT study. *Neurology* 2010;75(8):712-7
14. Ghandour RM, Overpeck MD, Huang ZJ, et al. Headache, stomachache, backache, and morning fatigue among adolescent girls in the United States: associations with behavioral, sociodemographic, and environmental factors. *Arch. Pediatr. Adolesc. Med.* 2004;158(8):797-803
15. Lewandowski AS, Palermo TM, Stinson J, et al. Systematic Review of Family Functioning in Families of Children and Adolescents With Chronic Pain. *The Journal of Pain* 2010;11(11):1027-38
16. Holstein BE, Currie C, Boyce W, et al. Socio-economic inequality in multiple health complaints among adolescents: international comparative study in 37 countries. *International journal of public health* 2009;54 Suppl 2:260-70
17. Borsook D, Maleki N, Becerra L, et al. Understanding Migraine through the Lens of Maladaptive Stress Responses: A Model Disease of Allostatic Load. *Neuron* 2012;73(2):219-34
18. Merikangas KR, Cui L, Richardson AK, et al. Magnitude, impact, and stability of primary headache subtypes: 30 year prospective Swiss cohort study. *BMJ* 2011;343:d5076
19. Waldie KE, Poulton R. The burden of illness associated with headache disorders among young adults in a representative cohort study. *Headache* 2002;42(7):612-9
20. Bugdayci R, Ozge A, Sasmaz T, et al. Prevalence and factors affecting headache in Turkish schoolchildren. *Pediatr. Int.* 2005;47(3):316-22
21. Juang KD, Wang SJ, Fuh JL, et al. Association between adolescent chronic daily headache and childhood adversity: a community-based study. *Cephalalgia* 2004;24(1):54-9
22. Hensley L, Varela RE. PTSD symptoms and somatic complaints following Hurricane Katrina: the roles of trait anxiety and anxiety sensitivity. *J Clin Child Adolesc Psychol* 2008;37(3):542-52
23. Fuh JL, Wang SJ, Juang KD, et al. Relationship between childhood physical maltreatment and migraine in adolescents. *Headache* 2010;50(5):761-8
24. Zafar M, Kashikar-Zuck SM, Slater SK, et al. Childhood abuse in pediatric patients with chronic daily headache. *Clin. Pediatr. (Phila)*. 2012;51(6):590-3
25. Luntamo T, Sourander A, Rihko M, et al. Psychosocial determinants of headache, abdominal pain, and sleep problems in a community sample of Finnish adolescents. *Eur. Child Adolesc. Psychiatry* 2012;21(6):301-13
26. Anda R, Tietjen G, Schulman E, et al. Adverse childhood experiences and frequent headaches in adults. *Headache* 2010;50(9):1473-81
27. Tietjen GE, Brandes JL, Peterlin BL, et al. Childhood maltreatment and migraine (part I). Prevalence and adult revictimization: a multicenter headache clinic survey. *Headache* 2010;50(1):20-31
28. Norman RE, Byambaa M, De R, et al. The long-term health consequences of child physical abuse, emotional abuse, and neglect: a systematic review and meta-analysis. *PLoS Med* 2012;9(11):e1001349

29. Ford JD, Elhai JD, Connor DF, et al. Poly-victimization and risk of posttraumatic, depressive, and substance use disorders and involvement in delinquency in a national sample of adolescents. *J. Adolesc. Health* 2010;46(6):545-52
30. McLaughlin K, Greif Green J, Gruber MJ, et al. Childhood adversities and first onset of psychiatric disorders in a national sample of us adolescents. *Arch. Gen. Psychiatry* 2012;69(11):1151-60
31. Zinzow HM, Ruggiero KJ, Resnick H, et al. Prevalence and mental health correlates of witnessed parental and community violence in a national sample of adolescents. *Journal of Child Psychology and Psychiatry* 2009;50(4):441-50
32. Fisher HL, Moffitt TE, Houts RM, et al. Bullying victimisation and risk of self harm in early adolescence: longitudinal cohort study. *BMJ* 2012;344:e2683
33. Finkelhor D, Ormrod RK, Turner HA. Lifetime assessment of poly-victimization in a national sample of children and youth. *Child Abuse Negl.* 2009;33(7):403-11
34. Jonson-Reid M, Kohl PL, Drake B. Child and adult outcomes of chronic child maltreatment. *Pediatrics* 2012;129(5):839-45
35. Copeland WE, Keeler G, Angold A, et al. Traumatic events and posttraumatic stress in childhood. *Arch. Gen. Psychiatry* 2007;64(5):577-84
36. Neuner F, Schauer M, Karunakara U, et al. Psychological trauma and evidence for enhanced vulnerability for posttraumatic stress disorder through previous trauma among West Nile refugees. *BMC Psychiatry* 2004;4:34
37. Tolin DF, Foa EB. Sex differences in trauma and posttraumatic stress disorder: a quantitative review of 25 years of research. *Psychol. Bull.* 2006;132(6):959-92
38. Modgill G, Jette N, Wang JL, et al. A population-based longitudinal community study of major depression and migraine. *Headache* 2012;52(3):422-32
39. Holmen TL, Bratberg G, Krokstad S, et al. Cohort profile of the Young-HUNT Study, Norway: A population-based study of adolescents. *Int. J. Epidemiol.* 2013 doi: 10.1093/ije/dys232[published Online First: Epub Date]].
40. Zwart JA, Dyb G, Stovner LJ, et al. The validity of 'recognition-based' headache diagnoses in adolescents. Data from the Nord-Trøndelag Health Study 1995-97, Head-HUNT-Youth. *Cephalalgia* 2003;23(3):223-9
41. Tambs K, Moum T. How well can a few questionnaire items indicate anxiety and depression? *Acta Psychiatr. Scand.* 1993;87(5):364-7
42. Strand BH, Dalgard OS, Tambs K, et al. Measuring the mental health status of the Norwegian population: a comparison of the instruments SCL-25, SCL-10, SCL-5 and MHI-5 (SF-36). *Nord J Psychiatry* 2003;57(2):113-8
43. Rodriguez N, Steinberg A, Pynoos RS. UCLAs PTSD-index for DSM IV (revision 1). UCLA Trauma Psychiatry Service, 1999.
44. Kenny DA. Mediation. *Secondary Mediation* 2012.
45. Efron B, Tibshirani RJ. *An Introduction to the Bootstrap*. Monographs on Statistics and Applied Probability 57: Chapman and Hall/CRC, 1994.
46. Kessler RC, Avenevoli S, McLaughlin KA, et al. Lifetime co-morbidity of DSM-IV disorders in the US national comorbidity survey replication adolescent supplement (NCS-A). *Psychol. Med.* 2012;42(9):1997-2010
47. De Ridder KA, Pape K, Johnsen R, et al. School dropout: a major public health challenge: a 10-year prospective study on medical and non-medical social insurance benefits in young adulthood, the Young-HUNT 1 Study (Norway). *J. Epidemiol. Community Health* 2012
48. Scott-Storey K. Cumulative Abuse: Do Things Add Up? An Evaluation of the Conceptualization, Operationalization, and Methodological Approaches in the Study of the Phenomenon of Cumulative Abuse. *Trauma, violence & abuse* 2011 doi: 10.1177/1524838011404253[published Online First: Epub Date]].
49. Nixon CL, Linkie CA, Coleman PK, et al. Peer relational victimization and somatic complaints during adolescence. *J. Adolesc. Health* 2011;49(3):294-9
50. Suzuki K, Asaga R, Sourander A, et al. Cyberbullying and adolescent mental health. *Int J Adolesc Med Health* 2012;24(1):27-35 doi: 10.1515/ijamh.2012.005[published Online First: Epub Date]].
51. Zwart JA, Dyb G, Holmen TL, et al. The prevalence of migraine and tension-type headaches among adolescents in Norway. The Nord-Trøndelag Health Study (Head-HUNT-Youth), a large population-based epidemiological study. *Cephalalgia* 2004;24(5):373-9
52. Bonomi AE, Cannon EA, Anderson ML, et al. Association between self-reported health and physical and/or sexual abuse experienced before age 18. *Child Abuse Negl.* 2008;32(7):693-701
53. Gerber MR, Fried LE, Pineles SL, et al. Posttraumatic Stress Disorder and Intimate Partner Violence in a Women's Headache Center. *Women Health* 2012;52(5):454-71
54. Audi CA, Segall-Corrêa AM, Santiago SM, et al. Adverse health events associated with domestic violence during pregnancy among Brazilian women. *Midwifery* 2012;28(4):416-21

- 1  
2  
3  
4  
5  
6  
7  
8  
9  
10  
11  
12  
13  
14  
15  
16  
17  
18  
19  
20  
21  
22  
23  
24  
25  
26  
27  
28  
29  
30  
31  
32  
33  
34  
35  
36  
37  
38  
39  
40  
41  
42  
43  
44  
45  
46  
47  
48  
49  
50  
51  
52  
53  
54  
55  
56  
57  
58  
59  
60
55. Rigby K. Peer victimisation at school and the health of secondary school students. *Br. J. Educ. Psychol.* 1999;69 ( Pt 1):95-104
56. Fekkes M, Pijpers FI, Fredriks AM, et al. Do bullied children get ill, or do ill children get bullied? A prospective cohort study on the relationship between bullying and health-related symptoms. *Pediatrics* 2006;117(5):1568-74
57. Tietjen GE, Brandes JL, Peterlin BL, et al. Childhood maltreatment and migraine (part III). Association with comorbid pain conditions. *Headache* 2010;50(1):42-51
58. Danese A, McEwen BS. Adverse childhood experiences, allostasis, allostatic load, and age-related disease. *Physiol. Behav.* 2012;106(1):29-39
59. Macdonald G, Leary MR. Why does social exclusion hurt? The relationship between social and physical pain. *Psychol. Bull.* 2005;131(2):202-23
60. Costello EJ, Erkanli A, Fairbank JA, et al. The prevalence of potentially traumatic events in childhood and adolescence. *J. Trauma. Stress* 2002;15(2):99-112
61. Rutter M, Caspi A, Moffitt TE. Using sex differences in psychopathology to study causal mechanisms: unifying issues and research strategies. *Journal of Child Psychology and Psychiatry* 2003;44(8):1092-115
62. Asmundson GJG, Katz J. Understanding the co-occurrence of anxiety disorders and chronic pain: state-of-the-art. *Depress. Anxiety* 2009;26(10):888-901
63. Pynoos RS, Steinberg AM, Piacentini JC. A developmental psychopathology model of childhood traumatic stress and intersection with anxiety disorders. *Biol. Psychiatry* 1999;46(11):1542-54
64. Seshia SS, Phillips DF, von Baeyer CL. Childhood chronic daily headache: a biopsychosocial perspective. *Dev. Med. Child Neurol.* 2008;50(7):541-5 doi: 10.1111/j.1469-8749.2008.03013.x[published Online First: Epub Date]].
65. Shonkoff JP, Boyce WT, S. MB. Neuroscience, molecular biology, and the childhood roots of health disparities: Building a new framework for health promotion and disease prevention. *JAMA: The Journal of the American Medical Association* 2009;301(21):2252-59
66. Russ S, Garro N, Halfon N. Meeting children's basic health needs: From patchwork to tapestry. *Child Youth Serv Rev* 2010;32(9):1149-64
67. Goodman A, Joyce R, Smith JP. The long shadow cast by childhood physical and mental problems on adult life. *Proc. Natl. Acad. Sci. U. S. A.* 2011;108(15):6032-7

1  
2  
3  
4  
5  
6  
7  
8  
9  
10  
11  
12  
13  
14  
15  
16  
17  
18  
19  
20  
21  
22  
23  
24  
25  
26  
27  
28  
29  
30  
31  
32  
33  
34  
35  
36  
37  
38  
39  
40  
41  
42  
43  
44  
45  
46  
47  
48  
49  
50  
51  
52  
53  
54  
55  
56  
57  
58  
59  
60

# Potentially Traumatic Interpersonal Events, Psychological Distress and Recurrent Headaches in a Population-based Cohort of Adolescents

~~A population-based study~~

The HUNT Study

Synne Øien- Stensland, Grete Dyb, Siri Thoresen, Tore Wentzel-Larsen, John-Anker Zwart

Norwegian Centre for Violence and Traumatic Stress Studies, Kirkeveien 166, bygning 48, 0450 Oslo, Norway

(Synne Øien- Stensland MD, Grete Dyb MD PhD Researcher II, Siri Thoresen ~~pH~~PhD Researcher II and Tore Wentzel-Larsen Cand.Real Statistician), Faculty of Medicine, University of Oslo, Postboks 1078, Blindern, 0316

Oslo, Norway (Synne Øien- Stensland PhD candidate, Grete Dyb MD PhD Associate Professor and John-Anker Zwart MD PhD Professor), Centre for Child and Adolescent Mental Health, Eastern and Southern Norway,

Postboks 4623 Nydalen, 0405 Oslo, Norway (Tore Wentzel-Larsen Statistician), Department of

Neurology/FORMI, Ullevål sykehus, Oslo University Hospital, Postboks 4956 Nydalen, 0424 Oslo (John-Anker

Zwart MD PhD Professor)

Correspondence to: Synne Øien Stensland, [synne.stensland@nkvts.unirand.no](mailto:synne.stensland@nkvts.unirand.no) Norwegian Centre for Violence and Traumatic Stress Studies, Kirkeveien 166, bygning 48, 0450 Oslo, Norway (mail address may be published),

Tel: +47 22 59 55 00/ + 47 90 55 80 09, Fax: +47 22 59 55 01

**Key words (MeSH):** Adolescent, Crime, Bullying, Mental disorders, Headache disorders, (Public

Health)

**WORD ~~COUNT~~ AND COUNT AND TABLES**

Text only: ~~3918~~3948 words

Field Code Changed

1

1  
2  
3  
4  
5  
6  
7  
8  
9  
10  
11  
12  
13  
14  
15  
16  
17  
18  
19  
20  
21  
22  
23  
24  
25  
26  
27  
28  
29  
30  
31  
32  
33  
34  
35  
36  
37  
38  
39  
40  
41  
42  
43  
44  
45  
46  
47  
48  
49  
50  
51  
52  
53  
54  
55  
56  
57  
58  
59  
60

Abstract: ~~300-291~~ words

Tables: ~~4 (+ 2 additional for online publication only (A1 and A2))~~5

Image: Flowchart attached as supplementary file

For peer review only



## ARTICLE SUMMARY

### Article Focus

- The main focus was to examine, in a population-based cohort of adolescents, the associations between exposure to potentially traumatic interpersonal events (PTIEs) and migraine and tension-type headaches, meeting the International Classification of Headache Disorders (ICHD-II) criteria.
- The present study was designed to acquire knowledge of associations between exposure to potentially traumatic interpersonal events and clinically validated measures of the range of recurrent headache disorders experienced in a population-based cohort of adolescents, meeting the criteria of the International Classification of Headache Disorder (ICHD-II).
- Possible mediation through Further, we aimed to assess the impact of psychological distress on the relationship between PTIEs and recurrent headache. psychological distress was tested specifically.

### Key Messages

- Our study suggests a strong and consistent relationship between exposure to potentially traumatic interpersonal events (PTIEs), and prevalence of ICHD-II defined migraine and tension-type headache, in a population-based cohort study of adolescents.
- Exposure to increasing numbers of types of PTIEs was consistently associated with higher prevalence of all assessed subtypes and frequencies of headache, indicating a dose-response relationship.
- Adolescents exposed to PTIEs, reported higher levels of psychological distress than their non-victimized peers. Further, adjustment for experienced psychological

1  
2  
3  
4  
5  
6  
7 distress consistently, and significantly, attenuated strength of associations between  
8 PTIEs and recurrent headache. Our study suggests a strong, consistent and  
9 cumulative relationship between exposure to increasing number of types of  
10 interpersonal trauma and recurrent headache, regardless of subtype or frequency of  
11 complaints, classified according to the ICHD-II criteria.

- 12  
13  
14  
15  
16  
17 ● This study indicates that traumatized adolescents experience higher levels of  
18 psychological distress than their non-victimized peers, which in turn seem to enhance  
19 their susceptibility to chronification of all common recurrent headache disorders.  
20 Thus psychological distress may play an important mediating role on the pathway  
21 linking victimization to recurrent headache complaints.
- 22  
23  
24  
25  
26  
27 ● Although prospective studies are needed the observed dependency between  
28 interpersonal trauma exposure and highly prevalent psychological and somatic  
29 conditions in adolescence challenges the traditional dichotomization of health  
30 services.

### 35 Strengths and Limitations

- 36  
37 ● The strengths of this study were the large sample size, the overall high participation  
38 rate, the use of a validated headache interview, based upon the ICHD (II) criteria, and  
39 the opportunity to assess the impact of several types multiple potentially traumatic  
40 interpersonal events of victimization and confounding factors, within a population-  
41 based cohort of adolescents.
- 42  
43 ● The retrospective, cross-sectional study-design does not allow for causal inference,  
44 did not allow for causal inference, or differentiation between mediational and  
45 confounding effects. ~~And~~ findings should ~~thus~~ be interpreted within the given  
46 constraints of the study.

1  
2  
3  
4  
5  
6  
7  
8  
9  
10  
11  
12  
13  
14  
15  
16  
17  
18  
19  
20  
21  
22  
23  
24  
25  
26  
27  
28  
29  
30  
31  
32  
33  
34  
35  
36  
37  
38  
39  
40  
41  
42  
43  
44  
45  
46  
47  
48  
49  
50  
51  
52  
53  
54  
55  
56  
57  
58  
59  
60

|

|

For peer review only

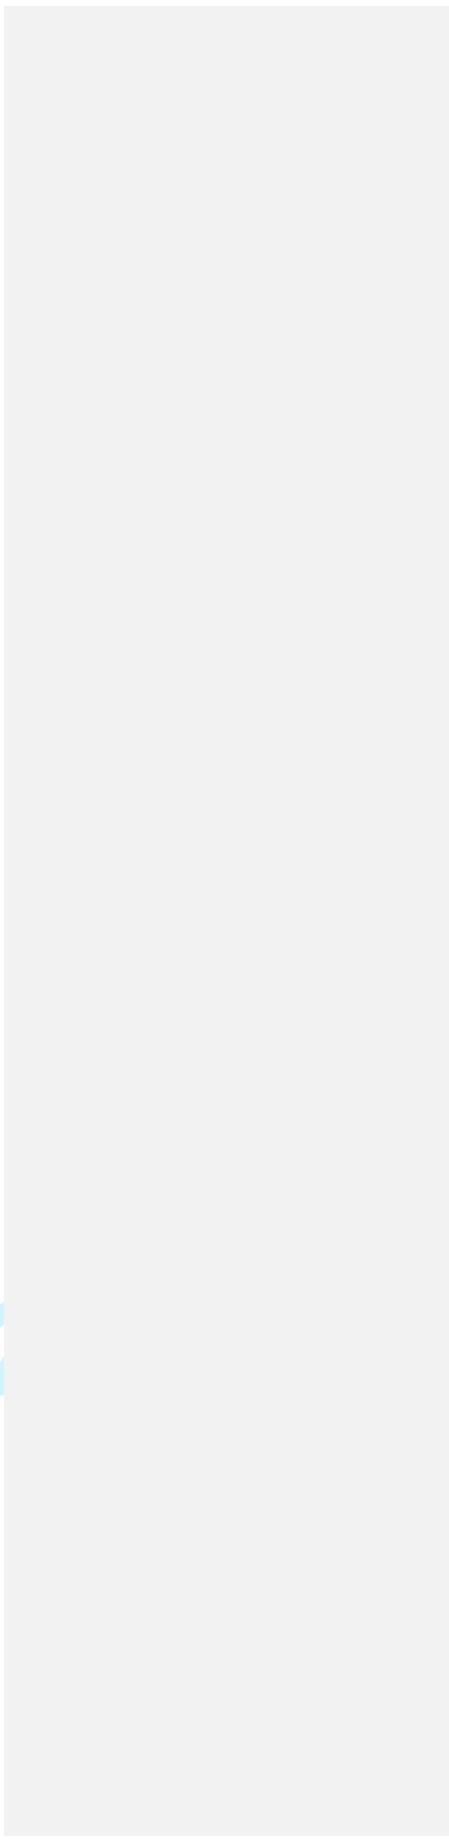

**ABSTRACT**

**Context** Recurrent headache, headache co-occurs commonly with psychological distress, such as anxiety or depression. Potentially traumatic interpersonal events (PTIEs) could represent important precursors of posttraumatic both psychological distress and recurrent headache in adolescents.

**Objective** To assess the hypothesized association between exposure to potentially traumatic interpersonal events (PTIEs) and recurrent migraine and tension-type headache in across the spectrum of headache complaints experienced by adolescents, and and further examine the potential potential impact of role of psychological distress as a mediator of on this relationship.

**Design** The Young-HUNT 3 study, 2006–2008, is a population-based, cross-sectional, cohort study of Norwegian youth that includes self-report data on exposure to potentially traumatic exposure events, psychological distress, and a validated interview on headache.

**Setting and Participants** A cohort of 10 464 adolescents aged 12–20 years from the Nord-Trøndelag county were invited to participate.

**Main Outcome Measures** Data from the headache interview served as outcome. Recurrent headache was defined as headache recurring at least monthly during the past year, and was further subclassified sub classified into monthly, weekly, and daily complaints. Subtypes were classified as tension-type headache (TTH), migraine, migraine with tension-type headache TTH and/or 'other' non-classifiable headache, in accordance with the International Classification of Headache Disorders, (ICHD-II).

**Results** The response rate was 73% (7 620). Multiple logistic regression analysis, adjusted for sociodemographics, showed consistently significant associations between exposure to PTIEs

1  
2  
3  
4  
5  
6  
7  
8  
9  
10  
11  
12  
13  
14  
15  
16  
17  
18  
19  
20  
21  
22  
23  
24  
25  
26  
27  
28  
29  
30  
31  
32  
33  
34  
35  
36  
37  
38  
39  
40  
41  
42  
43  
44  
45  
46  
47  
48  
49  
50  
51  
52  
53  
54  
55  
56  
57  
58  
59  
60

~~and recurrent headache, regardless of frequency or subtype of headache. a steady trend of increasing odds for recurrent headache with increasing exposure to PTIEs was associated with higher prevalence of recurrent headache, indicating a dose response relationship. The same pattern was reproduced for all frequencies and subtypes of complaints. The direct strength of associations between exposure to PTIEs and all recurrent headache disorders significantly decreased after the hypothesized mediator, attenuated when psychological distress, was entered into the regression equation. Bootstrap confidence intervals for the magnitude of the attenuation in odds ratio indicated a significant decrease, suggesting mediation by psychological distress.~~

**Conclusions** The empirical evidence of a strong, ~~and~~ cumulative relationship between ~~victimization exposure to PTIEs, psychological distress~~ and recurrent headache, ~~possibly mediated by posttraumatic psychological distress,~~ indicates a need for integration of somatic and psychological health-care ~~services of for~~ adolescents, in prevention, assessment, and treatment of recurrent headache. Prospective studies are needed.

1  
2  
3  
4  
5  
6  
7 Recurrent headache is the most common pain condition during adolescence, and associated  
8  
9 with limitations in everyday life, affecting school functioning and relationships with family  
10  
11 and peers.<sup>[1 2]</sup> ~~Prepubertal onset of headache, high pain intensity, migraine, and co-~~  
12  
13 ~~occurring psychological distress is related to chronification and disability, in childhood and~~  
14  
15 ~~adolescence.~~<sup>[1 3 4]</sup> ~~Further, headache-related disability at diagnosis seems to be predictive~~  
16  
17 ~~of headache-related functional impairment decades later.~~<sup>[5]</sup>  
18  
19 ~~Prepubertal onset of headache and severe, frequent or persistent complaints, migraine, and~~  
20  
21 ~~co-occurring psychological distress are related to chronification and enduring disability, with~~  
22  
23 ~~headache complaints and functional impairment often persisting into adulthood.~~ From early  
24  
25 childhood to adolescence there is a marked increase in the prevalence of headache, which is  
26  
27 accompanied by an emerging discrepancy between genders. ~~with P~~prevalence ~~tend to~~  
28  
29 ~~stabilizing stabilize~~ in boys, and ~~increasing increase~~ gradually throughout adolescence in  
30  
31 girls.<sup>[6]</sup>

32  
33 Primary tension-type and migraine headaches are by far the most frequent subtypes  
34  
35 of recurrent headache in adolescence.<sup>[6]</sup> Secondary headache disorders are related to other  
36  
37 conditions, such as medication overuse,<sup>[7]</sup> infection, or trauma, although these partly  
38  
39 overlap with the preceding.<sup>[8]</sup> The etiological ~~factors, and~~ pathways leading to onset and  
40  
41 chronification of headache disorders, are largely unknown,<sup>[9]</sup> yet recognized as  
42  
43 multifactorial, including: heredity, age and sex, somatic, psychological and behavioural  
44  
45 disorders,<sup>[10 11]</sup> head injuries,<sup>[12]</sup> unfavourable lifestyle (such as smoking, inactivity,<sup>[13]</sup>  
46  
47 and inadequacy of sleep<sup>[1]</sup>), and lack of social and economic resources within families, in  
48  
49 schools and societies.<sup>[14-16]</sup> Despite distinguishing features related to migraine headaches,  
50  
51 the primary headaches may in part share pathophysiological mechanisms, related to the  
52  
53 chronification of disorders,<sup>[9 17]</sup> reflected in an observed continuum of clinical severity.

Field Code Changed

1  
2  
3  
4  
5  
6 ranging from tension-type complaints, through migraine,[18] to combined migraine with  
7  
8 tension-type headache.[19]  
9

Field Code Changed

Field Code Changed

10  
11 Recently researchers have explored the potential role of negative life events on the  
12 development of psychosomatic outcomes, including headache, in adolescence. Positive  
13 associations have been found between a range of childhood adversities and headache,  
14 including: economic hardship,[16] parental separation,[20] poor family environment or  
15 neglect,[21] and potentially traumatic events such as disaster,[22] exposure to abuse [23 24],  
16 and bullying.[25] A recent population-based study of adolescents has suggested a dose-  
17 response relationship between frequency of childhood physical abuse and severe  
18 headaches, including migraine,[23] supported by findings from a large convenience sample  
19 study of adults,[26] -and a ~~multicenter~~multicentre study of adult migraineurs, alike.[27]  
20  
21 Despite these suggestive findings the evidence for an association between exposure to  
22 childhood trauma and recurrent headache is currently debated.[28]  
23  
24  
25  
26  
27  
28  
29  
30  
31  
32  
33  
34

Field Code Changed

35 The association between adverse experiences and mood and anxiety disorders in  
36 adolescents, on the other hand, is thoroughly documented.[29] Exposure to ~~severe family~~  
37 ~~adversity, or potentially traumatic~~ interpersonal ~~traumatic~~ events (PTIEs), especially early  
38 exposure to abuse, ~~or neglect~~ ~~or severe family adversity~~,[30] witnessing domestic  
39 violence,[31] exposure to bullying[32] or sexually-related victimization,[33] is recognized as  
40 particularly detrimental, and associated with prolonged trajectories and comorbidity.[25 34]  
41  
42 A steady aggravation of psychological distress is further documented in relation to ~~multiple~~  
43 ~~victimization~~exposure to multiple types of PTIEs,[35] with findings Findings from high-  
44 exposure populations suggest~~ing~~ that ~~cumulative traumatic~~ exposure to PTIEs will,  
45 regardless of psychological vulnerability, lead to psychological distress of clinical significance  
46  
47  
48  
49  
50  
51  
52  
53  
54

Field Code Changed

in anyone, although thresholds vary individually.[34 36] These main trends seem to be similar for both sexes.[37]

Field Code Changed  
Field Code Changed  
Field Code Changed

~~During childhood PTIE-Trauma~~ exposure is generally evenly ~~distributed~~ distributed in childhood, with, followed by emerging sex-related discrepancies in ~~trauma-patterns of distribution of PTIEs profiles gradually emerging throughout during~~ adolescence. ~~Adolescent~~as girls continuously experience more sexually-related and ~~close network~~close-network traumasPTIEs, whilst boys get gradually more exposed to all other types of single ~~traumatic event~~events. Generally, ~~trauma associated psychological distress, is~~ Posttraumatic stress reactions are generally reported 2-3 times more often ~~reported~~ by adolescent girls, in comparison to boys.[37]

Field Code Changed

~~Thus, e~~Current epidemiological evidence of a gradual increase in risk of exposure to ~~traumatic events~~PTIEs throughout childhood and adolescence,[33] strongly associated with onset of psychological distress,[30] which again often co-occurs with emerging recurrent headache complaints,[4] imply possible shared causal pathways.[38] ~~Simply put, when adolescents experience something traumatic they get distressed. Further, psychological distress may function as an internal stressor, increasing individual susceptibility to onset and chronification of headache complaints. Thus, mental distress may be an important mediator on the pathway linking trauma to recurrent headache complaints.~~

Field Code Changed  
Field Code Changed

~~We therefore need to study associations between the exposure to PTIEs, psychological distress and recurrent headache in adolescents. Although scientific interest in the associations between exposure to traumatic experiences and headache in adolescents has grown recently, we still lack substantiated insight into whether and eventually how exposure to traumatic events might relate to recurrent headache experienced in the general~~



1  
2  
3  
4  
5  
6  
7  
8  
9  
10  
11  
12  
13  
14  
15  
16  
17  
18  
19  
20  
21  
22  
23  
24  
25  
26  
27  
28  
29  
30  
31  
32  
33  
34  
35  
36  
37  
38  
39  
40  
41  
42  
43  
44  
45  
46  
47  
48  
49  
50  
51  
52  
53  
54  
55  
56  
57  
58  
59  
60

~~population.~~<sup>[28]</sup> ~~Therefore, the~~The present study was designed to acquire knowledge of  
associations between exposure to ~~potentially traumatic interpersonal events~~PTIEs and ~~ICHD-~~  
~~II defined migraine and tension-type headache, clinically validated measures of the range of~~  
~~recurrent headaches experienced~~in a population-based cohort of adolescents, ~~meeting the~~  
~~International Classification of Headache Disorder criterias (ICHD-II). Possible mediation~~  
~~through~~ The impact of psychological distress upon the relationship between exposure to  
PTIEs and recurrent headache was tested specifically.

Field Code Changed  
Field Code Changed

For peer review only

## METHODS

~~The Young-HUNT 3 Study, From 2006 until 2008, 10464 adolescents were invited to~~

~~participate in Young-HUNT 3 (<http://www.ntnu.edu/hunt/inenglish>), which~~ is a population-

based, cross-sectional cohort-study of Norwegian youth in Nord-Trøndelag county,

~~conducted between 2006 and 2008, in which 10464 adolescents were invited to~~

~~participate.~~<sup>[39]</sup> The study, which comprises a general health questionnaire, a clinical

assessment, and a headache interview, was approved by the Norwegian Regional Committee

for Medical and Health Research Ethics. Inclusion was based upon written consent from

participants aged 16 years and older and from parents for those under 16, in accordance

with Norwegian law.

### Participants

In 2006 there were 128 694 inhabitants in Nord-Trøndelag. Over 95% were ethnic

Norwegians, the work force was generally well-educated and unemployment was less than

3%. All adolescents (~~10 464~~) in the county, within an age-range qualifying for attendance in

junior or senior high-school, were invited to the study. Of the 10 464 invited adolescents,

5614 were students in junior high, 4357 in senior high, and 493 adolescents were not in

school. Most adolescents were from 13 through 18 years old, although age ranged from 12-

20. Non-participation was mainly ~~due to absence from school~~ due to lack of enrolment,

absenteeism, or participation in class activities outside school, ~~or not wanting to participate.~~

In total 8200 (78%) adolescents completed the general health questionnaire; more

specifically 85% (4749) of the junior high students, 77% (3336) of the senior high students

and 23% (115) of the adolescents not in school. Further, a total of 73% (7620) also

completed the interview on headache.

Field Code Changed

Field Code Changed

1  
2  
3  
4  
5  
6  
7 During a school lesson, students completed a self-administered questionnaire containing  
8 over 100 health- and lifestyle-related questions, including items on potentially traumatic  
9 events, psychological distress, and posttraumatic stress reactions, in addition to background  
10 information on family structure and family economy [http://www.ntnu.edu/hunt/data/que].  
11

12  
13  
14 ~~A validated semi-structured clinical interview was conducted in association with a clinical~~  
15 ~~examination. Within 1 month of completion of the questionnaire, a validated semi-~~  
16 ~~structured clinical headache interview was conducted to assess adolescents' recurring~~  
17 ~~headache complaints according to type and frequency.~~ [40]  
18  
19  
20  
21  
22

Field Code Changed

#### 23 24 25 26 Recurrent Headache

27  
28 All adolescents were asked if they had experienced recurring headache not caused by a cold  
29 (infection) or illness within the past 12 months. 'Yes' responders were read two descriptive  
30 texts of prototypic complaints for tension-type ~~headache-headache (TTH)~~ and migraine, ~~in~~  
31 ~~accordance with the International Classification of Headache Disorders criteria, second~~  
32 ~~edition (ICHD-II), and They~~ were asked if they recognized either, both or neither descriptions  
33 as resembling their own complaints. Thus, the interview differentiated between three types  
34 of headache: tension-type and/or migraine ~~(with or without visual aura)~~ and/or ~~'other non-~~  
35 ~~classifiable type of~~ headache. The frequency of recurrent headache was labeled as monthly  
36 (1–3 days/month), weekly (1–4 days/week), and daily (> 4 days/week). Adolescents  
37 reporting 'no recurrent headache' and ~~complaints-headache~~ less than monthly' were  
38 defined as having 'no recurrent headache', whereas all other headache frequencies were  
39 referred to as 'recurrent headache'. [42] ~~This recognition-based headache assessment has~~  
40 ~~previously been validated against extensive semi-structured interviews by neurologists,~~ [40]  
41  
42  
43  
44  
45  
46  
47  
48  
49  
50  
51  
52  
53  
54  
55

1  
2  
3  
4  
5  
6  
7 in accordance with the International Classification of Headache Disorders criteria, second  
8 edition (ICHD-II).[8]  
9

### 10 11 **Sociodemography**

12  
13  
14 Information on sex was drawn from the Norwegian National Population Registry, whereas  
15 age was calculated by subtracting the date of birth from the date of completion of the  
16 questionnaire. The socio-demographic variable 'family structure' was computed from 12  
17 self-reported items on cohabitants, and was dichotomized into 'living with both parents'  
18 versus 'other' family structures, such as: living with a single parent, stepparents, foster  
19 parents, or without guardians.[20 33] The variable 'family economy', based upon a self-  
20 reported estimation of family affordance in comparison with most others, categorized as  
21 'above average', 'average' and 'below average', represented the socioeconomic situation, as  
22 inequalities in family affluence has previously been shown to be strongly related to  
23 inequalities in adolescent health.[16]  
24  
25  
26  
27  
28  
29  
30  
31  
32  
33

Field Code Changed

Field Code Changed

Field Code Changed

### 34 35 **Potentially Traumatic Interpersonal Events**

36  
37  
38 In this study potentially traumatic interpersonal events (PTIEs) were defined as social  
39 interactions where an individual is subjected to intentional threats, use of physical force or  
40 power, that may cause immediate or long-term adverse health outcomes. Exposure  
41 encompasses both direct and indirect (witnessing) subjection to PTIEs. A number of  
42 potentially traumatic events were screened for, among which we identified 5 items as being  
43 potentially traumatic interpersonal events (PTIEs), ~~or victimizations~~. The items were  
44 introduced using the following question: Have you ever experienced any of these events?  
45  
46 Select one of the following response options: 'No', 'Yes, during the past year', or 'Yes, during  
47 lifetime'. The PTIE-related questions in our study were formulated as follows: i) Been  
48  
49  
50  
51  
52  
53  
54  
55

1  
2  
3  
4  
5  
6  
7 subjected to violence (beaten or injured), ii) Seen others being subjected to violence, iii)  
8  
9 Been subjected to unpleasant/disagreeable sexual acts by someone approximately your own  
10  
11 age, iv) Been subjected to unpleasant/disagreeable sexual acts by an adult, and v) Been  
12  
13 threatened or physically harassed by fellow students at school over a period of time. These  
14  
15 items were dichotomized into 'No, not experienced' and 'Yes, during lifetime' (combining  
16  
17 the two original 'yes' categories).

### 18 Psychological Distress

19  
20  
21 General psychological distress was measured by a five item, short-version instrument,  
22  
23 named SCL-5, modified from the [25 item Hopkins's Hopkins's Symptom Checklist \(HSCL\)](#)  
24  
25 [subscale on anxiety and depression, where every item was](#) measured on a four-point Likert  
26  
27 scale.<sup>[41]</sup> The derived items were introduced as follows: "Below is a list of some problems  
28  
29 and complaints. Have you been bothered by any of this during the last 14 days? (Select one  
30  
31 alternative: 1 = 'not bothered', 2 = 'a little bothered', 3 = 'quite bothered', and 4 = 'very  
32  
33 bothered') 'Been constantly afraid or anxious', 'Felt tense, -distressed or restless', 'Felt  
34  
35 hopeless when you think about the future', 'Felt dejected or sad' and 'Worried too much  
36  
37 about different things?'. A mean score ranging from 1 to 4 was computed. SCL-5 has  
38  
39 previously been validated as a screening instrument for mental illness or psychological  
40  
41 distress.<sup>[42]</sup>

42  
43  
44  
45 Adolescents reporting one or more PTIEs were asked three yes/no questions on  
46  
47 posttraumatic stress reactions, derived from the child version of the UCLA PTSD index for  
48  
49 DSM-IV,<sup>[43]</sup> where two items measured current intrusion or [reexperiencere-experience](#), and  
50  
51 one measured current avoidance.

### 52 STATISTICS

1  
2  
3  
4  
5  
6  
7 Descriptive data were presented according to frequency of recurrent headache  
8 complaints (Table 1). Adjusted odds ratios (ORs) and 95% confidence intervals (CIs) were  
9 obtained from logistic regression models that estimated the likelihood of experiencing  
10 recurrent headache according to each of the four categories of exposure to PTIEs within a  
11 complete case sample of 6787/10464 (65%) adolescents (regression Model 1, Tables 2, 3  
12 and 4 and 5).<sup>[44]</sup> The number of types of event PTIEs was summed for each respondent  
13 (sum of PTIEs; range, 0–5), and PTIE scores of 3, 4, or 5 were combined in one category ( $\geq 3$ ).  
14 All models included age, sex, family structure, and family economy as covariates, based on a  
15 priori reasoning. The main analysis of general recurrent headache was stratified according to  
16 sex (Table 2).

17  
18  
19  
20  
21  
22  
23  
24  
25  
26  
27 Furthermore, we tested mediation by whether adjustment for psychological distress  
28 significantly altered the estimated strength of associations between PTIEs and recurrent  
29 headache. The magnitude and significance of the alteration in ORs was assessed by  
30 bootstrapping, a general procedure for computing confidence intervals without making  
31 distributional assumptions.<sup>[45]</sup> psychological distress. A significant attenuation of the  
32 effect size estimate (OR) for the association between exposure to PTIEs and recurrent  
33 headache, when adding psychological distress to the multivariate logistic regression model  
34 (regression Model 2 in Tables 2, 3, 4 and 5), may imply a mediating role by psychological  
35 distress.<sup>[44]</sup> Specifically we used bootstrap methods with 10 000 replicated samples to  
36 calculate bootstrap percentile 95% CIs for the difference in ratio between ORs, ORs between  
37 in the two models ( $1 - (\text{odds ratio from Model 2 (OR}_2)/\text{odds ratio from Model 1 (OR}_1)$ ).  
38 Bootstrap estimated c Confidence intervals not including 1 indicated a significant difference  
39 between odds ratios the two models. Estimated CIs above 1 would indicate a significant  
40 strengthening of the association, whilst CIs below 1 indicated attenuation in the strength of  
41  
42  
43  
44  
45  
46  
47  
48  
49  
50  
51  
52  
53  
54

Field Code Changed

Field Code Changed

Field Code Changed

1  
2  
3  
4  
5  
6  
7  
8  
9  
10  
11  
12  
13  
14  
15  
16  
17  
18  
19  
20  
21  
22  
23  
24  
25  
26  
27  
28  
29  
30  
31  
32  
33  
34  
35  
36  
37  
38  
39  
40  
41  
42  
43  
44  
45  
46  
47  
48  
49  
50  
51  
52  
53  
54  
55  
56  
57  
58  
59  
60

the relationship between PTIEs and recurrent headache, after adjustment for psychological distress. Lack of power, due to low numbers, or measurement uncertainties, on the other hand, would make the ORs less reliable and the CIs wider, but would not make the ORs systematically closer to, or further from, the value 1.

Test of proportional odds assumptions across frequencies and subtypes of headache complaints was undertaken, but did not meet the requirement of proportionality in odds relations (supplementary tables A1 and A2 in appendix, online only). In sSupplementary logistic regression analyseis we assessed of group potential differences in strength of associations between exposure to PTIEs and monthly, weekly and daily headache, respectively. within frequencies and Followed by analysis of differences in strength of associations between PTIE exposure and headache by subtypes; TTH, migraine without TTH and migraine with TTH of recurrent headaches, in association to exposure to PTIEs and psychological distress, were assessed in separate logistic regression analyses (supplementary tables A13 and A24 in appendix, online only).

Last, we performed a subgroup, multiple regression analysis, assessing the relationship between PTIEs and recurrent headache, with and without adjustment for posttraumatic stress reactions, within of the 1740/6787 (26%) adolescents who were exposed to any PTIEs, to explore whether specific posttraumatic stress reactions served as a potential additional mediator of the relationship between trauma and recurrent headache (Table 5). Furthermore we repeated analysis, with inclusion of the measure for psychological distress (SCL-5).

Analyses were undertaken using SPSS version 20, in combination with the program R (The R Foundation for Statistical Computing, Vienna, Austria) package boot for bootstrap calculations.

1  
2  
3  
4  
5  
6  
7  
8  
9  
10  
11  
12  
13  
14  
15  
16  
17  
18  
19  
20  
21  
22  
23  
24  
25  
26  
27  
28  
29  
30  
31  
32  
33  
34  
35  
36  
37  
38  
39  
40  
41  
42  
43  
44  
45  
46  
47  
48  
49  
50  
51  
52  
53  
54  
55  
56  
57  
58  
59  
60

For peer review only

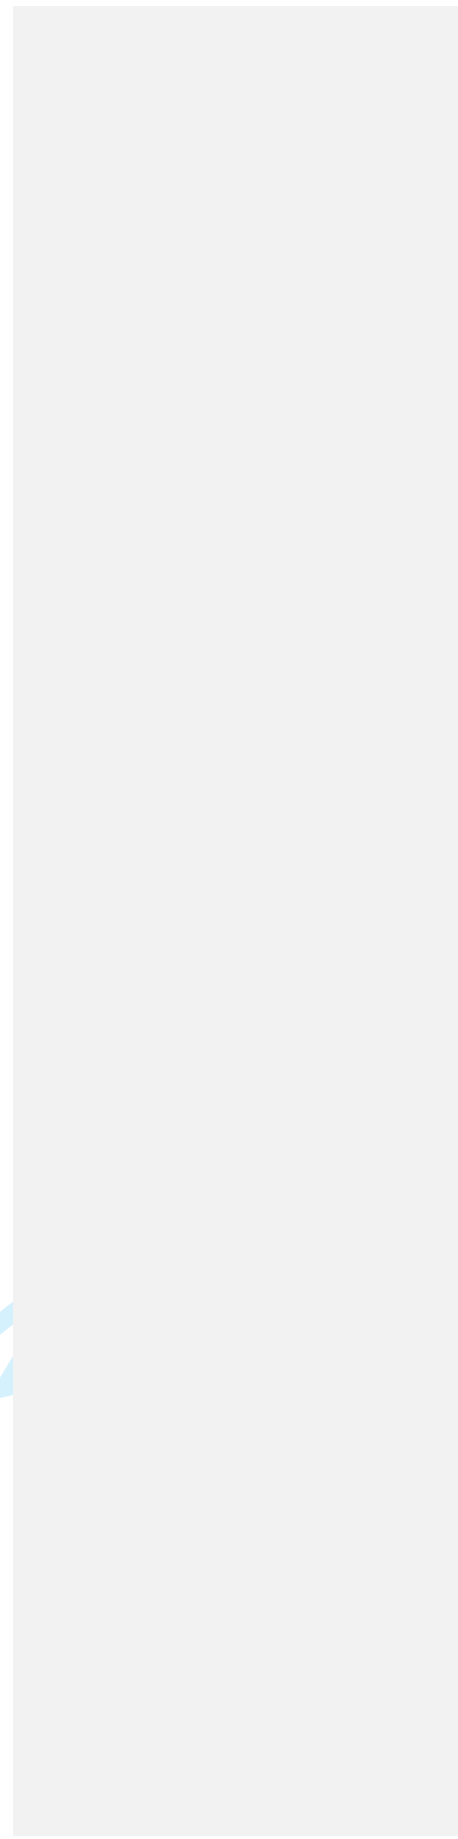

|



## RESULTS

The demographic data are displayed in Table 1.

**Table 1.** Headache Type, Sociodemographics, Exposure to PTIEs, and Psychological Distress, by Frequency of Recurrent Headache, in 7620 adolescents.\*†

| Variables             | n    | Recurrent Headache |                    |                   |                   | p value |
|-----------------------|------|--------------------|--------------------|-------------------|-------------------|---------|
|                       |      | No                 | Recurrent Headache |                   |                   |         |
|                       |      | Recurrent Headache | Monthly            | Weekly            | Daily             |         |
|                       |      | N (%) / mean (SD)  | N (%) / mean (SD)  | N (%) / mean (SD) | N (%) / mean (SD) |         |
| <b>Female</b>         |      |                    |                    |                   |                   |         |
| Headache              | 3832 | 2707 (71)          | 653 (17)           | 385 (10)          | 87 (2)            |         |
| TTH                   |      | -                  | 461 (71)           | 249 (65)          | 39 (45)           |         |
| Migraine, without TTH |      | -                  | 137 (21)           | 78 (20)           | 19 (22)           |         |
| Migraine, with TTH    |      | -                  | 24 (4)             | 43 (11)           | 22 (25)           |         |
| Non-classifiable      |      | -                  | 31 (5)             | 15 (4)            | 7 (8)             | <0.001  |
| Age, in years         | 3832 | 15.8 (1.7)         | 15.9 (1.7)         | 16.1 (1.8)        | 16.0 (1.7)        | 0.016¶  |
| Family Structure      | 3798 |                    |                    |                   |                   |         |
| Living w/both parents |      | 1819 (68)          | 396 (61)           | 216 (57)          | 42 (48)           |         |
| Other                 |      | 865 (32)           | 250 (39)           | 165 (43)          | 45 (52)           | <0.001  |
| Family Economy        | 3630 |                    |                    |                   |                   |         |
| Above average         |      | 413 (16)           | 77 (13)            | 57 (16)           | 8 (10)            |         |
| Average               |      | 1946 (76)          | 456 (75)           | 252 (69)          | 62 (73)           |         |
| Below average         |      | 215 (8)            | 74 (12)            | 55 (15)           | 15 (18)           | <0.001  |
| Sum of PTIE‡,§        | 3662 |                    |                    |                   |                   |         |
| 0                     |      | 2031 (78)          | 423 (68)           | 226 (61)          | 47 (56)           |         |
| 1                     |      | 382 (15)           | 119 (19)           | 69 (19)           | 22 (26)           |         |
| 2                     |      | 108 (4)            | 50 (8)             | 39 (11)           | 5 (6)             |         |

|                                |             |                   |                   |                   |                   |                    |
|--------------------------------|-------------|-------------------|-------------------|-------------------|-------------------|--------------------|
| <u>≥3</u>                      |             | <u>68 (3)</u>     | <u>28 (5)</u>     | <u>35 (9)</u>     | <u>10 (12)</u>    | <u>&lt;0.001  </u> |
| <u>Psychological Distress§</u> | <u>3740</u> | <u>1.6 (0.5)</u>  | <u>1.8 (0.6)</u>  | <u>2.0 (0.7)</u>  | <u>2.0 (0.7)</u>  | <u>&lt;0.001  </u> |
| <b>Male</b>                    |             |                   |                   |                   |                   |                    |
| <u>Headache</u>                | <u>3788</u> | <u>3204 (85)</u>  | <u>418 (11)</u>   | <u>145 (4)</u>    | <u>21 (1)</u>     |                    |
| <u>TTH</u>                     |             | <u>-</u>          | <u>324 (78)</u>   | <u>98 (68)</u>    | <u>13 (62)</u>    |                    |
| <u>Migraine, without TTH</u>   |             | <u>-</u>          | <u>70 (17)</u>    | <u>25 (17)</u>    | <u>2 (10)</u>     |                    |
| <u>Migraine, with TTH</u>      |             | <u>-</u>          | <u>9 (2)</u>      | <u>12 (8)</u>     | <u>4 (19)</u>     |                    |
| <u>Non-classifiable</u>        |             | <u>-</u>          | <u>15 (4)</u>     | <u>10 (7)</u>     | <u>2 (9)</u>      | <u>&lt;0.001  </u> |
| <u>Age, in years</u>           | <u>3788</u> | <u>15.8 (1.7)</u> | <u>15.7 (1.7)</u> | <u>15.7 (1.6)</u> | <u>15.8 (2.1)</u> | <u>0.596  </u>     |
| <u>Family Structure</u>        | <u>3748</u> |                   |                   |                   |                   |                    |
| <u>Living w/both parents</u>   |             | <u>2206 (70)</u>  | <u>273 (66)</u>   | <u>85 (60)</u>    | <u>12 (60)</u>    |                    |
| <u>Other</u>                   |             | <u>968 (30)</u>   | <u>139 (34)</u>   | <u>57 (40)</u>    | <u>8 (40)</u>     | <u>0.047  </u>     |
| <u>Family Economy</u>          | <u>3465</u> |                   |                   |                   |                   |                    |
| <u>Above average</u>           |             | <u>614 (21)</u>   | <u>82 (22)</u>    | <u>26 (20)</u>    | <u>0 (0)</u>      |                    |
| <u>Average</u>                 |             | <u>2107 (72)</u>  | <u>262 (69)</u>   | <u>89 (67)</u>    | <u>12 (63)</u>    |                    |
| <u>Below average</u>           |             | <u>211 (7)</u>    | <u>38 (10)</u>    | <u>17 (13)</u>    | <u>7 (37)</u>     | <u>&lt;0.001  </u> |
| <u>Sum of PTIEs‡</u>           | <u>3527</u> |                   |                   |                   |                   |                    |
| <u>0</u>                       |             | <u>2023 (68)</u>  | <u>244 (64)</u>   | <u>70 (53)</u>    | <u>9 (50)</u>     |                    |
| <u>1</u>                       |             | <u>622 (21)</u>   | <u>67 (17)</u>    | <u>31 (24)</u>    | <u>4 (22)</u>     |                    |
| <u>2</u>                       |             | <u>255 (9)</u>    | <u>49 (13)</u>    | <u>18 (14)</u>    | <u>3 (17)</u>     |                    |
| <u>≥3</u>                      |             | <u>95 (3)</u>     | <u>23 (6)</u>     | <u>12 (9)</u>     | <u>2 (11)</u>     | <u>&lt;0.001  </u> |
| <u>Psychological Distress§</u> | <u>3617</u> | <u>1.3 (0.4)</u>  | <u>1.5 (0.5)</u>  | <u>1.5 (0.6)</u>  | <u>1.9 (0.7)</u>  | <u>&lt;0.001  </u> |

Abbreviations: PTIE, Potentially Traumatic Interpersonal Event; TTH, Tension-Type headache

\* Recurrent headache is defined as headache ≥ monthly

† Because of rounding percentages may not total 100

‡ Exposure to PTIEs is measured as the sum of 5 binary variables

§ Range of possible score is 1 to 4

|| Pearson Chi square test

1  
2  
3  
4  
5  
6  
7  
8  
9  
10  
11  
12  
13  
14  
15  
16  
17  
18  
19  
20  
21  
22  
23  
24  
25  
26  
27  
28  
29  
30  
31  
32  
33  
34  
35  
36  
37  
38  
39  
40  
41  
42  
43  
44  
45  
46  
47  
48  
49  
50  
51  
52  
53  
54  
55  
56  
57  
58  
59  
60

¶ ANOVA, analysis of variance

For peer review only

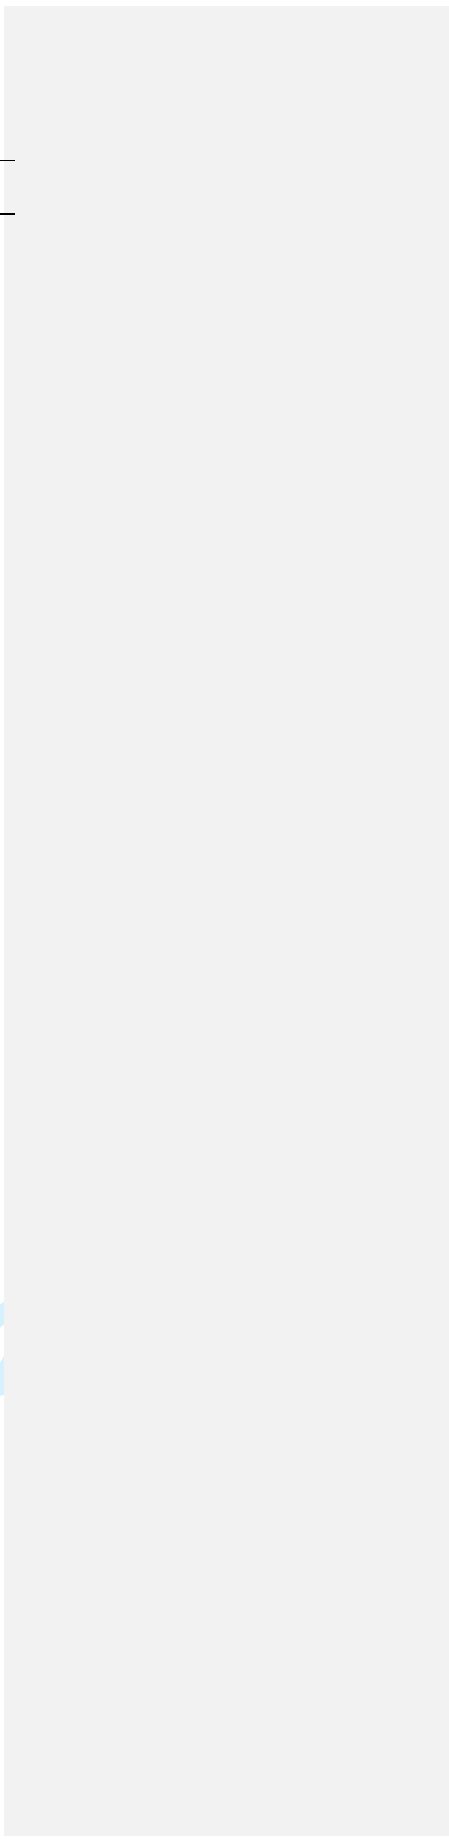

**Table 1.** Sociodemographics, Exposure to PTIEs, Psychological Distress, and Headache Type, by Frequency of Headache Complaints (n=7620)\*†.

| Characteristics                    | No. of Individuals | Recurrent Headache    |            |            | p-value    |         |
|------------------------------------|--------------------|-----------------------|------------|------------|------------|---------|
|                                    |                    | No Recurrent Headache | Monthly    | Weekly     |            | Daily   |
| <b>Female</b>                      |                    |                       |            |            |            |         |
| Headache, No. (%)                  | 3832               | 2707 (71)             | 653 (17)   | 385 (10)   | 87 (2)     |         |
| TTH                                |                    | 0 (0)                 | 461 (71)   | 249 (65)   | 39 (45)    |         |
| Migraine, without TTH              |                    | 0 (0)                 | 137 (21)   | 78 (20)    | 19 (22)    |         |
| Migraine, with TTH                 |                    | 0 (0)                 | 24 (4)     | 43 (11)    | 22 (25)    |         |
| Migraine, with visual aura         | 134                | 0 (0)                 | 64 (10)    | 54 (14)    | 16 (18)    |         |
| Other headaches                    |                    | 0 (0)                 | 31 (5)     | 15 (4)     | 7 (8)      | <0.001‡ |
| Age, mean (SD), y                  | 3832               | 15.8 (1.7)            | 15.9 (1.7) | 16.1 (1.8) | 16.0 (1.7) | 0.02¶   |
| Family Structure, No. (%)          | 3798               |                       |            |            |            |         |
| Living w/ both parents             |                    | 1819 (68)             | 396 (61)   | 216 (57)   | 42 (48)    |         |
| Other                              |                    | 865 (32)              | 250 (39)   | 165 (43)   | 45 (52)    | <0.001‡ |
| Family Economy, No. (%)            | 3630               |                       |            |            |            |         |
| Above average                      |                    | 413 (16)              | 77 (13)    | 57 (16)    | 8 (10)     |         |
| Average                            |                    | 1946 (76)             | 456 (75)   | 252 (69)   | 62 (73)    |         |
| Below average                      |                    | 215 (8)               | 74 (12)    | 55 (15)    | 15 (18)    | <0.001‡ |
| Sum of PTIE†, No. (%)              | 3662               |                       |            |            |            |         |
| 0                                  |                    | 2031 (78)             | 423 (68)   | 226 (61)   | 47 (56)    |         |
| 1                                  |                    | 382 (15)              | 119 (19)   | 69 (19)    | 22 (26)    |         |
| 2                                  |                    | 108 (4)               | 50 (8)     | 39 (11)    | 5 (6)      |         |
| ≥3                                 |                    | 68 (3)                | 28 (5)     | 35 (9)     | 10 (12)    | <0.001‡ |
| Psychological Distress‡, mean (SD) | 3740               | 1.6 (0.5)             | 1.8 (0.6)  | 2.0 (0.7)  | 2.0 (0.7)  | <0.001¶ |
| <b>Male</b>                        |                    |                       |            |            |            |         |

|                                    |      |            |            |            |            |        |
|------------------------------------|------|------------|------------|------------|------------|--------|
| Headache, No. (%)                  | 3788 | 3204 (85)  | 418 (11)   | 145 (4)    | 21 (1)     |        |
| TTH                                |      | 0 (0)      | 324 (78)   | 98 (68)    | 13 (62)    |        |
| Migraine, without TTH              |      | 0 (0)      | 70 (17)    | 25 (17)    | 2 (10)     |        |
| Migraine, with TTH                 |      | 0 (0)      | 9 (2)      | 12 (8)     | 4 (19)     |        |
| Migraine, with visual aura         | 72   | 0 (0)      | 47 (11)    | 23 (16)    | 2 (10)     |        |
| Other headaches                    |      | 0 (0)      | 15 (4)     | 10 (7)     | 2 (9)      | <0.001 |
| Age, mean (SD), y                  | 3788 | 15.8 (1.7) | 15.7 (1.7) | 15.7 (1.6) | 15.8 (2.1) | 0.60   |
| Family Structure, No. (%)          | 3748 |            |            |            |            |        |
| Living w/ both parents             |      | 2206 (70)  | 273 (66)   | 85 (60)    | 12 (60)    |        |
| Other                              |      | 968 (30)   | 139 (34)   | 57 (40)    | 8 (40)     | 0.05   |
| Family Economy, No. (%)            | 3465 |            |            |            |            |        |
| Above average                      |      | 614 (21)   | 82 (22)    | 26 (20)    | 0 (0)      |        |
| Average                            |      | 2107 (72)  | 262 (69)   | 89 (67)    | 12 (63)    |        |
| Below average                      |      | 211 (7)    | 38 (10)    | 17 (13)    | 7 (37)     | <0.001 |
| Sum of PTIEs† No. (%)              | 3527 |            |            |            |            |        |
| 0                                  |      | 2023 (68)  | 244 (64)   | 70 (53)    | 9 (50)     |        |
| 1                                  |      | 622 (21)   | 67 (17)    | 31 (24)    | 4 (22)     |        |
| 2                                  |      | 255 (9)    | 49 (13)    | 18 (14)    | 3 (17)     |        |
| ≥3                                 |      | 95 (3)     | 23 (6)     | 12 (9)     | 2 (11)     | <0.001 |
| Psychological Distress‡, mean (SD) | 3617 | 1.3 (0.4)  | 1.5 (0.5)  | 1.5 (0.6)  | 1.9 (0.7)  | <0.001 |

Abbreviations: PTIE, Potentially Traumatic Interpersonal Event; TTH, Tension-type headache.

\* Recurrent headache is defined as headache ≥ monthly.

† Because of rounding percentages may not total 100.

‡ Exposure to PTIEs is measured as the sum of 5 binary exposure variables.

§ Range of possible score is 1 to 4.

|| Pearson Chi-square test.

¶ ANOVA, analysis of variance.

1  
2  
3  
4  
5  
6  
7 Generally, twice as many girls as boys reported recurrent headache. Amongst girls 20%  
8 reported TTH and 8% reported migraine (with or without TTH), whilst 11% of boys reported  
9 TTH and 3% reported migraine. Prevalence increased with age in girls, but not in boys. ~~and~~  
10 girls reported increasing complaints with increasing age. The prevalence rate of recurrent  
11 monthly headache was 22%, including 16% who reported tension-type headache (TTH), and  
12 6% who reported migraines (4.5% reported only migraine and another 1.5% reported  
13 migraine with TTH). About two thirds of adolescents with only TTH or migraine reported  
14 monthly recurrence, whilst those with combined migraine and TTH headache mostly  
15 reported weekly or daily complaints. Despite sex differences in headache prevalence, the  
16 socio-demographic distribution of recurrent headache followed similar patterns for both  
17 sexes, linking living in 'other' family structures and having a family economy 'below average'  
18 with recurrent headaches.

19  
20  
21  
22  
23  
24  
25  
26  
27  
28  
29  
30  
31 In the present study 26% of girls and 33% of boys reported exposure to one or more  
32 types of potentially traumatic events PTIEs, whilst 4% of both sexes reported exposure to 3  
33 or more victimizations. ~~A~~Amongst adolescents reporting ~~no~~ without recurrent headache  
34 complaints reported the lowest exposure to PTIEs, with 73% reporting ~~ing~~ no  
35 victimization ~~exposure~~, whilst 18% reporting ~~ing~~ exposure to one ~~PTIE~~, and 9% reporting ~~ing~~  
36 exposure to two or more PTIEs. ~~The reported level of exposure to PTIEs seemed to increase~~  
37 across frequencies of headache complaints for both sexes, with the ~~Whereas the~~ highest  
38 degree of victimization ~~PTIE exposure was~~ observed amongst adolescents with ~~chronic~~ daily  
39 headaches, of whom only 55% reported no exposure, 25% reported exposure to 1 ~~PTIE~~ and  
40 20% reported exposure to two or more PTIEs. Mean score for psychological distress was 1.49  
41 ( $\pm 0.55$ ) (SCL-5), and increasing distress was significantly associated with recurrent headache  
42 complaints, as assessed in univariate analysis.

1  
2  
3  
4  
5  
6  
7  
8  
9  
10  
11  
12  
13  
14  
15  
16  
17  
18  
19  
20  
21  
22  
23  
24  
25  
26  
27  
28  
29  
30  
31  
32  
33  
34  
35  
36  
37  
38  
39  
40  
41  
42  
43  
44  
45  
46  
47  
48  
49  
50  
51  
52  
53  
54  
55  
56  
57  
58  
59  
60

A multiple logistic regression analysis, adjusted for sociodemographic factors, revealed a steady trend of increasing odds for recurrent headache with increasing exposure to PTIEs (Table 2, Model 1). The strength of associations between exposure to PTIEs and recurrent headache consistently and significantly decreased after psychological distress was entered into the regression equation (Table 2, Model 2), as assessed in analysis of ratio of odds ratio with bootstrap 95% percentile CIs. Moreover, the magnitude of attenuation in ORs seemed to increase with increasing exposure to PTIEs.

**Table 2.** Recurrent Headache in Relation to Exposure to PTIEs and Psychological Distress, by Sex.\*†‡

|                               |             | <b>Recurrent Headache (n=1514)</b> |                           |                           |                           |
|-------------------------------|-------------|------------------------------------|---------------------------|---------------------------|---------------------------|
|                               |             | <b>Female (n=1021)</b>             |                           | <b>Male (n=496)</b>       |                           |
|                               |             | <b>Model 1</b>                     | <b>Model 2</b>            | <b>Model 1</b>            | <b>Model 2</b>            |
| <b>Variables</b>              | <b>n</b>    | <b>OR<sub>1</sub>(CI)</b>          | <b>OR<sub>2</sub>(CI)</b> | <b>OR<sub>1</sub>(CI)</b> | <b>OR<sub>2</sub>(CI)</b> |
| <b>Sum of PTIEs</b>           |             |                                    |                           |                           |                           |
| <u>0</u>                      | <u>4789</u> | <u>1 [Reference]</u>               | <u>1 [Reference]</u>      | <u>1 [Reference]</u>      | <u>1 [Reference]</u>      |
| <u>1</u>                      | <u>1250</u> | <u>1.46 (1.20-1.78)</u>            | <u>1.25 (1.02-1.53)</u>   | <u>1.04 (0.81-1.34)</u>   | <u>0.93 (0.72-1.20)</u>   |
| <u>2</u>                      | <u>496</u>  | <u>2.28 (1.69-3.08)</u>            | <u>1.73 (1.27-2.36)</u>   | <u>1.71 (1.25-2.33)</u>   | <u>1.41 (1.03-1.94)</u>   |
| <u>≥3</u>                     | <u>252</u>  | <u>2.61 (1.82-3.75)</u>            | <u>1.69 (1.15-2.47)</u>   | <u>2.29 (1.49-3.52)</u>   | <u>1.57 (1.00-2.47)</u>   |
| <u>Overall p-value</u>        |             | <u>&lt;0.001</u>                   | <u>&lt;0.001</u>          | <u>&lt;0.001</u>          | <u>0.029</u>              |
| <u>Psychological Distress</u> | <u>6787</u> |                                    | <u>1.94 (1.70-2.22)</u>   |                           | <u>2.10 (1.72-2.58)</u>   |

Abbreviations: CI, 95% Confidence Interval; OR<sub>1</sub> and OR<sub>2</sub>, Odds Ratio for Regression Model 1 and Model 2, respectively; PTIE, Potentially Traumatic Interpersonal Event.

\* Study definitions and measures are explained in footnotes to Table 1.

† Analyses are restricted to adolescents no missing values for all included variables (3494 females and 3293 males).

1  
2  
3  
4  
5  
6  
7 † Both regression models are adjusted for age, family structure and family economy. Model 2 is additionally  
8 adjusted for psychological distress.  
9  
10  
11  
12  
13  
14  
15  
16  
17  
18  
19  
20  
21  
22  
23  
24  
25  
26  
27  
28  
29  
30  
31  
32  
33  
34  
35  
36  
37  
38  
39  
40  
41  
42  
43  
44  
45  
46  
47  
48  
49  
50  
51  
52  
53  
54  
55  
56 |  
57  
58  
59  
60



1  
2  
3  
4  
5  
6  
7  
8  
9  
10  
11  
12  
13  
14  
15  
16  
17  
18  
19  
20  
21  
22  
23  
24  
25  
26  
27  
28  
29  
30  
31  
32  
33  
34  
35  
36  
37  
38  
39  
40  
41  
42  
43  
44  
45  
46  
47  
48  
49

**Table 2.** Recurrent Headache in Relation to Exposure to PTIEs, Sociodemography and Psychological Distress, by Sex\*†‡.

| Variables                  | No.  | Recurrent Headache, (n=1514)    |                                 |                                                    |                                 |                                 |                                                    |
|----------------------------|------|---------------------------------|---------------------------------|----------------------------------------------------|---------------------------------|---------------------------------|----------------------------------------------------|
|                            |      | Female (n=1021)                 |                                 |                                                    | Male (n=496)                    |                                 |                                                    |
|                            |      | Model 1<br>OR <sub>1</sub> (CI) | Model 2<br>OR <sub>2</sub> (CI) | Model 2/1<br>OR <sub>2</sub> /OR <sub>1</sub> (CI) | Model 1<br>OR <sub>1</sub> (CI) | Model 2<br>OR <sub>2</sub> (CI) | Model 2/1<br>OR <sub>2</sub> /OR <sub>1</sub> (CI) |
| <b>Sum of PTIEs</b>        |      |                                 |                                 |                                                    |                                 |                                 |                                                    |
| 0                          | 4789 | 1 [Reference]                   | 1 [Reference]                   |                                                    | 1 [Reference]                   | 1 [Reference]                   |                                                    |
| 1                          | 1250 | 1.46 (1.20-1.78)                | 1.25 (1.02-1.53)                | 0.86 (0.82-0.90)                                   | 1.04 (0.81-1.34)                | 0.93 (0.72-1.20)                | 0.89 (0.85-0.93)                                   |
| 2                          | 496  | 2.28 (1.69-3.08)                | 1.73 (1.27-2.36)                | 0.76 (0.69-0.82)                                   | 1.71 (1.25-2.33)                | 1.41 (1.03-1.94)                | 0.83 (0.76-0.88)                                   |
| ≥3                         | 252  | 2.61 (1.82-3.75)                | 1.69 (1.15-2.47)                | 0.65 (0.57-0.73)                                   | 2.29 (1.49-3.52)                | 1.57 (1.00-2.47)                | 0.69 (0.59-0.78)                                   |
| Overall p-value            |      | <0.001                          | <0.001                          |                                                    | <0.001                          | 0.029                           |                                                    |
| Age                        | 6787 | 1.05 (1.00-1.09)                | 1.02 (0.98-1.07)                |                                                    | 0.95 (0.89-1.00)                | 0.93 (0.87-0.98)                |                                                    |
| <b>Family Structure</b>    |      |                                 |                                 |                                                    |                                 |                                 |                                                    |
| Living w/mother and father | 4572 | 1 [Reference]                   | 1 [Reference]                   |                                                    | 1 [Reference]                   | 1 [Reference]                   |                                                    |
| Other                      | 2215 | 1.27 (1.09-1.49)                | 1.22 (1.04-1.43)                |                                                    | 1.29 (1.05-1.58)                | 1.26 (1.03-1.55)                |                                                    |
| <b>Family Economy</b>      |      |                                 |                                 |                                                    |                                 |                                 |                                                    |
| Above average              | 1214 | 1 [Reference]                   | 1 [Reference]                   |                                                    | 1 [Reference]                   | 1 [Reference]                   |                                                    |
| Average                    | 4966 | 1.16 (0.94-1.44)                | 1.23 (0.99-1.53)                |                                                    | 0.93 (0.73-1.18)                | 0.95 (0.75-1.21)                |                                                    |
| Below Average              | 607  | 1.61 (1.19-2.17)                | 1.41 (1.04-1.92)                |                                                    | 1.36 (0.94-1.97)                | 1.10 (0.75-1.60)                |                                                    |
| Psychological Distress     | 6787 |                                 | 1.94 (1.70-2.22)                |                                                    |                                 | 2.10 (1.72-2.58)                |                                                    |

Abbreviations: CI, 95% Confidence Interval; OR<sub>1</sub>, Odds Ratio for Regression Model 1; OR<sub>2</sub>, Odds Ratio for Regression Model 2; PTIE, Potentially Traumatic Interpersonal Event.

\* Study definitions and measures are explained in footnotes to Table 1.

† Analyses were restricted to adolescents without missing values, (3494 females and 3293 males).

‡ All regression models are adjusted for age, family structure and family economy. Model 2 is additionally adjusted for psychological distress. Mediation by psychological distress is tested through analysis of ratio of odds ratio (Model 2/Model 1 = OR<sub>1</sub>/OR<sub>2</sub>) with bootstrap 95% percentile confidence intervals presented, 10 000 replications.

1  
2  
3  
4  
5  
6  
7 The direct effect of exposure to PTIEs decreased after the hypothesized mediator,  
8 psychological distress, was entered into the regression equation (Table 2, Model 2).  
9  
10 Bootstrap confidence intervals for the magnitude of this attenuation in OR when entering  
11 psychological distress in the regression equation  $(1 - (OR_2 / OR_1))$  (Model 2/1), indicated a  
12 significant reduction in ORs. Moreover, the magnitude of attenuation in OR increased with  
13 increasing exposure.  
14  
15  
16  
17  
18  
19

20 Similarly, when investigating the associations between trauma-exposure to PTIEs and  
21 headache by 'monthly', 'weekly', and 'daily' recurrence, respectively, were all significant  
22 and cumulative association was found (Model 1, Table 3). Further, for all frequencies of  
23 recurrent headache as outcomes, we found observed a significant and cumulative  
24 attenuation in ORs, when introducing with inclusion of psychological distress as a potential  
25 mediator in the logistic regression analyses (Model 2). We found a stronger  
26 relationship between exposure to PTIEs and were significantly stronger between PTIEs and  
27 weekly, or more frequent, headache, compared to, as monthly headache, compared to  
28 monthly complaints, although This differences in strength of associations leveled out  
29 when entering adjusting for psychological distress, as the potential mediator, in the logistic  
30 regression analysis (supplementary table A13, online only).  
31  
32  
33  
34  
35  
36  
37  
38  
39  
40  
41  
42  
43  
44  
45  
46  
47  
48  
49  
50  
51  
52  
53  
54  
55  
56  
57  
58  
59  
60

1  
2  
3  
4  
5  
6  
7  
8  
9  
10  
11  
12  
13  
14  
15  
16  
17  
18  
19  
20  
21  
22  
23  
24  
25  
26  
27  
28  
29  
30  
31  
32  
33  
34  
35  
36  
37  
38  
39  
40  
41  
42  
43  
44  
45  
46  
47  
48  
49

**Table 3.** Recurrent Headache in Relation to Exposure to PTIEs, by Frequency of Recurrent Headache Complaints\*†‡.

| Variables              | No.  | Recurrent Headache,<br>(n=1514) |                                 |                                                    |                                 |                                 |                                                    |                                 |                                 |                                                    |
|------------------------|------|---------------------------------|---------------------------------|----------------------------------------------------|---------------------------------|---------------------------------|----------------------------------------------------|---------------------------------|---------------------------------|----------------------------------------------------|
|                        |      | Monthly Headache,<br>(n=942)    |                                 |                                                    | Weekly Headache,<br>(n=472)     |                                 |                                                    | Daily Headache,<br>(n=100)      |                                 |                                                    |
|                        |      | Model 1<br>OR <sub>1</sub> (CI) | Model 2<br>OR <sub>2</sub> (CI) | Model 2/1<br>OR <sub>2</sub> /OR <sub>1</sub> (CI) | Model 1<br>OR <sub>1</sub> (CI) | Model 2<br>OR <sub>2</sub> (CI) | Model 2/1<br>OR <sub>2</sub> /OR <sub>1</sub> (CI) | Model 1<br>OR <sub>1</sub> (CI) | Model 2<br>OR <sub>2</sub> (CI) | Model 2/1<br>OR <sub>2</sub> /OR <sub>1</sub> (CI) |
| <b>Sum of PTIEs</b>    |      |                                 |                                 |                                                    |                                 |                                 |                                                    |                                 |                                 |                                                    |
| 0                      | 4789 | 1 [Reference]                   | 1 [Reference]                   |                                                    | 1 [Reference]                   | 1 [Reference]                   |                                                    | 1 [Reference]                   | 1 [Reference]                   |                                                    |
| 1                      | 1250 | 1.17<br>(0.97-1.41)             | 1.05<br>(0.87-1.27)             | 0.90<br>(0.87-0.93)                                | 1.40<br>(1.08-1.81)             | 1.18<br>(0.91-1.53)             | 0.85<br>(0.80-0.89)                                | 2.03<br>(1.23-3.36)             | 1.58<br>(0.95-2.64)             | 0.78<br>(0.70-0.86)                                |
| 2                      | 496  | 1.77<br>(1.37-2.28)             | 1.46<br>(1.12-1.90)             | 0.83<br>(0.78-0.87)                                | 2.46<br>(1.77-3.41)             | 1.78<br>(1.26-2.50)             | 0.72<br>(0.65-0.79)                                | 1.93<br>(0.89-4.20)             | 1.17<br>(0.52-2.63)             | 0.61<br>(0.48-0.73)                                |
| ≥3                     | 252  | 1.74<br>(1.22-2.48)             | 1.30<br>(0.90-1.87)             | 0.74<br>(0.67-0.81)                                | 3.80<br>(2.61-5.54)             | 2.18<br>(1.45-3.27)             | 0.57<br>(0.49-0.66)                                | 4.53<br>(2.26-9.07)             | 2.03<br>(0.95-4.34)             | 0.45<br>(0.32-0.60)                                |
| Overall p-value        |      | <0.001                          | 0.028                           |                                                    | <0.001                          | <0.001                          |                                                    | <0.001                          | 0.164                           |                                                    |
| Sex§                   | 6787 | 1.89<br>(1.64-2.19)             | 1.60<br>(1.38-1.87)             |                                                    | 3.51<br>(2.82-4.37)             | 2.62<br>(2.09-3.30)             |                                                    | 5.14<br>(3.06-8.64)             | 3.56<br>(2.09-6.07)             |                                                    |
| Psychological Distress | 6787 |                                 | 1.71<br>(1.50-1.95)             |                                                    |                                 | 2.24<br>(1.90-2.63)             |                                                    |                                 | 2.78<br>(2.03-3.80)             |                                                    |

Abbreviations: CI, 95% Confidence Interval; OR1, Odds Ratio for Regression Model 1; OR2, Odds Ratio for Regression Model 2; PTIE, Potentially Traumatic Interpersonal Event.  
 \* Study definitions and measures are defined in footnotes to Table 1.  
 † Analyses were restricted to adolescents without missing values, (n=6787).  
 ‡ All models are adjusted for sex, age, family structure and family economy. Model 2 is additionally adjusted for psychological distress. Mediation by psychological distress is tested through analysis of ratio of odds ratio (Model2/Model1 = OR2 /OR1) with bootstrap 95% percentile confidence intervals presented, 10 000 replications.  
 § Male is reference category.

Formatted: English (U.S.)

**Table 3.** Recurrent Headache by Frequency, in Relation to Exposure to PTIEs, Sex and Psychological Distress. \*†‡

| Variables              | n    | Recurrent Headache (n=1514) |                      |                      |                      |                      |                      |
|------------------------|------|-----------------------------|----------------------|----------------------|----------------------|----------------------|----------------------|
|                        |      | Monthly (n=942)             |                      | Weekly (n=472)       |                      | Daily (n=100)        |                      |
|                        |      | Model 1                     | Model 2              | Model 1              | Model 2              | Model 1              | Model 2              |
|                        |      | OR <sub>1</sub> (CI)        | OR <sub>2</sub> (CI) | OR <sub>1</sub> (CI) | OR <sub>2</sub> (CI) | OR <sub>1</sub> (CI) | OR <sub>2</sub> (CI) |
| <u>Sum of PTIEs</u>    |      |                             |                      |                      |                      |                      |                      |
| 0                      | 4789 | 1 [Reference]               | 1 [Reference]        | 1 [Reference]        | 1 [Reference]        | 1 [Reference]        | 1 [Reference]        |
| 1                      | 1250 | 1.17 (0.97-1.41)            | 1.05 (0.87-1.27)     | 1.40 (1.08-1.81)     | 1.18 (0.91-1.53)     | 2.03 (1.23-3.36)     | 1.58 (0.95-2.64)     |
| 2                      | 496  | 1.77 (1.37-2.28)            | 1.46 (1.12-1.90)     | 2.46 (1.77-3.41)     | 1.78 (1.26-2.50)     | 1.93 (0.89-4.20)     | 1.17 (0.52-2.63)     |
| ≥3                     | 252  | 1.74 (1.22-2.48)            | 1.30 (0.90-1.87)     | 3.80 (2.61-5.54)     | 2.18 (1.45-3.27)     | 4.53 (2.26-9.07)     | 2.03 (0.95-4.34)     |
| Overall p-value        |      | <0.001                      | 0.028                | <0.001               | <0.001               | <0.001               | 0.164                |
| Sex§                   | 6787 | 1.89 (1.64-2.19)            | 1.60 (1.38-1.87)     | 3.51 (2.82-4.37)     | 2.62 (2.09-3.30)     | 5.14 (3.06-8.64)     | 3.56 (2.09-6.07)     |
| Psychological Distress | 6787 |                             | 1.71 (1.50-1.95)     |                      | 2.24 (1.90-2.63)     |                      | 2.78 (2.03-3.80)     |

Abbreviations: CI, 95% Confidence Interval; OR<sub>1</sub> and OR<sub>2</sub>, Odds Ratio for Regression Model 1 and Model 2, respectively; PTIE, Potentially Traumatic Interpersonal Event.

\* Study definitions and measures are defined in footnotes to Table 1.

† Analyses are restricted to adolescents without missing values, (n=6787).

‡ Both models are adjusted for sex, age, family structure and family economy. Model 2 is additionally adjusted for psychological distress.

§ Male is reference category

1  
2  
3  
4  
5  
6  
7  
8  
9  
10  
11  
12  
13  
14  
15  
16  
17  
18  
19  
20  
21  
22  
23  
24  
25  
26  
27  
28  
29  
30  
31  
32  
33  
34  
35  
36  
37  
38  
39  
40  
41  
42  
43  
44  
45  
46  
47  
48  
49

The association between exposure to PTIEs and subtypes of recurrent headache followed a similar consistently significant and cumulative pattern for all assessed subtypes of recurrent headache; including tension-type headache (TTH), simple-migraine without TTH, migraine with tension type headache TTH, and 'other' non-classifiable headache\_s were all significantly and cumulatively associated with exposure to PTIEs (Model 1, Table 4). Adding psychological distress as a mediator in regression Model 2, for all four subtypes of recurrent headache yielded a significant reduction in ORs  $OR(1 - OR_2 / OR_1)$  for all analyses. The association between PTIEs and recurrent headache was significantly stronger amongst adolescents reporting any migraine (with or without TTH), in comparison to adolescents reporting TTH only (supplementary table A2, online only). This observed difference between subtypes, seemed to be mainly driven by a stronger association between exposure to PTIEs and migraine with TTH, as opposed to TTH only. We found no significant difference in associations between victimization and the two groups of migraine; migraine with or without TTH.

1  
2  
3  
4  
5  
6  
7 ~~a significant reduction in OR ( $1 - OR_2 / OR_1$ ) for all analyses.~~

8 The association between traumatic events and recurrent headache was significantly stronger  
9  
10 amongst those reporting any migraine in comparison to tension-type headache only  
11  
12 (supplementary table A4, online only). This observed difference between groups was mainly  
13  
14 driven by a stronger association between exposure to trauma and combined migraine with  
15  
16 TTH, as opposed to TTH only. We found no significant differences in associations to  
17  
18 victimization between the two groups of migraine only versus combined migraine and TTH  
19  
20 headaches.  
21  
22  
23  
24  
25  
26  
27  
28  
29  
30  
31  
32  
33  
34  
35  
36  
37  
38  
39  
40  
41  
42  
43  
44  
45  
46  
47  
48  
49  
50  
51  
52  
53  
54  
55  
56  
57  
58  
59  
60

**Table 4.** Recurrent Headache in Relation to Exposure to PTIEs, by Type of Headache Complaints\*†‡.

|                        |      | Recurrent Headache,<br>(n=1514) |                                 |                                                    |                                 |                                 |                                                    |
|------------------------|------|---------------------------------|---------------------------------|----------------------------------------------------|---------------------------------|---------------------------------|----------------------------------------------------|
|                        |      | TTH, only<br>(n=1048)           |                                 |                                                    | Migraine, only<br>(n=293)       |                                 |                                                    |
| Variables              | No.  | Model 1<br>OR <sub>1</sub> (CI) | Model 2<br>OR <sub>2</sub> (CI) | Model 2/1<br>OR <sub>2</sub> /OR <sub>1</sub> (CI) | Model 1<br>OR <sub>1</sub> (CI) | Model 2<br>OR <sub>2</sub> (CI) | Model 2/1<br>OR <sub>2</sub> /OR <sub>1</sub> (CI) |
| <b>Sum of PTIEs</b>    |      |                                 |                                 |                                                    |                                 |                                 |                                                    |
| 0                      | 4789 | 1 [Reference]                   | 1 [Reference]                   |                                                    | 1 [Reference]                   | 1 [Reference]                   |                                                    |
| 1                      | 1250 | 1.16<br>(0.97-1.39)             | 1.01<br>(0.84-1.22)             | 0.87<br>(0.84-0.90)                                | 1.59<br>(1.17-2.17)             | 1.40<br>(1.02-1.92)             | 0.88<br>(0.83-0.92)                                |
| 2                      | 496  | 1.71<br>(1.34-2.20)             | 1.35<br>(1.04-1.75)             | 0.79<br>(0.74-0.84)                                | 2.26<br>(1.48-3.44)             | 1.76<br>(1.14-2.72)             | 0.78<br>(0.69-0.86)                                |
| ≥3                     | 252  | 2.12<br>(1.54-2.92)             | 1.42<br>(1.02-1.99)             | 0.67<br>(0.60-0.74)                                | 3.39<br>(2.10-5.48)             | 2.19<br>(1.31-3.66)             | 0.65<br>(0.54-0.76)                                |
| Overall p-value        |      | <0.001                          | 0.034                           |                                                    | <0.001                          | 0.003                           |                                                    |
| Sex§                   | 6787 | 2.10<br>(1.83-2.42)             | 1.71<br>(1.47-1.97)             |                                                    | 3.08<br>(2.36-4.02)             | 2.49<br>(1.88-3.28)             |                                                    |
| Psychological distress | 6787 |                                 | 1.95<br>(1.72-2.21)             |                                                    |                                 | 1.83<br>(1.49-2.25)             |                                                    |
|                        |      | Migraine w/ TTH,<br>(n=104)     |                                 |                                                    | Other Headache,<br>(n=69)       |                                 |                                                    |
| Variables              | No.  | Model 1<br>OR <sub>1</sub> (CI) | Model 2<br>OR <sub>2</sub> (CI) | Model 2/1<br>OR <sub>2</sub> /OR <sub>1</sub> (CI) | Model 1<br>OR <sub>1</sub> (CI) | Model 2<br>OR <sub>2</sub> (CI) | Model 2/1<br>OR <sub>2</sub> /OR <sub>1</sub> (CI) |
| <b>Sum of PTIEs</b>    |      |                                 |                                 |                                                    |                                 |                                 |                                                    |
| 0                      | 4789 | 1 [Reference]                   | 1 [Reference]                   |                                                    | 1 [Reference]                   | 1 [Reference]                   |                                                    |
| 1                      | 1250 | 1.64<br>(0.98-2.76)             | 1.38<br>(0.82-2.33)             | 0.84<br>(0.77-0.91)                                | 1.62<br>(0.88-2.97)             | 1.40<br>(0.76-2.58)             | 0.86<br>(0.77-0.96)                                |
| 2                      | 496  | 3.72<br>(2.04-6.76)             | 2.46<br>(1.32-4.60)             | 0.66<br>(0.54-0.79)                                | 3.26<br>(1.60-6.63)             | 2.45<br>(1.17-5.11)             | 0.75<br>(0.59-0.92)                                |
| ≥3                     | 252  | 6.08<br>(3.16-11.70)            | 3.36<br>(1.66-6.77)             | 0.55<br>(0.42-0.70)                                | 1.69<br>(0.50-5.68)             | 1.08<br>(0.31-3.78)             | 0.64<br>(0.39-0.89)                                |
| Overall p-value        |      | <0.001                          | 0.002                           |                                                    | 0.011                           | 0.113                           |                                                    |
| Sex§                   | 6787 | 4.73<br>(2.91-7.68)             | 3.38<br>(2.05-5.57)             |                                                    | 2.94<br>(1.73-5.00)             | 2.31<br>(1.33-4.01)             |                                                    |
| Psychological distress | 6787 |                                 | 2.41<br>(1.77-3.27)             |                                                    |                                 | 1.95<br>(1.31-2.88)             |                                                    |

Abbreviations: CI, 95% Confidence Interval; OR<sub>1</sub>, Odds Ratio for Regression Model 1; OR<sub>2</sub>, Odds Ratio for Regression Model 2; PTIE, Potentially Traumatic Interpersonal Event; TTH, Tension-type Headache.

\* Study definitions and measures are defined in footnotes to Table 1.

† Analyses were restricted to adolescents without missing values, (n=6787).

‡ Model 1 is adjusted for sex, age, family structure and family economy. Model 2 is adjusted for psychological distress, sex, age, family structure and family economy. Mediation by psychological distress is evaluated through analysis of ratio of odds ratio (Model 2/Model 1 = OR<sub>1</sub>/OR<sub>2</sub>) with bootstrap 95% percentile confidence intervals presented, 10 000 replications.

§ Male is reference category

**Table 4. Recurrent Headache by Type, in Relation to Exposure to PTIEs, Sex and Psychological Distress.\*†‡**

| Variables              | n    | Recurrent Headache (n=1445) |                  |                              |                  |                           |                  |
|------------------------|------|-----------------------------|------------------|------------------------------|------------------|---------------------------|------------------|
|                        |      | TTH (n=1048)                |                  | Migraine without TTH (n=293) |                  | Migraine with TTH (n=104) |                  |
|                        |      | Model 1                     | Model 2          | Model 1                      | Model 2          | Model 1                   | Model 2          |
|                        |      | OR (CI)                     | OR (CI)          | OR (CI)                      | OR (CI)          | OR (CI)                   | OR (CI)          |
| Sum of PTIEs           |      |                             |                  |                              |                  |                           |                  |
| 0                      | 4789 | 1 [Reference]               | 1 [Reference]    | 1 [Reference]                | 1 [Reference]    | 1 [Reference]             | 1 [Reference]    |
| 1                      | 1250 | 1.16 (0.97-1.39)            | 1.01 (0.84-1.22) | 1.59 (1.17-2.17)             | 1.40 (1.02-1.92) | 1.64 (0.98-2.76)          | 1.38 (0.82-2.33) |
| 2                      | 496  | 1.71 (1.34-2.20)            | 1.35 (1.04-1.75) | 2.26 (1.17-2.17)             | 1.76 (1.14-2.72) | 3.72 (2.04-6.76)          | 2.46 (1.32-4.60) |
| ≥3                     | 252  | 2.12 (1.54-2.92)            | 1.42 (1.02-1.99) | 3.39 (2.10-5.48)             | 2.19 (1.31-3.66) | 6.08 (3.16-11.70)         | 3.36 (1.66-6.77) |
| Overall p-value        |      | <0.001                      | 0.034            | <0.001                       | 0.003            | <0.001                    | 0.002            |
| Sex§                   | 6787 | 2.10 (1.83-2.42)            | 1.71 (1.47-1.97) | 3.08 (2.36-4.02)             | 2.49 (1.88-3.28) | 4.73 (2.91-7.68)          | 3.38 (2.05-5.57) |
| Psychological distress | 6787 |                             | 1.95 (1.72-2.21) |                              | 1.83 (1.49-2.25) |                           | 2.41 (1.77-3.27) |

Abbreviations: CI, 95% Confidence Interval; OR, Odds Ratio; PTIE, Potentially Traumatic Interpersonal Event; TTH, Tension-type Headache.

\* Study definitions and measures are defined in footnotes to Table 1.

† Analyses were restricted to adolescents without missing values, (n=6787). Data for analysis of non-classifiable recurrent headache (n=69) is not presented.

‡ Model 1 is adjusted for sex, age, family structure and family economy. Model 2 is adjusted for psychological distress, sex, age, family structure and family economy.



1  
2  
3  
4  
5  
6  
7  
8  
9  
10  
11  
12  
13  
14  
15  
16  
17  
18  
19  
20  
21  
22  
23  
24  
25  
26  
27  
28  
29  
30  
31  
32  
33  
34  
35  
36  
37  
38  
39  
40  
41  
42  
43  
44  
45  
46  
47  
48  
49

§ Male is reference category

Furthermore, in subgroup analysis, investigating the role impact of posttraumatic stress reactions on as a potential additional mediator of the relationship between victimization exposure to PTIEs and recurrent headache, posttraumatic stress reactions independently and significantly attenuated ORs. Nonetheless, the The contribution of posttraumatic stress reactions became additional contribution of posttraumatic stress, when insignificant when we additionally also accounted for adjusted for general psychological distress, was insignificant (Table 5).

For Peer review only

**Table 5.** Recurrent Headache in Relation to Exposure to PTIEs, adjusted for Psychological Distress and Posttraumatic Stress Reactions\*††.

| Variables                             | No.  | Recurrent Headache,<br>(n=487)  |                                  |                                                           |                                  |                                                           |                                  |                                                           |
|---------------------------------------|------|---------------------------------|----------------------------------|-----------------------------------------------------------|----------------------------------|-----------------------------------------------------------|----------------------------------|-----------------------------------------------------------|
|                                       |      | Model-1<br>OR <sub>1</sub> (CI) | Model-2a<br>OR <sub>2</sub> (CI) | Model-2a/Model-1<br>OR <sub>2</sub> /OR <sub>1</sub> (CI) | Model-2b<br>OR <sub>2</sub> (CI) | Model-2b/Model-1<br>OR <sub>2</sub> /OR <sub>1</sub> (CI) | Model-2c<br>OR <sub>2</sub> (CI) | Model-2c/Model-1<br>OR <sub>2</sub> /OR <sub>1</sub> (CI) |
| <b>Sum of PTIEs</b>                   |      |                                 |                                  |                                                           |                                  |                                                           |                                  |                                                           |
| 1                                     | 1055 | 1 [Reference]                   | 1 [Reference]                    |                                                           | 1 [Reference]                    |                                                           | 1 [Reference]                    |                                                           |
| 2                                     | 459  | 1.59(1.23-2.05)                 | 1.46(1.13-1.89)                  | 0.92(0.87-0.96)                                           | 1.52(1.18-1.97)                  | 0.96(0.92-0.99)                                           | 1.44(1.11-1.87)                  | 0.91(0.85-0.96)                                           |
| ≥3                                    | 226  | 2.15(1.57-2.94)                 | 1.69(1.21-2.35)                  | 0.79(0.71-0.86)                                           | 1.91(1.39-2.64)                  | 0.89(0.82-0.96)                                           | 1.63(1.17-2.27)                  | 0.76(0.67-0.84)                                           |
| Overall p-value                       |      | <0.001                          | 0.001                            |                                                           | <0.001                           |                                                           | 0.002                            |                                                           |
| Sex§                                  | 1740 | 3.01(2.40-3.77)                 | 2.44(1.93-3.10)                  |                                                           | 2.60(2.06-3.30)                  |                                                           | 2.29(1.80-2.92)                  |                                                           |
| Psychological distress                |      |                                 | 1.68(1.40-2.01)                  |                                                           |                                  |                                                           | 1.57(1.30-1.91)                  |                                                           |
| <b>Posttraumatic Stress Reactions</b> |      |                                 |                                  |                                                           |                                  |                                                           |                                  |                                                           |
| 0                                     | 792  |                                 |                                  |                                                           | 1 [Reference]                    |                                                           | 1 [Reference]                    |                                                           |
| 1                                     | 417  |                                 |                                  |                                                           | 1.13(0.84-1.51)                  |                                                           | 1.08(0.81-1.45)                  |                                                           |
| 2                                     | 298  |                                 |                                  |                                                           | 1.64(1.20-2.24)                  |                                                           | 1.45(1.05-1.99)                  |                                                           |

1  
2  
3  
4  
5  
6  
7  
8  
9  
10  
11  
12  
13  
14  
15  
16  
17  
18  
19  
20  
21  
22  
23  
24  
25  
26  
27  
28  
29  
30  
31  
32  
33  
34  
35  
36  
37  
38  
39  
40  
41  
42  
43  
44  
45  
46  
47  
48  
49

|                 |     |                 |                 |
|-----------------|-----|-----------------|-----------------|
| 3               | 233 | 1.78(1.26-2.50) | 1.36(0.95-1.96) |
| Overall p-value |     | 0.001           | 0.100           |

Abbreviations: CI, 95% Confidence Interval; OR1, Odds Ratio for Regression Model 1; OR2, Odds Ratio for Regression Model 2; PTIE, Potentially Traumatic Interpersonal Event.

\* Study definitions and measures are defined in footnotes to Table 1.

‡ Analyses were restricted to adolescents exposed to ≥1 PTIE, without missing values for any of the included variables, n=1740 (946 males and 794 females).

† All models are adjusted for sex, age, family structure and family economy. Model 2a is additionally adjusted for psychological distress, Model 2b for posttraumatic stress reactions and Model 2c for both psychological distress and posttraumatic stress reactions. Mediation by psychological distress and/or posttraumatic stress reactions is evaluated through analysis of ratios of odds ratios (Model 2a-c/Model 1) with bootstrap 95% percentile confidence intervals presented, 10 000 replications.

§ Male is reference category

## DISCUSSION

To our knowledge this is the first population-based study to comprehensively assess associations between exposure to multiple ~~victimization-potentially traumatic interpersonal events (PTIEs)~~ and recurrent headache, meeting the ICHD-II criteria. ~~The main findings were firstly, documentation-The study documents~~ of a strong and consistent relationship between exposure to ~~potentially traumatic interpersonal events (PTIEs)~~ and recurrent headaches experienced by adolescents. ~~The association was observed for both monthly, weekly and daily headache, although significantly stronger for weekly or more frequent complaints. regardless of frequency of complaints. Secondly, A~~ similar, robust pattern was found ~~between exposure to PTIEs and ICHD-II defined tension-type headache (TTH), migraine without TTH, migraine with TTH, and non-classifiable headache. across all major subtypes of complaints. Thirdly, Increasing exposure to PTIEs was associated with a cumulative increase higher in strengths of associations was observed for prevalence of all assessed~~ frequencies and ~~main-subtypes of recurrent headache~~ with increasing victimization, indicating a dose-response relationship. ~~Last, the Furthermore, observed dependency between trauma exposure, general psychological distress and all recurrent headaches possibly reflect the role of psychological distress as a mediator on the pathway linking exposure to PTIEs and recurrent headache complaints. This adjustment for psychological distress lead to a consistent and significant decrease in strength of associations between exposure to PTIEs and all frequencies and subtypes of recurrent headache. mediating role of psychological distress on the relationship between trauma exposure and recurrent headache consistently amplified with sum of exposure to PTIEs for all frequencies and main subtypes of headache complaints. Posttraumatic stress reactions seemed seem~~ to play a similar ~~mediating role in subgroup analysis~~, although adjustment for general distress ~~leveled levelled~~ out ~~it's~~ its

1  
2  
3  
4  
5  
6  
7 specific effect. This may indicate that general psychological distress, as measured within this

8 ~~study,study; encompass posttraumatic stress reactions, as found in a recent study of~~  
9 ~~comorbidity in adolescents.[46]to some degree encompassed posttraumatic stress~~  
10 ~~reactions.[42]~~

Field Code Changed

11  
12  
13  
14  
15  
16  
17 The strengths of this study were the large sample size, the overall high participation rate, the  
18 use of a validated headache interview based upon the International Classification of  
19 Headache Disorder (II) criteria,[40] and the opportunity to assess the impact of several types  
20  
21  
22 of ~~victimization-PTIEs~~ and confounding factors, within a population based cohort of  
23  
24 adolescents.

Field Code Changed

25  
26  
27 ~~Importantly, the retrospective, cross-sectional study-design did not allow for causal~~  
28 ~~inference, or differentiation between confounding and mediational effects. Findings should~~  
29 ~~thus be interpreted within the given constraints of the study. Although our findings indicate~~  
30 ~~that exposure to trauma may be a causal factor in the chronification of headache disorders,~~  
31 ~~our retrospective, cross-sectional study design did not allow for causal inference, and~~  
32 ~~findings should thus be interpreted within the given constraints of the study.~~

33  
34  
35  
36  
37  
38  
39 The lower participation\_ and response\_-rate among adolescents ~~who were out of~~not enrolled  
40 ~~in~~ school, and among those in senior high school compared with junior high school,  
41 represent a possible selection bias. ~~We also found that~~Additionally, young adolescents, boys,  
42 and adolescents not living with both parents were less likely to respond to the PTIE items.  
43  
44 ~~This missing-pattern may represent another source of -selection bias. The most prominent~~  
45 ~~observed selection-bias within this study is the high non-response amongst adolescents not~~  
46 ~~enrolled in school, which may have\_ regarding victimization. These possible selection biases~~  
47 ~~may have~~led to an underestimation of the associations.[47]-Our measures of PTIEs lack

Field Code Changed

1  
2  
3  
4  
5  
6  
7 event-specific information on relationship to perpetrator, severity, frequency, duration and  
8 recency of exposure,[48] and commonly occurring PTIEs, such as emotional abuse, peer  
9 relational victimization and cyber-bullying were not addressed.[49 50] [48]The above  
10 mentioned uncertainties, related to the measurement of PTIEs, may have affected the  
11 observed strengths of associations. Furthermore, analysis on an additional outcome-  
12 measure of headache-related functional impairment would, most probably, have  
13 strengthened associations.[24] [51][31 58][56 57][30 35][51]A validated, comprehensive  
14 measure of trauma exposure would have strengthened the study, as would [30] a validated  
15 measure of headache related functional impairment.[24] [23] Despite these, accounted for,  
16 potential selection-biases and measurement uncertainties, it is likely that the main findings  
17 can be generalized to other adolescent populations.  
18  
19  
20  
21  
22  
23  
24  
25  
26  
27  
28  
29  
30

Field Code Changed  
Field Code Changed  
Field Code Changed

31 Prevalence rates of recurrent headache, including frequencies and subtypes of complaints,  
32 were in large unchanged in comparison with national headache ~~prevalence~~prevalence rates  
33 from 1995-1997,[51] and with in the lower range of aggregated international estimates.[6]  
34 Further, the observed patterns of distribution of recurrent headache in this study, in relation  
35 to sex, age, [6] sociodemography[2 16 20] and psychological distress[2 4 10 19] complied  
36 with previous epidemiological documentation. ~~As previously documented prevalence rates~~  
37 were doubled in girls as compared to boys, rose steadily with age throughout adolescence in  
38 females, whilst flattening out in males,[6] and were higher in adolescents reporting  
39 psychological distress,[2 4 10 19] living without both parents,[20] or within family economies  
40 below average.[2 16] Although overall comparison of traumatization Likewise, the observed  
41 prevalence of exposure to PTIEs in our study was within the lower range, and distribution  
42 followed similar patterns, to that observed in comparable studies, although comparison  
43  
44  
45  
46  
47  
48  
49  
50  
51  
52  
53  
54  
55

Field Code Changed  
Field Code Changed  
Field Code Changed  
Field Code Changed  
Field Code Changed

1  
2  
3  
4  
5  
6  
7  
8  
9  
10  
11  
12  
13  
14  
15  
16  
17  
18  
19  
20  
21  
22  
23  
24  
25  
26  
27  
28  
29  
30  
31  
32  
33  
34  
35  
36  
37  
38  
39  
40  
41  
42  
43  
44  
45  
46  
47  
48  
49  
50  
51  
52  
53  
54  
55  
56  
57  
58  
59  
60

1  
2  
3  
4  
5  
6  
7  
8  
9  
10  
11  
12  
13  
14  
15  
16  
17  
18  
19  
20  
21  
22  
23  
24  
25  
26  
27  
28  
29  
30  
31  
32  
33  
34  
35  
36  
37  
38  
39  
40  
41  
42  
43  
44  
45  
46  
47  
48  
49  
50  
51  
52  
53  
54  
55  
56  
57  
58  
59  
60

across measures and populations is difficult. ~~the observed prevalence rates and patterns of distribution of exposure in our study complied with that reported elsewhere, although in the lower range.~~ [28 33] Regarding levels of psychological distress screening estimates were in correspondence with ~~previous-prior~~ national and international findings. [42 46]

- Field Code Changed
- Field Code Changed
- Field Code Changed
- Field Code Changed

Our main findings ~~substantiate~~ ~~of a strong, consistent and cumulative relationship between exposure to interpersonal trauma and recurrent headache in a general adolescent population, complies with~~ recent but scarce evidence provided by cross-sectional population-based studies of adolescents, ~~of a significant association between exposure to PTIEs and headache, of which two~~ Two of these studies used the ICHD-II criteria. [14 21 23 25]

Further, results are in coherence with one population-based, [52] two clinical, [27 53] and another two convenience-sample [26 54] retrospective, cross-sectional studies of adults, of which one used the ICHD-II criteria. [27] Apart from one adolescent study which examined girls only, [14] and the adult convenience sample study, [26] the sample-sizes in these studies were smaller, ~~in comparison to~~ than in the present study. Generally, the adolescent studies assessed exposure to one type of ~~trauma-exposure~~ PTIEs only, whilst the adult studies looked specifically at child abuse and family dysfunction.

- Field Code Changed

~~In regard to the question of~~ Concerning temporality of associations, a large cohort study using follow-up data over 12 years of adolescent and adult Canadians recently found childhood adversity and depression to be significant predictors of adult migraine. [38]

- Field Code Changed

Additionally, observational, prospective, convenience sample studies of adolescents exposed to bullying lend evidence to the more general relationship between victimization and psychosomatic complaints, although headache measurements in these studies were too

imprecise to draw more specific conclusions of associations.[49 55 56] Taken together,

~~scarce some~~ evidence suggests that ~~victimization-PTIEs~~ may be ~~an~~ important factor~~s~~ on the causal pathway leading to onset and chronification of ~~headache-disorder~~headache disorder.

Amongst the observed relationships~~z~~ between ~~trauma~~ exposure ~~to~~ PTIEs and main subtypes of headache~~z~~, migraine was most strongly linked to ~~victimization~~exposure. This ~~discrepancy between tension type headache and migraine~~The observed stronger association between PTIEs and migraine, as opposed to TTH~~seemed, seemed~~ to be explained ~~largely~~largely by the stronger association between ~~trauma~~ exposure ~~to~~ PTIEs and combined ~~headache~~ (migraine with ~~tension type complaints~~TTH). ~~The~~This se findings may ~~reflect a pattern where~~indicate that exposure to ~~interpersonal trauma~~PTIEs predispose for more severe ~~headache complaints~~, and ~~comorbidity in the form of multiple types of~~complex head pains,[57] reflecting a similar pattern as that observed in the relationship between ~~trauma~~

~~PTIE-exposure and comorbidity of psychiatric disorders, psychopathology~~.[29] Such an interpretation complies with previous findings that both migraines in ~~general~~general and combined migraines ~~and tension type headaches~~ specifically, tend to be clinically more severe and disabling~~z~~, ~~in comparison~~compared to ~~other primary headache disorders~~TTH ~~only~~.[18 19] On the other hand~~z~~, the observed discrepancies in strength of associations

~~between PTIEs and subtypes of headaches~~ may be an artefact of underlying chronification of complaints, as ~~combined~~ migraine ~~and with tension type headache~~TTH was more often experienced weekly or daily~~z~~, as opposed to migraine or TTH only~~z~~, which mostly recurred monthly.

~~In~~Our findings suggest that this study we found psychological distress ~~to may be play an important role as a confounder, or a mediator. one plausible mediator via which traumatic experiences may increase the risk of chronification of headache complaints in adolescents. A~~

Field Code Changed



1  
2  
3  
4  
5  
6  
7  
8  
9  
10  
11  
12  
13  
14  
15  
16  
17  
18  
19  
20  
21  
22  
23  
24  
25  
26  
27  
28  
29  
30  
31  
32  
33  
34  
35  
36  
37  
38  
39  
40  
41  
42  
43  
44  
45  
46  
47  
48  
49  
50  
51  
52  
53  
54  
55  
56  
57  
58  
59  
60

mediating role would~~This finding~~ complies with current pathophysiological understanding, where violence as an environmental stressor, may acutely or over time overwhelm, exhaust and further dysregulate the stress response system.[58] Pathological effects, such as recurrent headache, though initially induced by external trauma, may largely be related to persistence of physiological distress, functioning as an internal stressor that triggers cerebral sensitization and hypersensitivity through alterations of shared neuroendoimmunological pathways of emotion and pain, which in turn may lead to hyperalgesia and chronification of headache disorders.[3 9 17 59] Future interdisciplinary studies need to explore these suggested pathways-mechanisms to delineate etiological pathways, and further enable tailored interventions.

Sex differences in the strength of associations between PTIEs and recurrent headache may be related to the gender-biased qualitative differences of reported PTIEs, such as girls being more prone to sexual abuse and exposure within their social networks.[37] Such exposure is associated with worse health outcomes, which are possibly related to the developmental stage at the time of abuse, proximity to the perpetrator, and the persistence and severity of the abuse.[31 60] Other possible mechanisms may be related to developmental biological differences, or sociocultural gender role expectations affecting reaction patterns,[61] predisposing girls to internalizing as opposed to externalizing behaviour, which in turn increase their susceptibility of experiencing persistent chronic pain.[62]

**Conclusion and implications**

Our main findings comply with essential features of current theoretical models of developmental psychopathology,[63] recurrent pain-[62] and chronic pediatricpaediatric

Field Code Changed

Field Code Changed  
 Field Code Changed  
 Field Code Changed  
 Field Code Changed

Field Code Changed

Field Code Changed  
 Field Code Changed  
 Field Code Changed

Field Code Changed

Field Code Changed

Field Code Changed  
 Field Code Changed

1  
2  
3  
4  
5  
6  
7 | headache-[3, 17, 64] that underscore the need for a biopsychosocial approach to understand  
8 | adverse health outcomes in childhood.[64] Knowing that recurrent headaches are amongst  
9 | the most common causes of disability in adults and adolescents alike,[1, 18] substantiated  
10 | empirical evidence of a strong, consistent and cumulative relationship between exposure to  
11 | ~~trauma~~PTIEs, psychological distress and recurrent headache, regardless of subtype, demands  
12 | for further investigation.-[23] We are currently at a stage where we recognize that childhood  
13 | ~~traumavictimization-abuse~~ and adversities do little good for psychological and somatic  
14 | health and development, and yet we lack valid, distinct and precise knowledge to guide  
15 | public health interventions and clinical practice. Thus, primarily there is a need for more  
16 | comprehensive, interdisciplinary research, preferably prospective, using valid measurements  
17 | of risk factors and clinically applicable outcome-measures, aiming to identify underlying  
18 | gene-environment ~~interactions-interplay~~, or biopsychosocial causal pathways, as targets of  
19 | tailored prevention and intervention. Secondly, from a more general public health  
20 | perspective, the observed dependency between ~~trauma~~-exposure to PTIEs and highly  
21 | prevalent psychological and somatic conditions challenges the traditional dichotomization of  
22 | health services, requiring establishment and maintenance of low-threshold, local health  
23 | services directed toward adolescents that integrate and accommodate psychological and  
24 | somatic needs.[64-67]

Field Code Changed

## CONTRIBUTORSHIP

Contributors: SØS carried out the data processing, ~~analysed~~analyzed the data, drafted and revised the paper. She is the guarantor. GD and JAZ contributed to the ~~intergration~~integration of the headache interview, measures of victimization and posttraumatic distress in the Young-HUNT3 Study. GD and ST wrote the original study protocol, applied for and received the grant for the study, and further participated in the epidemiological ~~modelling~~modeling, analysis and writing of the manuscript. TWL contributed to the statistical analysis. JAZ participated in the design of the study and helped to write the manuscript. All authors have read and approved the final version of the manuscript.

## ACKNOWLEDGEMENTS

We would like to thank the adolescents participating in the HUNT Study and the HUNT research centre for their collaboration. Further we would like to thank Professor Dean ~~G.Kilpatrick~~Kilpatrick for his useful comments on the manuscript.

## COMPETING INTERESTS/DISCLOSURE

None declared. Synne Øien-Stensland, Grete Dyb, Siri Thoresen, Tore Wentzel-Larsen and John-Anker Zwart report no competing interests. All authors have completed the BMJ declaration of competing interests and the Unified Competing Interest form (available on request from the corresponding author) and declare that S. Stensland has support from The Norwegian Council for Mental Health, The Norwegian ~~ExtraFoundation~~Extra Foundation for Health and Rehabilitation for the submitted work; (2) none have relationships with companies that might have an interest in the submitted work in the previous 5 years; (3) their spouses, partners, or children have no financial relationships that may be relevant to the submitted work; and (4) the authors have no non-financial interests that may be relevant to the submitted work.

## ACCESS AND INTEGRITY OF ALL AUTHORS

1  
2  
3  
4  
5  
6  
7 All authors had full access to all of the data (including statistical reports and tables) in the study and  
8 can take full responsibility for the integrity of the data and the accuracy of the data analysis.  
9

#### 10 11 **FUNDING**

12 This work was supported by the Norwegian Centre for Violence and Traumatic Stress Studies and  
13 with a grant from The Norwegian Council for Mental Health, The Norwegian ExtraFoundation for  
14 Health and Rehabilitation, grant number 2009/2/0023. The Nord-Trøndelag Health Study (The HUNT  
15 Study), which is a collaboration between HUNT Research Centre (Faculty of Medicine, Norwegian  
16 University of Science and Technology NTNU), Nord-Trøndelag County Council, ~~Central~~  
17 ~~Norway~~ Central Norway Health Authority, and the Norwegian Institute of Public Health planned,  
18 organized and financed the data collection.  
19

#### 20 21 **ETHICS APPROVAL**

22 Inclusion was based upon written consent from participants aged 16 years and older and from  
23 parents for those under 16, in accordance with Norwegian law. This study was approved by the  
24 Norwegian Regional Committee for Medical and Health Research Ethics.  
25

#### 26 27 **DATA SHARING STATEMENT**

28 Data are available from the HUNT study <http://www.huntbiosciences.com/Cohorts/Diabetes/The->  
29 [HUNT-Bio-And-Databank](http://www.huntbiosciences.com/Cohorts/Diabetes/The-HUNT-Bio-And-Databank). The general health questionnaire and headache interview used in the  
30 study are accessible from the HUNT bio-and databank (<http://www.ntnu.edu/hunt/data/que>). There  
31 is no additional data available.  
32

#### 33 34 **THE ORIGINAL STUDY PROTOCOL**

35 The original study protocol is accessible from the corresponding author, and may be translated from  
36 Norwegian to English on ~~request~~ request.  
37

1  
2  
3  
4  
5  
6  
7  
8  
9  
10  
11  
12  
13  
14  
15  
16  
17  
18  
19  
20  
21  
22  
23  
24  
25  
26  
27  
28  
29  
30  
31  
32  
33  
34  
35  
36  
37  
38  
39  
40  
41  
42  
43  
44  
45  
46  
47  
48  
49  
50  
51  
52  
53  
54  
55  
56  
57  
58  
59  
60

For peer review only



## REFERENCES

1. Roth-Isigkeit A, Thyen U, Stöven H, et al. Pain Among Children and Adolescents: Restrictions in Daily Living and Triggering Factors. *Pediatrics* 2005;115(2)
2. King S, Chambers CT, Huguet A, et al. The epidemiology of chronic pain in children and adolescents revisited: A systematic review. *Pain* 2011;152(12):2729-38
3. Seshia SS, Wang SJ, Abu-Arafeh I, et al. Chronic daily headache in children and adolescents: a multi-faceted syndrome. *Can. J. Neurol. Sci.* 2010;37(6):769-78
4. Dunn KM, Jordan KP, Mancl L, et al. Trajectories of pain in adolescents: a prospective cohort study. *Pain* 2011;152(1):66-73
5. Brna P, Dooley J, Gordon K, et al. The prognosis of childhood headache: a 20-year follow-up. *Arch. Pediatr. Adolesc. Med.* 2005;159(12):1157-60
6. Jensen R, Stovner LJ. Epidemiology and comorbidity of headache. *Lancet Neurol* 2008;7(4):354-61
7. Dyb G, Holmen TL, Zwart JA. Analgesic overuse among adolescents with headache: the Head-HUNT-Youth Study. *Neurology* 2006;66(2):198-201
8. Olesen J. The international classification of headache disorders, 2nd edition (ICHD-II). *Rev. Neurol. (Paris)*. 2005;161(6-7):689-91
9. Kelman L. The biological basis of headache. [Review]. *Expert review of neurotherapeutics* 2011;11 (3):363-78
10. Strine TW, Okoro CA, McGuire LC, et al. The associations among childhood headaches, emotional and behavioral difficulties, and health care use. *Pediatrics* 2006;117(5):1728-35
11. Lateef TM, Merikangas KR, He J, et al. Headache in a national sample of American children: prevalence and comorbidity. *J. Child Neurol.* 2009;24(5):536-43
12. Seifert TD, Evans RW. Posttraumatic headache: a review. *Curr Pain Headache Rep* 2010;14(4):292-8
13. Robberstad L, Dyb G, Hagen K, et al. An unfavorable lifestyle and recurrent headaches among adolescents: the HUNT study. *Neurology* 2010;75(8):712-7
14. Ghandour RM, Overpeck MD, Huang ZJ, et al. Headache, stomachache, backache, and morning fatigue among adolescent girls in the United States: associations with behavioral, sociodemographic, and environmental factors. *Arch. Pediatr. Adolesc. Med.* 2004;158(8):797-803
15. Lewandowski AS, Palermo TM, Stinson J, et al. Systematic Review of Family Functioning in Families of Children and Adolescents With Chronic Pain. *The Journal of Pain* 2010;11(11):1027-38
16. Holstein BE, Currie C, Boyce W, et al. Socio-economic inequality in multiple health complaints among adolescents: international comparative study in 37 countries. *International journal of public health* 2009;54 Suppl 2:260-70
17. Borsook D, Maleki N, Becerra L, et al. Understanding Migraine through the Lens of Maladaptive Stress Responses: A Model Disease of Allostatic Load. *Neuron* 2012;73(2):219-34
18. Merikangas KR, Cui L, Richardson AK, et al. Magnitude, impact, and stability of primary headache subtypes: 30 year prospective Swiss cohort study. *BMJ* 2011;343:d5076
19. Waldie KE, Poulton R. The burden of illness associated with headache disorders among young adults in a representative cohort study. *Headache* 2002;42(7):612-9
20. Bugdayci R, Ozge A, Sasmaz T, et al. Prevalence and factors affecting headache in Turkish schoolchildren. *Pediatr. Int.* 2005;47(3):316-22
21. Juang KD, Wang SJ, Fuh JL, et al. Association between adolescent chronic daily headache and childhood adversity: a community-based study. *Cephalalgia* 2004;24(1):54-9
22. Hensley L, Varela RE. PTSD symptoms and somatic complaints following Hurricane Katrina: the roles of trait anxiety and anxiety sensitivity. *J Clin Child Adolesc Psychol* 2008;37(3):542-52
23. Fuh JL, Wang SJ, Juang KD, et al. Relationship between childhood physical maltreatment and migraine in adolescents. *Headache* 2010;50(5):761-8
24. Zafar M, Kashikar-Zuck SM, Slater SK, et al. Childhood abuse in pediatric patients with chronic daily headache. *Clin. Pediatr. (Phila)*. 2012;51(6):590-3
25. Luntamo T, Sourander A, Rihko M, et al. Psychosocial determinants of headache, abdominal pain, and sleep problems in a community sample of Finnish adolescents. *Eur. Child Adolesc. Psychiatry* 2012;21(6):301-13
26. Anda R, Tietjen G, Schulman E, et al. Adverse childhood experiences and frequent headaches in adults. *Headache* 2010;50(9):1473-81

- 1
- 2
- 3
- 4
- 5
- 6
- 7 27. Tietjen GE, Brandes JL, Peterlin BL, et al. Childhood maltreatment and migraine (part I). Prevalence and  
adult revictimization: a multicenter headache clinic survey. *Headache* 2010;50(1):20-31
- 8 28. Norman RE, Byambaa M, De R, et al. The long-term health consequences of child physical abuse,  
emotional abuse, and neglect: a systematic review and meta-analysis. *PLoS Med*  
9 2012;9(11):e1001349
- 10 29. Ford JD, Elhai JD, Connor DF, et al. Poly-victimization and risk of posttraumatic, depressive, and  
11 substance use disorders and involvement in delinquency in a national sample of adolescents. *J.*  
12 *Adolesc. Health* 2010;46(6):545-52
- 13 30. McLaughlin K, Greif Green J, Gruber MJ, et al. Childhood adversities and first onset of psychiatric  
14 disorders in a national sample of us adolescents. *Arch. Gen. Psychiatry* 2012;69(11):1151-60
- 15 31. Zinzow HM, Ruggiero KJ, Resnick H, et al. Prevalence and mental health correlates of witnessed parental  
16 and community violence in a national sample of adolescents. *Journal of Child Psychology and*  
17 *Psychiatry* 2009;50(4):441-50
- 18 32. Fisher HL, Moffitt TE, Houts RM, et al. Bullying victimisation and risk of self harm in early adolescence:  
19 longitudinal cohort study. *BMJ* 2012;344:e2683
- 20 33. Finkelhor D, Ormrod RK, Turner HA. Lifetime assessment of poly-victimization in a national sample of  
21 children and youth. *Child Abuse Negl.* 2009;33(7):403-11
- 22 34. Jonson-Reid M, Kohl PL, Drake B. Child and adult outcomes of chronic child maltreatment. *Pediatrics*  
23 2012;129(5):839-45
- 24 35. Copeland WE, Keeler G, Angold A, et al. Traumatic events and posttraumatic stress in childhood. *Arch.*  
25 *Gen. Psychiatry* 2007;64(5):577-84
- 26 36. Neuner F, Schauer M, Karunakara U, et al. Psychological trauma and evidence for enhanced vulnerability  
27 for posttraumatic stress disorder through previous trauma among West Nile refugees. *BMC*  
28 *Psychiatry* 2004;4:34
- 29 37. Tolin DF, Foa EB. Sex differences in trauma and posttraumatic stress disorder: a quantitative review of 25  
30 years of research. *Psychol. Bull.* 2006;132(6):959-92
- 31 38. Modgill G, Jette N, Wang JL, et al. A population-based longitudinal community study of major depression  
32 and migraine. *Headache* 2012;52(3):422-32
- 33 39. Holmen TL, Bratberg G, Krokstad S, et al. Cohort profile of the Young-HUNT Study, Norway: A population-  
34 based study of adolescents. *Int. J. Epidemiol.* 2013 doi: 10.1093/ije/dys232[published Online First:  
35 Epub Date]].
- 36 40. Zwart JA, Dyb G, Stovner LJ, et al. The validity of 'recognition-based' headache diagnoses in adolescents.  
37 Data from the Nord-Trøndelag Health Study 1995-97, Head-HUNT-Youth. *Cephalalgia*  
38 2003;23(3):223-9
- 39 41. Tambs K, Moum T. How well can a few questionnaire items indicate anxiety and depression? *Acta*  
40 *Psychiatr. Scand.* 1993;87(5):364-7
- 41 42. Strand BH, Dalgard OS, Tambs K, et al. Measuring the mental health status of the Norwegian population:  
42 a comparison of the instruments SCL-25, SCL-10, SCL-5 and MHI-5 (SF-36). *Nord J Psychiatry*  
43 2003;57(2):113-8
- 44 43. Rodriguez N, Steinberg A, Pynoos RS. UCLAs PTSD-index for DSM IV (revision 1). UCLA Trauma Psychiatry  
45 Service, 1999.
- 46 44. Kenny DA. Mediation. *Secondary Mediation* 2012.
- 47 45. Efron B, Tibshirani RJ. *An Introduction to the Bootstrap*. Monographs on Statistics and Applied Probability  
48 57: Chapman and Hall/CRC, 1994.
- 49 46. Kessler RC, Avenevoli S, McLaughlin KA, et al. Lifetime co-morbidity of DSM-IV disorders in the US  
50 national comorbidity survey replication adolescent supplement (NCS-A). *Psychol. Med.*  
51 2012;42(9):1997-2010
- 52 47. De Ridder KA, Pape K, Johnsen R, et al. School dropout: a major public health challenge: a 10-year  
53 prospective study on medical and non-medical social insurance benefits in young adulthood, the  
54 Young-HUNT 1 Study (Norway). *J. Epidemiol. Community Health* 2012
- 55 48. Scott-Storey K. Cumulative Abuse: Do Things Add Up? An Evaluation of the Conceptualization,  
56 Operationalization, and Methodological Approaches in the Study of the Phenomenon of Cumulative  
57 Abuse. *Trauma, violence & abuse* 2011 doi: 10.1177/1524838011404253[published Online First:  
58 Epub Date]].
- 59 49. Nixon CL, Linkie CA, Coleman PK, et al. Peer relational victimization and somatic complaints during  
60 adolescence. *J. Adolesc. Health* 2011;49(3):294-9

- 1  
2  
3  
4  
5  
6  
7 50. Suzuki K, Asaga R, Sourander A, et al. Cyberbullying and adolescent mental health. *Int J Adolesc Med Health* 2012;24(1):27-35 doi: 10.1515/ijamh.2012.005[published Online First: Epub Date] ].
- 8 51. Zwart JA, Dyb G, Holmen TL, et al. The prevalence of migraine and tension-type headaches among  
9 adolescents in Norway. The Nord-Trøndelag Health Study (Head-HUNT-Youth), a large population-  
10 based epidemiological study. *Cephalalgia* 2004;24(5):373-9
- 11 52. Bonomi AE, Cannon EA, Anderson ML, et al. Association between self-reported health and physical  
12 and/or sexual abuse experienced before age 18. *Child Abuse Negl.* 2008;32(7):693-701
- 13 53. Gerber MR, Fried LE, Pineles SL, et al. Posttraumatic Stress Disorder and Intimate Partner Violence in a  
14 Women's Headache Center. *Women Health* 2012;52(5):454-71
- 15 54. Audi CA, Segall-Corrêa AM, Santiago SM, et al. Adverse health events associated with domestic violence  
16 during pregnancy among Brazilian women. *Midwifery* 2012;28(4):416-21
- 17 55. Rigby K. Peer victimisation at school and the health of secondary school students. *Br. J. Educ. Psychol.*  
18 1999;69 ( Pt 1):95-104
- 19 56. Fekkes M, Pijpers FI, Fredriks AM, et al. Do bullied children get ill, or do ill children get bullied? A  
20 prospective cohort study on the relationship between bullying and health-related symptoms.  
21 *Pediatrics* 2006;117(5):1568-74
- 22 57. Tietjen GE, Brandes JL, Peterlin BL, et al. Childhood maltreatment and migraine (part III). Association with  
23 comorbid pain conditions. *Headache* 2010;50(1):42-51
- 24 58. Danese A, McEwen BS. Adverse childhood experiences, allostasis, allostatic load, and age-related disease.  
25 *Physiol. Behav.* 2012;106(1):29-39
- 26 59. Macdonald G, Leary MR. Why does social exclusion hurt? The relationship between social and physical  
27 pain. *Psychol. Bull.* 2005;131(2):202-23
- 28 60. Costello EJ, Erkanli A, Fairbank JA, et al. The prevalence of potentially traumatic events in childhood and  
29 adolescence. *J. Trauma. Stress* 2002;15(2):99-112
- 30 61. Rutter M, Caspi A, Moffitt TE. Using sex differences in psychopathology to study causal mechanisms:  
31 unifying issues and research strategies. *Journal of Child Psychology and Psychiatry* 2003;44(8):1092-  
32 115
- 33 62. Asmundson GJG, Katz J. Understanding the co-occurrence of anxiety disorders and chronic pain: state-of-  
34 the-art. *Depress. Anxiety* 2009;26(10):888-901
- 35 63. Pynoos RS, Steinberg AM, Piacentini JC. A developmental psychopathology model of childhood traumatic  
36 stress and intersection with anxiety disorders. *Biol. Psychiatry* 1999;46(11):1542-54
- 37 64. Seshia SS, Phillips DF, von Baeyer CL. Childhood chronic daily headache: a biopsychosocial perspective.  
38 *Dev. Med. Child Neurol.* 2008;50(7):541-5 doi: 10.1111/j.1469-8749.2008.03013.x[published Online  
39 First: Epub Date] ].
- 40 65. Shonkoff JP, Boyce WT, S. MB. Neuroscience, molecular biology, and the childhood roots of health  
41 disparities: Building a new framework for health promotion and disease prevention. *JAMA: The  
42 Journal of the American Medical Association* 2009;301(21):2252-59
- 43 66. Russ S, Garro N, Halfon N. Meeting children's basic health needs: From patchwork to tapestry. *Child  
44 Youth Serv Rev* 2010;32(9):1149-64
- 45 67. Goodman A, Joyce R, Smith JP. The long shadow cast by childhood physical and mental problems on adult  
46 life. *Proc. Natl. Acad. Sci. U. S. A.* 2011;108(15):6032-7
- 47  
48  
49  
50  
51  
52  
53  
54  
55  
56  
57  
58  
59  
60



**APPENDIX**

For peer review only

1  
2  
3  
4  
5  
6  
7  
8  
9  
10  
11  
12  
13  
14  
15  
16  
17  
18  
19  
20  
21  
22  
23  
24  
25  
26  
27  
28  
29  
30  
31  
32  
33  
34  
35  
36  
37  
38  
39  
40  
41  
42  
43  
44  
45  
46  
47

## SUPPLEMENTARY TABLES.

## Between groups comparison of risk of recurrent headache

**Table A1.** Assessment of Differences in Association Between Varying Frequencies of Recurrent Headache Complaints in Relation to Exposure to PTIEs and Psychological Distress\*†‡.

| Variables    | N   | Recurrent headache,<br>n=1514   |                                 |     |                                 |                                 |     |                                 |                                 |
|--------------|-----|---------------------------------|---------------------------------|-----|---------------------------------|---------------------------------|-----|---------------------------------|---------------------------------|
|              |     | Monthly vs. Weekly              |                                 | N   | Weekly vs. Daily                |                                 | N   | Monthly vs. Daily               |                                 |
|              |     | Model 1<br>OR <sub>1</sub> (CI) | Model 2<br>OR <sub>2</sub> (CI) |     | Model 1<br>OR <sub>1</sub> (CI) | Model 2<br>OR <sub>2</sub> (CI) |     | Model 1<br>OR <sub>1</sub> (CI) | Model 2<br>OR <sub>2</sub> (CI) |
| Sum of PTIEs |     |                                 |                                 |     |                                 |                                 |     |                                 |                                 |
| 0            | 908 | [Reference]                     | [Reference]                     | 334 | [Reference]                     | [Reference]                     | 684 | [Reference]                     | [Reference]                     |
| 1            | 269 | 1.15<br>(0.86-1.54)             | 1.07<br>(0.80-1.44)             | 117 | 1.47<br>(0.86-2.52)             | 1.42<br>(0.83-2.45)             | 202 | 1.62<br>(0.97-2.72)             | 1.39<br>(0.82-2.35)             |
| 2            | 147 | 1.36<br>(0.94-1.98)             | 1.20<br>(0.82-1.76)             | 63  | 0.75<br>(0.33-1.67)             | 0.70<br>(0.31-1.58)             | 100 | 1.08<br>(0.49-2.38)             | 0.84<br>(0.37-1.89)             |
| ≥3           | 90  | 2.20                            | 1.79                            | 58  | 1.30                            | 1.11                            | 56  | 2.61                            | 1.84                            |

1  
2  
3  
4  
5  
6  
7  
8  
9  
10  
11  
12  
13  
14  
15  
16  
17  
18  
19  
20  
21  
22  
23  
24  
25  
26  
27  
28  
29  
30  
31  
32  
33  
34  
35  
36  
37  
38  
39  
40  
41  
42  
43  
44  
45  
46  
47

|                 |      |             |             |             |             |             |             |
|-----------------|------|-------------|-------------|-------------|-------------|-------------|-------------|
|                 |      | (1.40-3.46) | (1.12-2.86) | (0.62-2.72) | (0.51-2.43) | (1.24-5.48) | (0.85-3.98) |
| Overall p-value |      | 0.005       | 0.100       | 0.346       | 0.390       | 0.041       | 0.264       |
| Psychological   | 1414 |             | 1.45        | 572         |             | 1.24        | 1042        |
| Distress        |      |             | (1.19-1.76) |             |             | (0.88-1.74) | (1.40-2.78) |
| p-value         |      |             | <0.001      |             |             | 0.221       | <0.001      |

Abbreviations: CI, 95% Confidence Interval; OR, Odds Ratio, PTIE, Potentially Traumatic Interpersonal Event.

\* Study definitions and measures are defined in footnotes to Table 1.

† Analyses were restricted to adolescents with recurrent headache without missing values, (n=1514 (n<sub>monthly</sub>=942, n<sub>weekly</sub>=472, n<sub>daily</sub>=100)).

‡ All models are adjusted for sex, age, family structure and family economy. Model 2 is additionally adjusted for psychological distress.

**Table A2.** Assessment of Differences in Association Between Varying Subtypes of Primary Recurrent Headache Complaints in Relation to Exposure to PTIEs and Psychological Distress\* †‡.

| Recurrent Primary headache,<br>n=1445 |     |                                 |                                 |                                      |                                 |                                 |     |                                 |                                 |                         |                                 |                                 |
|---------------------------------------|-----|---------------------------------|---------------------------------|--------------------------------------|---------------------------------|---------------------------------|-----|---------------------------------|---------------------------------|-------------------------|---------------------------------|---------------------------------|
|                                       |     | TTH vs.<br>Migraine, only       |                                 | Migraine, only vs. Migraine<br>w/TTH |                                 |                                 |     | TTH vs.<br>Migraine w/TTH       |                                 | TTH vs.<br>Any Migraine |                                 |                                 |
| Variables                             | No. | Model 1<br>OR <sub>1</sub> (CI) | Model 2<br>OR <sub>2</sub> (CI) | No.                                  | Model 1<br>OR <sub>1</sub> (CI) | Model 2<br>OR <sub>2</sub> (CI) | No. | Model 1<br>OR <sub>1</sub> (CI) | Model 2<br>OR <sub>2</sub> (CI) | No.                     | Model 1<br>OR <sub>1</sub> (CI) | Model 2<br>OR <sub>2</sub> (CI) |
| Sum of PTIEs                          |     |                                 |                                 |                                      |                                 |                                 |     |                                 |                                 |                         |                                 |                                 |
| 0                                     | 872 | [Reference]                     | [Reference]                     | 229                                  | [Reference]                     | [Reference]                     | 747 | [Reference]                     | [Reference]                     | 924                     | [Reference]                     | [Reference]                     |
| 1                                     | 256 | 1.32<br>(0.94-1.84)             | 1.31<br>(0.94-1.84)             | 84                                   | 1.08<br>(0.60-1.94)             | 1.04<br>(0.57-1.88)             | 216 | 1.47<br>(0.86-2.50)             | 1.36<br>(0.80-2.33)             | 278                     | 1.34<br>(0.99-1.81)             | 1.31<br>(0.97-1.78)             |
| 2                                     | 128 | 1.35<br>(0.83-2.05)             | 1.30<br>(0.82-2.05)             | 46                                   | 1.68<br>(0.83-3.38)             | 1.50<br>(0.73-3.08)             | 114 | 2.17<br>(1.17-4.01)             | 1.92<br>(1.02-3.59)             | 144                     | 1.49<br>1.01-2.20)              | 1.44<br>(0.97-2.14)             |
| ≥                                     | 85  | 1.64<br>(0.98-2.75)             | 1.63<br>(0.95-2.79)             | 38                                   | 1.71<br>(0.77-3.81)             | 1.38<br>(0.59-3.22)             | 75  | 2.74<br>(1.39-5.39)             | 2.21<br>(1.10-4.47)             | 99                      | 1.89<br>(1.20-2.95)             | 1.77<br>(1.11-2.81)             |
| Overall p-value                       |     | 0.132                           | 0.172                           |                                      | 0.357                           | 0.674                           |     | 0.007                           | 0.064                           |                         | 0.009                           | 0.035                           |

1  
2  
3  
4  
5  
6  
7  
8  
9  
10  
11  
12  
13  
14  
15  
16  
17  
18  
19  
20  
21  
22  
23  
24  
25  
26  
27  
28  
29  
30  
31  
32  
33  
34  
35  
36  
37  
38  
39  
40  
41  
42  
43  
44  
45  
46  
47

---

|               |      |             |     |             |      |             |             |
|---------------|------|-------------|-----|-------------|------|-------------|-------------|
| Psychological | 1341 | 1.01        | 397 | 1.35        | 1152 | 1.46        | 1.11        |
| Distress      |      | (0.81-1.27) |     | (0.93-1.97) |      | (1.05-2.02) | (0.91-1.36) |
| p-value       |      | 0.991       |     | 0.115       |      | 0.023       | 0.313       |

---

Abbreviations: CI, 95% Confidence Interval; OR, Odds Ratio, PTIE, Potentially Traumatic Interpersonal Event.

\* Study definitions and measures are defined in footnotes to Table 1.

† Analyses were restricted to adolescents with recurrent headache without missing values, (n=1514 (n<sub>TTH</sub>=1048, n<sub>migraine, only</sub>=293, n<sub>migraine w/TTH</sub>=104)).

‡ All models are adjusted for sex, age, family structure and family economy. Model 2 is additionally adjusted for psychological distress.

---

1  
2  
3  
4  
5  
6  
7  
8  
9  
10  
11  
12  
13  
14  
15  
16  
17  
18  
19  
20  
21  
22  
23  
24  
25  
26  
27  
28  
29  
30  
31  
32  
33  
34  
35  
36  
37  
38  
39  
40  
41  
42  
43  
44  
45  
46  
47  
48  
49  
50  
51  
52  
53  
54  
55  
56  
57  
58  
59  
60

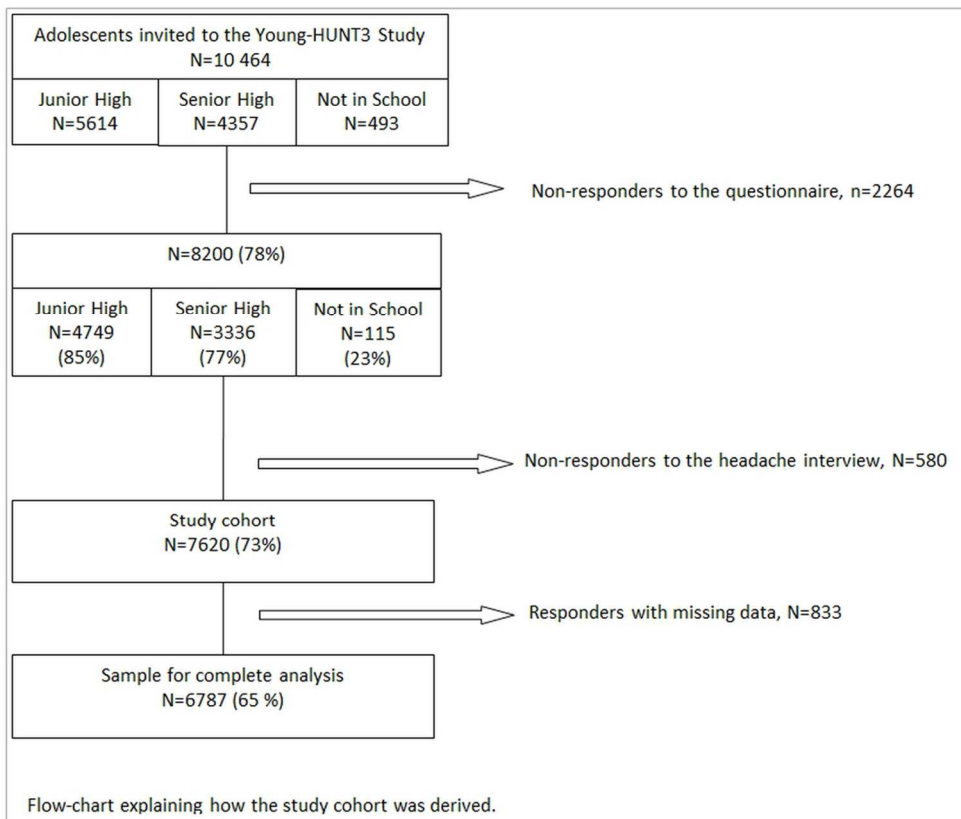

108x90mm (300 x 300 DPI)

For peer review only

# Young HUNT

ADOLESCENT SECTION OF THE HEALTH STUDY IN NORD-TRØNDELAG, HUNT

It's your turn to participate in the Nord-Trøndelag Health Study (**HUNT**)!

**We hope you have read the information brochure about YOUNG HUNT that you took home with**

**you and have decided to participate!**

Read the informed consent form that is inside the questionnaire and check that it is your name

that is on it. Mark it as to whether you will participate or not, sign it and hand it in to the teacher.

**Your name should NOT be on your questionnaire!**

Put an X in the boxes  that you think apply to you. Answer the best you can! If there are

questions that you do not want to answer, skip them.

When you are finished, put the questionnaire in the envelope you have been given, seal it and

give the envelope to the teacher. Do this even if you haven't finished the questionnaire.

**All your answers will be treated in the strictest of confidence!**

No one at school is allowed to see your answers.

If you wish to speak to someone about the study, speak to the Young HUNT nurse when she

visits your school or ring HUNT Research Centre (see back of questionnaire).

## Good Luck and Thank You!

2

**Date of questionnaire completion** \_\_\_\_ / \_\_\_\_ **20**\_\_\_\_

**1. For those who are in Junior High School: What type of plans do you have regarding your studies in High School?**

**in High School?**

High School academic studies  High School vocational studies  Don't know

**2. What type of plans do you have regarding continued studies?**

(Put one or more Xs)

\* College or university \* Other vocational training .....

for 4 years or more .....  \* No plans .....

\* College or university \* Don't know.....

less than 4 years .....

**WHERE YOU LIVE**

**3. What type of housing do you live in? (Only one X)**

\* Single-family house .....  \* Farm w/ animal husbandry.....

\* Row house/2-4 family housing .....  \* Farm w/out animal husbandry .....

\* Flat in block/flat .....  \* Other housing .....

**4. Who do you currently live with? (Put one or more Xs)**

\* Mother .....  \* Foster parents .....

\* Father .....  \* Adoptive parents .....

\* 1-2 siblings .....  \* Grandparents/other.....

\* 3 or more siblings.....  \* Spouse/partner.....

1  
2  
3 \* Mother's new husband or partner  \* Friends.....

4 \* Father's new wife or partner.....  \* Alone/in a rented room.....

5 **5. If your mother and father do not live together, who do you live with?**

6 Mostly my mother  Mostly my father  Equal time at both parents

7 **6. Are there pets living in your home?**

8 No .....  Yes, other animals with fur .....

9 Yes, cat .....  Yes, bird .....

10 Yes, dog .....  Yes, other .....

11 3

12 **YOUR HEALTH**

13 **7. How is your health at the moment? (One X)**

14 \* Poor .....  \* Good.....

15 \* Not so good .....  \* Very good.....

16 **8. Are you disabled in any of these ways? (Put an X for each line)**

17 No A little Somewhat Severely

18 \* Motor impairment (movement)

19 \* Vision impairment

20 \* Hearing impairment

21 \* Impairment due to physical illness

22 \* Impairment due to mental health problems

23 **9. Have you had any of these ailments in the past 12 months: (Put an X for each line)**

24 Not at all A little Much

25 \* Palpitation

26 \* Constipation

27 \* Diarrhoea

28 \* Alternating constipation and diarrhoea

29 \* Bloating

30 \* Nausea

31 **ALLERGIES**

32 **10. Do you have allergies? Yes  No  Don't know**

33 *If Yes, what do you think you are allergic to? (One or more Xs)*

34 \* Grass/trees  \* Dogs  \* Food

35 \* House dust  \* Cats  \* Other

36 \* Horses  \* Don't know

37 **11. Has a doctor given you any allergy tests (blood tests, skin tests)?**

38 Yes  No  Don't know

39 *If Yes, what did you have an allergic reaction to? (One or more Xs)*

40 4

41 \* Nothing  \* Dog  \* Food

42 \* Grass/trees  \* Cat  \* Other

43 \* House dust  \* Horse  \* Don't know

44 **RESPIRATORY TRACT**

45 **12. Have you ever had wheezing or whistling in the chest?**



1  
2  
3 Yes  No

4 IF YOU ANSWERED "NO", SKIP TO QUESTION 15

5 **13. Have you had wheezing or whistling in the chest in the past 12 months?**

6 Yes  No

7 IF YOU ANSWERED "NO", SKIP TO QUESTION 15

8 **14. How many attacks of wheezing have you had in the past 12 months?**

9 None  1 to 3  4 to 12  More than 12

10 \*\*\*\*\*

11 **15. Do you have or have you had asthma?** Yes  No

12 If YES, has a doctor said that you have/have had asthma? Yes  No

13 **16. In the past 12 months has your chest sounded wheezy during or after exercise?**

14 Yes  No

15 **17. In the last 12 months have you had a dry cough at night apart from a cough associated a cold or chest infection?**

16 Yes  No

#### 17 **NASAL PROBLEMS**

18 **18. In the past 12 months, have you had a problem with sneezing or a runny or blocked nose when you did not have a cold or the flu?**

19 Yes  No

20 IF YOU ANSWERED "NO", SKIP TO QUESTION 21

21 **19. Has this nose problem been accompanied by itchy-watery eyes?**

22 Yes  No

23 **20. How much did this nose problem interfere with your daily activities? (One X)**

24 Not at all  A little  A moderate amount  A lot

25 5

26 **21. Have you ever had hay fever or nasal allergies?** Yes  No

#### 27 **RASHES**

28 **22. Have you had an itchy rash during the last 12 months?** Yes  No

29 IF YOU ANSWERED "NO", SKIP TO QUESTION 25

30 **23. Have you had this itchy rash in the following places: the folds of your elbow (inside), back**

31 **of your knees, on the front of your ankles, under your buttocks or around your neck, ears or**

32 **eyes?** Yes  No

33 **24. How often on the average has this itchy rash kept you awake at night? (One X)**

34 Not at all  Less often than 1 night a week  1 night or more a week

35 **25. Have you ever had eczema?** Yes  No

36 If Yes, has a doctor said that you have/ have had "atopic eczema"? Yes  No

#### 37 **ACNE**

38 **26. Have you had problems with acne?** Yes  No

39 IF YOU ANSWERED "NO", SKIP TO QUESTION 31

40 **27. Where was the acne? (Put one or more Xs)**

41 Forehead.....  Cheeks.....  Shoulders.....  Other places.....

42 Nose.....  Chest.....  Back.....

1  
2  
3  
4  
5  
6  
7  
8  
9  
10  
11  
12  
13  
14  
15  
16  
17  
18  
19  
20  
21  
22  
23  
24  
25  
26  
27  
28  
29  
30  
31  
32  
33  
34  
35  
36  
37  
38  
39  
40  
41  
42  
43  
44  
45  
46  
47  
48  
49  
50  
51  
52  
53  
54  
55  
56  
57  
58  
59  
60

28. How much has the acne bothered you? Very much  Much  A little  Not at all

Only one X

29. Have you used non-prescription creams, skin astringents or other similar products to get

rid of the acne? (bought at the drug store or other shop, not prescribed by a doctor)

Yes  No

If Yes, has it helped? One X No  Some  Yes

30. Have you been to a doctor because of acne? Yes  No

If Yes, did the doctor recommend any of the following treatments? (Put an X for each line)

• Topical treatment (ex: creams or liquid solutions) ..... Yes  No

• Antibiotic tablets (tetracycline) ..... Yes  No

• Roaccutan tablets ..... Yes  No

If Yes, did this treatment help? (One X) No  Some  Yes

6

31. How often have you had any of the below listed pain during the last 3 months?

(Without

having injured yourself or having a known illness that is the reason for the pain)

Look at the figure and put an X for each line

IF YOU ANSWERED "NEVER OR SELDOM" FOR EVERYTHING, SKIP TO QUESTION 34

If you have had pain during the last 3 months,

32. Does anything on the below list apply to you? (Put an X for each line):

Yes No

\* Pain makes it difficult to fall asleep.....

\* Pain disturbs my sleep at night. ....

\* Pain makes it difficult to sit in class. ....

\* Pain makes it difficult for me to walk more than one kilometre. ....

\* Because of pain I have problems in gym class. ....

33. All things considered, has pain made it difficult to do daily activities? (Put an X for each line)

No Yes, sometimes Yes, often

\* At school .....

\* In leisure time .....

If you answered Yes, what type of pain makes daily activities difficult? (One or more Xs)

Headache/migraine  Stomach pain  Muscular/skeletal pain  Other pain

Never or seldom

About once a month

About once a week

More than once a week

Almost every

- 1  
2  
3 day  
4 A. Headache/migraine  
5 B. Neck/ shoulder pain  
6 C. Pain in the upper back  
7 D. Pain in the lower  
8 back/buttocks  
9 E. Pain in chest  
10 F. Stomach pain  
11 G. Pain in left arm  
12 H. Pain in right arm  
13 I. Pain in left leg  
14 J. Pain in right leg  
15 Other pain

**PAIN**

7

**OTHER ILLNESSES****34. Has a doctor diagnosed you with:** (Put an X for each line) Yes No

- 21 \* Epilepsy ..... ▽ ▽  
22 \* Diabetes ..... ▽ ▽  
23 \* Migraine ..... ▽ ▽  
24 \* Juvenile arthritis ..... ▽ ▽  
25 \* Other illnesses that have lasted longer than 3 months ..... ▽ ▽

**MEDICINE USE****35. How often in the last 3 months have you taken non-prescription medicine for any of the****below listed complaints?** (medicine not prescribed by a doctor, for example bought at a store or pharmacy) (Put an X for each line)

33 Never 1 day a 2 days a 3 days a 4 days a  
34 week or week week week or  
35 less more

- 36 \* Headache/migraine ▽ ▽ ▽ ▽ ▽  
37 \* Muscle/joint pain ▽ ▽ ▽ ▽ ▽  
38 \* Back pain ▽ ▽ ▽ ▽ ▽  
39 \* Stomach pain ▽ ▽ ▽ ▽ ▽  
40 \* Other ▽ ▽ ▽ ▽ ▽

**36. Do you take any medicine that was prescribed for you by a doctor?** Yes ▽ No ▽**37. Do you take/use any of these medicines or dietary supplements?**

(Put an X for each line)

Never Sometimes Almost daily

- 49 \* Iron tablets ▽ ▽ ▽  
50 \* Laxative tablets ▽ ▽ ▽  
51 \* Vitamins ▽ ▽ ▽  
52 \* Cod-liver oil ▽ ▽ ▽  
53 \* Homeopathic medicine, herbal medicine ▽ ▽ ▽  
54 \* Other ▽ ▽ ▽

**TOBACCO****38. Does anyone you live with smoke at home?** (One or more Xs)

- 59 \* No, nobody ▽ \* Yes, my mother ▽ \* Yes, a sibling ▽  
60

\* Yes, my father  \* Yes, other people

**39. Have you tried smoking?** (at least one cigarette) Yes  No

8

*IF YOU ANSWERED "NO", SKIP TO QUESTION 43*

**40. Do you smoke?** (Put an X in the appropriate box and write in the number of cigarettes. A package of loose tobacco equals approx. 50 cigarettes)

Yes, I smoke about \_\_\_\_\_ cigarettes daily.

Yes, I smoke occasionally, but not daily.

No, not anymore, but previously I smoked occasionally.

No, not anymore, but previously I smoked about \_\_\_\_\_ cigarettes daily.

No, I don't smoke.

*IF YOU ANSWERED "NO, I DON'T SMOKE", SKIP TO QUESTION 44*

**41. If you smoke or have smoked daily:**

\* How old were you when you began smoking daily? \_\_\_\_\_ years old

\* If you quit smoking daily, how old were you when you quit? \_\_\_\_\_ years old

**42. If you smoke or have smoked occasionally:**

\* How old were you when you began smoking occasionally? \_\_\_\_\_ years old

\* How many days have you smoked in the last month? \_\_\_\_\_ number of days

*(Write 0 if you have not smoked in the past month)*

\* About how many cigarettes have you smoked in the last month? \_\_\_\_\_ number of cigarettes

*(Write 0 if you have not smoked in the past month)*

\* If you quit smoking occasionally, how old were you when you quit? \_\_\_\_\_ years old

**43. How many of your friends smoke?** None  A few  Almost all

(One X)

\*\*\*\*\*

**44. Do you use or have you used snuff, chewing tobacco or similar products?** (One X)

No, never  Yes, but have quit  Yes, sometimes  Yes, everyday

*IF YOU ANSWERED "NO, NEVER", SKIP TO QUESTION 50*

9

**45. If you use or have used snuff/chewing tobacco:**

\* How old were you when you began using snuff/chewing tobacco? \_\_\_\_\_ years old

\* If you stopped using snuff/chewing tobacco, how old were you when you stopped?

\_\_\_\_\_ years old

\* How many boxes/bags of snuff/chewing tobacco do you use/have you used a week?

\_\_\_\_\_ number of boxes/bags

*(Write 0 if you use less than one box a month)*

**46. If you smoke cigarettes and use snuff, which did you start first?**

(One X)

Snuff  About the same time (within 3 months)

Cigarettes  Don't remember

**47. Did you start using snuff to try to quit smoking or to smoke less?**

(One X)

No  Yes, to quit smoking  Yes, to smoke less

**48. How many of your friends use snuff/chewing tobacco?** (One X)

None  A few  Almost all

\*\*\*\*\*

**49. Have you ever tried hash, marijuana or other drugs?** (One X) Yes  No

If Yes, How old were you the first time? \_\_\_\_\_ years old

1  
2  
3  
4  
5  
6  
7  
8  
9  
10  
11  
12  
13  
14  
15  
16  
17  
18  
19  
20  
21  
22  
23  
24  
25  
26  
27  
28  
29  
30  
31  
32  
33  
34  
35  
36  
37  
38  
39  
40  
41  
42  
43  
44  
45  
46  
47  
48  
49  
50  
51  
52  
53  
54  
55  
56  
57  
58  
59  
60

50. Do you have friends or acquaintances who use drugs? Yes  No

### SPORTS AND EXERCISE

51. Not during the average school day: How many days a week do you play sports or exercise to

the point where you breathe heavily and/or sweat? (Only one X)

\* Everyday  \* Less often than once a week

\* 4-6 days a week  \* Less often than once a month

\* 2-3 days a week  \* Never

\* 1 day a week

10

52. Not during the average school day: How many hours a week do you play sports or exercise

to the point where you breathe heavily and/or sweat? (Only one X)

None  \* About 2-3 hours

About ½ hour  \* About 4-6 hours

About 1-1½ hours  \* 7 or more hours

53. Think about the past 7 days: How many hours did you spend sitting in an average day?

(This could be the time spent sitting at the computer, doing homework, at friends, reading and TV watching

(include times both sitting and laying down for the last two). Count the times at school and in your leisure

time.) \_\_\_\_\_ Number of hours

54. Do you work out/train at a health club? Yes  No

55. How often have you done/participated in any of the following activities/sports the past 12

months? (Put an X for each line)

Never Less than Once Several x

1 x a week a week a week

\* Endurance sports (ex: running, cross-country skiing, cycling, swimming)

\* Team sports (ex: football, volleyball, handball, ice hockey, squash)

\* Aesthetic sports (ex: dance, gymnastics, aerobics)

\* Strength sports (ex: weightlifting, wrestling, bodybuilding)

\* Martial arts/combat sports (ex: judo, karate, taekwondo, boxing)

\* Technical sports (ex: riding, track sports, alpine skiing, ski jumping, snowboard, skate boarding)

\* Adrenaline sports (ex: white water rafting, mountain climbing, paragliding)

\* Jogging or racewalking/hiking

\* Other

56. If you haven't been involved in any of these activities/sports in the past 12 months, but did so previously, how old were you when you stopped? \_\_\_\_\_ years old

57. Do you participate in sports competitions? (One X)

Yes  No, but I used to compete  No

### ALCOHOL

58. Have you ever tried drinking alcohol? (Meaning alcoholic beer, wine, hard liquor or moonshine)

Yes  No  Don't know

If Yes, **do you sometimes drink alcohol now?** Yes  No

IF YOU ANSWERED NO, SKIP TO QUESTION 66

11

**59. How old were you when you began drinking** (more than a sip)? \_\_\_\_\_ years old

**60. Have you ever drunk so much alcohol that you felt intoxicated (drunk)?**

(One X)

\* No, never .....  \* Yes, 4-10 times .....

\* Yes, once .....  \* Yes, 11-25 times .....

\* Yes, 2-3 times .....  \* Yes, more than 25 times .....

**61. About how much beer, wine or hard liquor do you usually drink during two weeks?**

Don't

count alcohol free beer. Write 0 if you do not drink alcohol.

Beer..... number of 1/2 bottles Hard liquor, liqueurs..... number of glasses (approx. 1/2 dl)

Wine..... number of glasses (approx. 1 dl) Moonshine ..... number of glasses (approx. 1/2 dl)

Alcopop ..... number of bottles

**62. How often do you currently drink alcohol?** (One X)

\* Every week or more often .....

\* Every other week .....

\* More seldom than every other week, but more often than once a month .....

\* Once a month or more seldom than once a month .....

\* Never .....

**63. On which days during the week do you most often drink alcohol?** (One or more Xs)

I do not drink  Fridays/Saturdays  Other days of the week

**64. Have you ever seen either of your parents intoxicated?** (One X)

\* Never .....  \* A few times during the year .....

\* A few times .....  \* A few times a month .....

\* A few times a week .....

12

**MEALS AND EATING HABITS**

**65. How often do you usually eat these meals?** (Put an X for each line)

Every- 4-6 days 1-3 days Seldom

day a week a week or never

\* Breakfast

\* Lunch

\* Dinner (warm)

\* Supper/evening snack

**66. Are you trying to lose weight?** (One X)

No, I'm comfortable with my weight  No, but I need to lose weight  Yes

**67. What do you usually eat at school?** (One X)

Packed lunch  Buy food at the cafeteria  Do not eat lunch at school

**68. Below are listed things that concern your eating habits.** (Put an X for each line)

Never Seldom Often Always

\* When I first begin eating, it is difficult to stop.

\* I vomit after I have eaten.

\* I spend too much time thinking about food.



- 1  
2  
3  
4 \* I feel that food controls my life.
- 5 \* When I eat, I cut my food up in small pieces.
- 6 \* It takes me longer than others to finish a meal.
- 7  
8 \* Other people think I'm too thin.
- 9  
10 \* I feel that others pressure me to eat.

11 **69. How often do you usually drink the following?** (Put an X for each line)

12 Seldom/ 1-6 glasses 1 glass 2-3 glasses 4 glass or  
13 never a week a day a day more a day

- 14 \* Cola/soda/still soft drinks w/ sugar.....
- 15 \* Cola/soda/still soft drinks w/out sugar...
- 16 \* Whole milk/kefir/yoghurt.....
- 17 \* Low fat milk or yoghurt/cultured milk.....
- 18 \* Skim milk (sour/sweet) .....
- 19 \* Fruit juice .....
- 20 \* Water .....

21  
22  
23  
24  
25 13

26 **70. How often do you usually eat the following foods?** (Put an X for each line)

27 Several times Once Every week Less Never  
28 a day a day but not often than  
29 everyday every week

- 30 \* Whole grain bread/crispbread .....
- 31 \* Oily fish (salmon, trout, mackerel).....
- 32 \* Fruit.....
- 33 \* Vegetables .....
- 34 \* White cheese .....
- 35 \* Potato chips and such .....
- 36 \* Candy, chocolate, other sweets.....

37  
38  
39  
40  
41 **71. What type of fat do you usually use on bread?** (One X)

42 Butter/hard margarine  Soft/low fat margarine  Liquid margarine/Oil  Don't use any  
43

44  
45 **72. Do you consider yourself:** (One X)

- 46 \* Very fat .....  \* Thin.....
- 47 \* Chubby .....  \* Very thin.....
- 48  
49 \* About the same as others.....

50  
51 **HOW THINGS ARE GOING FOR YOU**

52 **73. Thinking about your life at the moment, would you say that you by and large are**  
53 **satisfied**

54 **with life, or are you mostly dissatisfied?** (One X)

- 55 \* Very satisfied .....  \* Somewhat dissatisfied .....
- 56 \* Satisfied.....  \* Dissatisfied .....
- 57 \* Somewhat satisfied .....  \* Very dissatisfied .....
- 58  
59 \* Neither satisfied nor dissatisfied

60 **74. Do you feel, for the most part, strong and fit or tired and worn out?** (One X)

- 1
- 2
- 3
- 4 \* Very strong and fit ..... ▽ \* Somewhat tired and worn out.. ▽
- 5 \* Strong and fit ..... ▽ \* Tired and worn out..... ▽
- 6
- 7 \* Somewhat strong and fit ..... ▽ \* Very tired and worn out .... ▽
- 8 \* Somewhere in between ..... ▽

9 **75. Would you say you are usually cheerful or downhearted (sad)?** (One X)

- 10
- 11 \* Very downhearted (sad) ..... ▽ \* Somewhat cheerful ..... ▽
- 12 \* Downhearted (sad) ..... ▽ \* Cheerful ..... ▽
- 13 \* Somewhat downhearted (sad) ..... ▽ \* Very cheerful ..... ▽
- 14
- 15 \* Some of both ..... ▽
- 16

17 14

18 **76. Below is a list of some problems. Have you been bothered by any of these in the**

19 **last 14**

20 **days?** (Put an X for each line)

21 Not A little Quite Very

22 bothered bothered bothered bothered

- 23 \* Been constantly afraid and anxious ..... ▽ ▽ ▽ ▽
- 24
- 25 \* Felt tense or uneasy ..... ▽ ▽ ▽ ▽
- 26
- 27 \* Felt hopelessness when you think of the future ..... ▽ ▽ ▽ ▽
- 28
- 29 \* Felt dejected or sad ..... ▽ ▽ ▽ ▽
- 30
- 31 \* Worried too much about various things ..... ▽ ▽ ▽ ▽

32 **77. How do you see yourself?** Put an X in a box for each sentence below indicating whether you

33 agree or

34 disagree in how it relates to you. (Put an X for each line)

35 Strongly Agree Disagree Strongly

36 Agree disagree

- 36 \* I take a positive attitude toward myself..... ▽ ▽ ▽ ▽
- 37
- 38 \* I certainly feel useless at times..... ▽ ▽ ▽ ▽
- 39
- 40 \* I feel I do not have much to be proud of..... ▽ ▽ ▽ ▽
- 41
- 42 \* I feel that I am a person of worth,
- 43 at least on an equal plane with others..... ▽ ▽ ▽ ▽

44 **78. How often do you experience the reactions that are described below?**

45 (Put an X for each line) Never Seldom Some- Often Always

46 times

- 47 \* I feel anxious and don't know what to do
  - 48 in an embarrassing situation ..... ▽ ▽ ▽ ▽ ▽
  - 49
  - 50 \* I feel anxious when I am with others and have
  - 51 to do something while they watch me do it
  - 52 (ex: be in a play, play music, sports) ..... ▽ ▽ ▽ ▽ ▽
  - 53
  - 54 \* I feel anxious when I have to speak or read
  - 55 aloud in front of a group of people ..... ▽ ▽ ▽ ▽ ▽
  - 56
  - 57 \* Before I go someplace where I'm going to be
  - 58 with people (ex: a party, school, football game)
  - 59 I sweat, my heart beats fast and/or
  - 60 I get a headache or stomach ache ..... ▽ ▽ ▽ ▽ ▽
- \* Before I go to a party or someplace with other people
- I think about what could go wrong (ex: that I make mistakes,
- seem dumb and/or...what if they see how frightened I am!) ..... ▽ ▽ ▽ ▽ ▽



1  
2  
3 \* I feel anxious and don't know what to do  
4 when I'm in a new situation ..... ▽ ▽ ▽ ▽ ▽

5  
6 15

7 **79. How have you thought and felt about yourself and about your family in the past**  
8 **month?**

9 (Put an X for each line)

10 Totally Totally  
11 agree Agree Average Disagree disagree

12 \* I easily make others feel comfortable around me ..... ▽ ▽ ▽ ▽ ▽

13 \* In my family we share views of what is important in life... ▽ ▽ ▽ ▽ ▽

14 \* I easily find new friends ..... ▽ ▽ ▽ ▽ ▽

15 \* I feel comfortable with my family ..... ▽ ▽ ▽ ▽ ▽

16 \* I am good at talking to new people ..... ▽ ▽ ▽ ▽ ▽

17 \* My family view the future as positive,  
18 even when very sad things happen..... ▽ ▽ ▽ ▽ ▽

19 \* I always find something fun to talk about..... ▽ ▽ ▽ ▽ ▽

20 \* In my family we support each other... ▽ ▽ ▽ ▽ ▽

21 **81. Have you during the past month:**

22 (Put an X for each line) Almost Often Some- Never  
23 every night times

24 \* Had difficulty falling asleep in the evening ▽ ▽ ▽ ▽

25 \* Woke too early and couldn't fall asleep again ▽ ▽ ▽ ▽

26 **82. Have any of the following things happened to you? (Put an X for each line)**

27 No Yes, last Yes, in my  
28 year life

29 \* That someone in your family has been seriously ill..... ▽ ▽ ▽

30 \* Death of a loved one..... ▽ ▽ ▽

31 \* A catastrophe (fire, avalanche, tidal wave, hurricane, etc.)..... ▽ ▽ ▽

32 \* A serious accident (ex: a very serious car accident) ..... ▽ ▽ ▽

33 \* Been violently hurt (beaten or injured) ..... ▽ ▽ ▽

34 \* Seen others violently hurt ..... ▽ ▽ ▽

35 \* Been put in sexually uncomfortable/abusive situations  
36 by someone about your age ..... ▽ ▽ ▽

37 \* Been put in sexually uncomfortable/abusive situations  
38 by an adult..... ▽ ▽ ▽

39 \* Been threatened or physically harassed by other  
40 students at school for a long time..... ▽ ▽ ▽

41 \* Received painful or frightening treatment at the hospital  
42 while being treated for an illness or injury..... ▽ ▽ ▽

43 \* Experienced something else that was very frightening,  
44 dangerous or violent..... ▽ ▽ ▽

45 **IF YOU ANSWERED NO TO ALL THE ABOVE, SKIP TO QUESTION 86**

46 16

47 If you have experienced any of the above in question 82:

48 **83. Do you still think very much about what happened?** Yes ▽ No ▽

49 **If Yes, do you have frightening thoughts, see images or hear sounds from the actual**

experience even when you don't want to? Yes  No

**84. When something reminds you about what happened do you become distant, afraid or sad?**

Yes  No

**85. Do you try to avoid talking about it, thinking about it or feel any feelings about what happened?**

Yes  No

**86. If it was an injury or accident, do you have physical (bodily) late complications/problems from this?** Yes  No

**LEISURE TIME**

**87. How many teams or clubs are you part of? (for example: sports team, boy/girl scouts, band, etc.)**

None  One  Two or more

**88. How often have you done any of these activities in the past week?**

*(Put an X for each line)*

None Once 2-3 4 times or times more

- \* Visited someone you know.....
- \* Was visited at home.....
- \* Read a book, magazine, comic book.....
- \* Listened to music .....
- \* Played an instrument .....
- \* Was out with friends for more than two hours in a row.....
- \* Was at a meeting or training with a club/team.....
- \* Did a hobby.....
- \* Did homework for more than one hour.....
- \* Watched TV/DVD .....
- \* Played a computer/TV game.....
- \* Played, chatted or surfed the internet .....
- \* Was at the library.....
- \* Went to the movies.....
- \* Was at a cafe or a meeting place for people your age.....
- \* Was in a play, theatre.....
- \* Did photography/film.....
- \* Went to a concert.....
- \* Went to watch a sport event, game.....
- \* Sang in a chore .....

17

**89. If you normally do some of the below listed activities, how long do you usually do so each**

**time?** (Put an X for each line)

Less ½ -1 More than

1  
2  
3 than ½ hour hour 1 hour

4 \* Watch TV/DVD ..... ▽ ▽ ▽

5  
6 \* Play computer/TV games..... ▽ ▽ ▽

7  
8 \* Play, chat or surf the internet ..... ▽ ▽ ▽

9 \* Listen to music..... ▽ ▽ ▽

10  
11 **90. Do you have a mobile phone?** Yes ▽ No ▽

12 *If Yes:*

13 \* How long do you usually talk on your mobile phone a day? \_\_\_\_\_ Number of minutes

14 \* How many text/picture messages do you usually get a day? \_\_\_\_\_ Number of  
15 messages

16 \* How many text/picture messages do you send a day? \_\_\_\_\_ Number of  
17 messages

18 **FAMILY AND FRIENDS**

19 **91. About how many close friends do you have?** (Include those you can speak confidentially  
20 with and  
21 who help you when you need help. Do not include people you live with, but other relatives should be  
22 included.) (One X)

23 None ▽ One ▽ Two or more ▽

24  
25 **92. Do you have a steady boyfriend/girlfriend?** Yes ▽ No, not now, but before ▽ No ▽

26 **93. Are your parents separated or divorced, or have they lived separately for more  
27 than one**

28 **year?** (*X the appropriate box and write in your age where necessary*)

29 ▽ No

30  
31 ▽ Yes, they lived separately or were separated when I was \_\_\_\_\_ years old,  
32 but they later moved back together again.

33  
34 ▽ Yes, they were divorced or separated when I was \_\_\_\_\_ years old.

35 **94. How well off do you think your family is compared to most others?** (One X)

36 About the same as most others ▽ Better financial situation ▽ Worse financial situation ▽

37 **95. Has there been or is there much arguing in your family?** (One X)

38 No ▽ Yes, the past 12 months ▽ Yes, previously ▽

39  
40 18

41 **96. How good is the relationship you have with your immediate family?** (Put an X for  
42 each line of

43 the family members you have. If you have more than one sibling, think about the sibling you have the  
44 best

45 relationship to.)

46 Very good Good Not so good Bad \*

47 Mother ..... ▽ ▽ ▽ ▽

48  
49 \* Father ..... ▽ ▽ ▽ ▽

50 \* Sibling ..... ▽ ▽ ▽ ▽

51  
52 \* Stepmother or stepfather..... ▽ ▽ ▽ ▽

53 **97. Do you often feel lonely?** (One X)

54 \* Very often ..... ▽ \* Seldom ..... ▽

55  
56 \* Often ..... ▽ \* Very seldom or never..... ▽

57  
58 \* Sometimes ..... ▽

59  
60 19

**SCHOOL**

**98. Do any of the following things happen to you at school, or have any of them happened?**

(Put an X for each line)

Never Some- Often Very often  
times

- \* Have difficulties concentrating during class ∇ ∇ ∇ ∇
- \* Think that gym or art is fun ∇ ∇ ∇ ∇
- \* Think other classes are fun ∇ ∇ ∇ ∇
- \* Argue with the teacher ∇ ∇ ∇ ∇
- \* Look forward to going to school ∇ ∇ ∇ ∇
- \* Skip school ∇ ∇ ∇ ∇
- \* Understand what is being taught ∇ ∇ ∇ ∇
- \* Have fun during recess/break time ∇ ∇ ∇ ∇
- \* Are satisfied with your test results ∇ ∇ ∇ ∇
- \* Have fistfights ∇ ∇ ∇ ∇
- \* Are reprimanded by the teacher ∇ ∇ ∇ ∇
- \* Cannot manage to be calm/sit still during class ∇ ∇ ∇ ∇
- \* Become bored or dissatisfied ∇ ∇ ∇ ∇
- \* Receive help for reading or writing problems ∇ ∇ ∇ ∇
- \* Are called a negative name by students for a long time ∇ ∇ ∇ ∇
- \* Are snubbed/excluded by the students for a long time ∇ ∇ ∇ ∇

**HEALTH SERVICES**

**99. During the last 12 months have you been to:** (Put an X for each line)

Yes No

- \* General practitioner (family doctor, doctor outside the hospital)..... ∇ ∇
- \* Doctor at the hospital ..... ∇ ∇
- \* Child health care clinic run by nurses..... ∇ ∇
- \* School health services ..... ∇ ∇
- \* Psychologist ..... ∇ ∇
- \* Physiotherapist ..... ∇ ∇
- \* Chiropractor ..... ∇ ∇
- \* Other practitioner (naturopath, reflexologist, laying on of hands, healer, psychic, etc.)..... ∇ ∇

**100. Have you been admitted to the hospital during the past 12 months?**

Yes ∇ No ∇

**101. How often have you been absent from school due to illness during the last 12 months?**

Less than 1 week ∇ 1-2 weeks ∇ More than 2 weeks ∇

20

**PHYSICAL DEVELOPMENT**

*Below are some questions about physical changes that occur through adolescence.*

**102. During the teenage years there are periods where one grows quickly (growing spurt). Have**

**you noticed that your body has grown quickly (become taller)?** (One X)

- 1  
2  
3 \* No, I have not begun to grow ..... ▽  
4  
5 \* Yes, I have barely begun a growing spurt ..... ▽  
6  
7 \* Yes, I've clearly begun a growing spurt ..... ▽  
8  
9 \* Yes, it seems that I'm finished with growing spurts ..... ▽

10 **103. Concerning hair on your body (under your arms and your crotch/groin)? Would**  
11 **you say**  
12 **that the hair on your body has: (One X)**

- 13 \* Not begun to grow yet ..... ▽  
14 \* Barely begun to grow ..... ▽  
15 \* Quite clearly begun to grow ..... ▽  
16  
17 \* It seems that my body hair has grown in ..... ▽

18 **104. When you look at yourself, do you think that you are physically maturing/have**  
19 **physically matured earlier or later than others your own age? (One X)**

- 20  
21 \* Much earlier ..... ▽ \* A little bit later ..... ▽  
22  
23 \* Earlier ..... ▽ \* Later ..... ▽  
24  
25 \* A little bit earlier ..... ▽ \* Much later ..... ▽  
26  
27 \* The same as others ..... ▽

28 **QUESTIONS FOR BOYS**

29 **105. Has your voice begun to change? (One X)**

- 30 \* No, hasn't begun yet ..... ▽  
31 \* Yes, has just barely begun ..... ▽  
32 \* Yes, has clearly begun ..... ▽  
33 \* It seems my voice has finished changing ..... ▽

34 **106. Has facial hair begun to grow (moustache or beard)? (One X)**

- 35  
36 \* No, hasn't begun yet ..... ▽  
37 \* Yes, has just barely begun ..... ▽  
38 \* Yes, has clearly begun ..... ▽  
39 \* Yes, I have quite a lot of facial hair ..... ▽

40  
41  
42  
43 21

44 **QUESTIONS FOR GIRLS**

45 **107. Have you begun to develop breasts? (One X)**

- 46 \* No, haven't begun yet ..... ▽ \* Yes, have quite clearly begun ..... ▽  
47 \* Yes, have barely begun ..... ▽ \* It seems my breasts are fully developed ..... ▽  
48  
49

50 **108. Have you begun menstruating (gotten your period)?** Yes ▽ No ▽

51 *IF YOU ANSWERED "NO", GO TO PAGE 22*

52 **109. How old were you when you first began menstruating?**

53 I was \_\_\_\_\_ years old and \_\_\_\_\_ months.

54 **110. How many times have you menstruated in the last 12 months?** \_\_\_\_\_ times

55 **111. How long is it usually between your menstruation periods?** (From the first day of a  
56 period to the  
57 first day of the next period)

58 Less than 3 weeks ▽ 3-4 weeks ▽ More than 4 weeks ▽

59 **112. Have you ever missed (not gotten) your period for several months after a regular**  
60 **period?**

(without being pregnant)? (One X)

1  
2  
3  
4 \*Yes, 2-5 mos. .... ▾ \* Yes, more than 1 year ..... ▾

5 \*Yes, 6-12 mos. .... ▾ \* No, never ..... ▾

6 **113. Have you ever taken birth control pills or the mini-pill?**

7 Yes, I take them now ▾ Yes, I took them before ▾ No ▾

8 *If Yes:*

9 **How old were you when you first began taking birth control pills/mini-pills?** \_\_\_\_\_  
10 years

11 old

12 **How long in total have you taken birth control pills/mini-pills?** \_\_\_\_\_ years old

13 22

14 FOR STUDENTS IN HIGH SCHOOL

15 These questions are only to be answered by High School students.

16 **114. During the last year, have you often felt that you pressured yourself or**  
17 **continuously**  
18 **pushed yourself?**

19 Yes ▾ No ▾ Don't know ▾

20 **115. Do you feel that you are constantly short of time, even in your everyday tasks?**

21 \* Always, or almost always ..... ▾

22 \* Sometimes ..... ▾

23 \* Never..... ▾

24 **116. Have you ever had thoughts about taking your own life?** Yes No

25 **117. Have you ever used anabolic steroids or other performance enhancing drugs?**

26 Yes No

27 **118. Have you ever had sexual intercourse?** Yes ▾ No ▾

28 If Yes, **How old were you the first time?** \_\_\_\_\_ years old

29 **119. For GIRLS: Have you ever become pregnant when you did not want to be?**

30 Yes ▾ No ▾

31 **120. For BOYS: Have you ever gotten a girl pregnant without intending to?**

32 Yes ▾ No ▾ Don't know ▾

33 **For BOTH boys and girls:**

34 *If Yes,*

35 **How old were you when this happened?** \_\_\_\_\_ years old

36 **Was the result an abortion?** Yes ▾ No ▾ Don't know ▾

37 23

38 **COMMENTS**

39 If you have time, you could write here about what you think is important, but was not  
40 asked about in this

41 questionnaire. What are your thoughts about being young these days? What do feel  
42 can be improved upon

43 concerning health and wellbeing for youth of today?

44 **Thank you for your contribution** ☺

45 **Sincerely,**

46 Turid Lingaas Holmen, førsteamanuensis/barnelege

47 **Ung-HUNT leder**

48 HUNT forskningscenter, Neptunveien 1, 7650 Verdal

49 **Telefon: 74075180**\_\_

### HUNT 3

#### Declaration of Consent form + 2nd to last page of the brochure

##### Consent

Participation in HUNT 3 and other public health studies is voluntary. The information from the health study cannot be used for research without the consent of the participants. You will be asked to sign a declaration of consent when you participate. Information and samples that you give will be stored for an indefinite time period. In the future it may be used in studies that as of yet have not been planned provided the studies are in accordance with laws and regulations.

In the future, you will be informed about new research projects that use HUNT data. This information can be found at [www.hunt.ntnu.no](http://www.hunt.ntnu.no), and in addition, once a year written information will be sent out to the public. There will also be media coverage about some of the research projects.

You can, at any time after the health study, withdraw your consent and ask that the data about you is deleted or that your blood and urine samples be destroyed. If you wish to withdraw your consent, contact HUNT Research Centre, Neptunveien 1, 7650 Verdal, Telephone 74 07 51 80, Fax 74 07 51 81 or their e-mail: [hunt@medisin.ntnu.no](mailto:hunt@medisin.ntnu.no). We will respect your wishes to not use your information in specific research projects if you request this.

##### New Consent

If in the future we need your information for new types of research questions not described in this brochure, it may be necessary to ask for a new declaration of consent. If this is the case, we will send you a letter. You may also be asked for a new consent in the eventuality of a collaboration with a private company in genetic research. The research of this type of collaboration must also adhere to public laws and regulations. Under no circumstances will blood or other biological material be sold.

##### Personal Information Protection and Security

All information that you give to HUNT 3 will be handled with respect to personal information protection and your private life and in accordance with the laws and regulations. As soon as information, blood samples and/or urine samples are collected, they are stored without being labelled using the identity of the donor. Researchers who later use the information do not have access to names, birthdates or personal identification numbers. All employees associated with the health study have an obligation of confidentiality.

The Data Inspectorate supervises to ensure that the laws and regulations concerning the storage and use of health care information are followed. HUNT 3 is licensed by the The Data Inspectorate.

##### Ethical Approval

All research projects must be approved by an ethical committee. The committee is an independent agency that evaluates the ethical aspect of research projects. HUNT 3 has been approved by The Regional Committee for Medical Research Ethics, Mid-Norway. All future research projects that use data from HUNT must gain approval from the committee.

##### HUNT Databank

HUNT databank contains information collected during HUNT 1, 2 and 3 by means of questionnaires, examinations and analyses of blood and urine samples. If you participated in HUNT 1 and 2, your information will be compared to information in HUNT 3. Genetic material is stored at the HUNT biobank. The goal of the biobank is that in the future it will be possible to take out samples, perform various analyses and compare it to the results of other



1  
2  
3 data from the HUNT databank. In this way there will be continuously more data to be put into  
4 the databank.

5 When researchers receive data from the HUNT databank there are no names, birthdates or  
6 other identifiable characteristics with the data, so they do not know who gave the information.

#### 7 Comparing Information from other Registers

8 For certain research projects it may be necessary to compare data from HUNT with other  
9 public records, for example The Norwegian Prescription Database, The Birth Register, The  
10 Cancer Register and The Cause of Death Register. HUNT data may also be compared to other  
11 registers/databases at Statistics Norway (SSB), for example concerning the environment,  
12 population, education, income, public contribution, employment and other situations that may  
13 have an effect on health.

14 In addition, it may also be relevant to obtain diagnosis information, for example hip fracture,  
15 heart attack, stroke or lung illnesses from primary health care, the hospitals in Nord-Trøndelag  
16 or St. Olavs hospital. Some projects may compare information of parents, children, siblings  
17 and grandparents if they have participated in HUNT.

18 All these comparisons require consent and/or approval from the applicable agencies, for  
19 example The Regional Committee for Medical Research Ethics, The Data Inspectorate, The  
20 Public Health Department or Social Security. All information will be handled with respect to  
21 personal information protection and your private life and in accordance with the laws and  
22 regulations. No researchers will know who gave the information.

#### 23 **Compensation**

24 There is very little risk that participation will lead to injury. If this should occur,  
25 compensation can be applied for through The Norwegian System of Compensation to Patients  
26 (NPE). NPE facilitates compensation applications for patients who have been injured in the  
27 public health care service system.

#### 28 **Young HUNT**

29 All adolescents in the age group 13 to 19 years old in Nord-Trøndelag are invited to  
30 participate in Young HUNT. The project will take place at their schools, with the filling out of  
31 the questionnaire and clinical examinations occurring during school hours. Adolescents and  
32 their parents will receive information about Young HUNT through the school.

#### 33 **Declaration of consent for use of health information in research**

34 The Nord-Trøndelag Health Study 2006-2008 (HUNT3)

35 In the brochure I received I have read about the health study's content and intent, and I have  
36 been given the opportunity to ask questions.

37  
38 I consent to participating in the study.

39  
40  
41  
42  
43  
44  
45  
46  
47  
48  
49  
50  
51 Place, date time

52  
53  
54  
55 \_\_\_\_\_  
56 Name

57 \_\_\_\_\_  
58 Date of Birth  
59  
60



**The STROBE checklist\* for the manuscript: Potentially Traumatic Interpersonal Events, Psychological Distress and Recurrent Headaches in Adolescents** A population based study The HUNT Study

The authors have aimed to adhere to the STROBE statements, in order to ensure transparency and the highest possible quality of data handling and presentation (1).

| Section/Topic             | Item # | Recommendation                                                                                                                                                                                                                                                                                                                                                                                                                                                         | Reported on page #                                                                                                                      |
|---------------------------|--------|------------------------------------------------------------------------------------------------------------------------------------------------------------------------------------------------------------------------------------------------------------------------------------------------------------------------------------------------------------------------------------------------------------------------------------------------------------------------|-----------------------------------------------------------------------------------------------------------------------------------------|
| Title and abstract        | 1      | (a) Indicate the study's design with a commonly used term in the title or the abstract                                                                                                                                                                                                                                                                                                                                                                                 | 1                                                                                                                                       |
|                           |        | (b) Provide in the abstract an informative and balanced summary of what was done and what was found                                                                                                                                                                                                                                                                                                                                                                    | 5-6                                                                                                                                     |
| <b>Introduction</b>       |        |                                                                                                                                                                                                                                                                                                                                                                                                                                                                        |                                                                                                                                         |
| Background/rationale      | 2      | Explain the scientific background and rationale for the investigation being reported                                                                                                                                                                                                                                                                                                                                                                                   | 7-9                                                                                                                                     |
| Objectives                | 3      | State specific objectives, including any pre-specified hypotheses                                                                                                                                                                                                                                                                                                                                                                                                      | 9                                                                                                                                       |
| <b>Methods</b>            |        |                                                                                                                                                                                                                                                                                                                                                                                                                                                                        | 11                                                                                                                                      |
| Study design              | 4      | Present key elements of study design early in the paper                                                                                                                                                                                                                                                                                                                                                                                                                | 10                                                                                                                                      |
| Setting                   | 5      | Describe the setting, locations, and relevant dates, including periods of recruitment, exposure, follow-up, and data collection                                                                                                                                                                                                                                                                                                                                        | 10                                                                                                                                      |
| Participants              | 6      | (a) <i>Cohort study</i> —Give the eligibility criteria, and the sources and methods of selection of participants. Describe methods of follow-up<br><i>Case-control study</i> —Give the eligibility criteria, and the sources and methods of case ascertainment and control selection. Give the rationale for the choice of cases and controls<br><i>Cross-sectional study</i> —Give the eligibility criteria, and the sources and methods of selection of participants | 10, 13-14 and supplemental flow-chart                                                                                                   |
|                           |        | (b) <i>Cohort study</i> —For matched studies, give matching criteria and number of exposed and unexposed<br><i>Case-control study</i> —For matched studies, give matching criteria and the number of controls per case                                                                                                                                                                                                                                                 | Not applicable                                                                                                                          |
| Variables                 | 7      | Clearly define all outcomes, exposures, predictors, potential confounders, and effect modifiers. Give diagnostic criteria, if applicable                                                                                                                                                                                                                                                                                                                               | 11-13                                                                                                                                   |
| Data sources/ measurement | 8*     | For each variable of interest, give sources of data and details of methods of assessment (measurement). Describe comparability of assessment methods if there is more than one group                                                                                                                                                                                                                                                                                   | 11-13                                                                                                                                   |
| Bias                      | 9      | Describe any efforts to address potential sources of bias                                                                                                                                                                                                                                                                                                                                                                                                              | 10 (we were unable to reach non-respondents, but have aimed for a transparent report of potential biases, including flowchart attached) |

|                        |     |                                                                                                                                                                                                                                                                                                           |                                       |
|------------------------|-----|-----------------------------------------------------------------------------------------------------------------------------------------------------------------------------------------------------------------------------------------------------------------------------------------------------------|---------------------------------------|
| Study size             | 10  | Explain how the study size was arrived at                                                                                                                                                                                                                                                                 | 10, 13-14 and supplemental flow-chart |
| Quantitative variables | 11  | Explain how quantitative variables were handled in the analyses. If applicable, describe which groupings were chosen and why                                                                                                                                                                              | 13-14                                 |
| Statistical methods    | 12  | (a) Describe all statistical methods, including those used to control for confounding                                                                                                                                                                                                                     | 13-14                                 |
|                        |     | (b) Describe any methods used to examine subgroups and interactions                                                                                                                                                                                                                                       | 14                                    |
|                        |     | (c) Explain how missing data were addressed                                                                                                                                                                                                                                                               | 14                                    |
|                        |     | (d) <i>Cohort study</i> —If applicable, explain how loss to follow-up was addressed<br><i>Case-control study</i> —If applicable, explain how matching of cases and controls was addressed<br><i>Cross-sectional study</i> —If applicable, describe analytical methods taking account of sampling strategy | 13-14                                 |
|                        |     | (e) Describe any sensitivity analyses                                                                                                                                                                                                                                                                     | Not done                              |
| <b>Results</b>         |     |                                                                                                                                                                                                                                                                                                           |                                       |
| Participants           | 13* | (a) Report numbers of individuals at each stage of study—eg numbers potentially eligible, examined for eligibility, confirmed eligible, included in the study, completing follow-up, and analysed                                                                                                         | 13-14                                 |
|                        |     | (b) Give reasons for non-participation at each stage                                                                                                                                                                                                                                                      | 10, 13-14                             |
|                        |     | (c) Consider use of a flow diagram                                                                                                                                                                                                                                                                        | Attached                              |
| Descriptive data       | 14* | (a) Give characteristics of study participants (eg demographic, clinical, social) and information on exposures and potential confounders                                                                                                                                                                  | 16-18                                 |
|                        |     | (b) Indicate number of participants with missing data for each variable of interest                                                                                                                                                                                                                       | Table 1                               |
|                        |     | (c) <i>Cohort study</i> —Summarise follow-up time (eg, average and total amount)                                                                                                                                                                                                                          | Not applicable                        |
| Outcome data           | 15* | <i>Cohort study</i> —Report numbers of outcome events or summary measures over time                                                                                                                                                                                                                       | Not applicable                        |
|                        |     | <i>Case-control study</i> —Report numbers in each exposure category, or summary measures of exposure                                                                                                                                                                                                      | Not applicable                        |
|                        |     | <i>Cross-sectional study</i> —Report numbers of outcome events or summary measures                                                                                                                                                                                                                        | 16-28                                 |
| Main results           | 16  | (a) Give unadjusted estimates and, if applicable, confounder-adjusted estimates and their precision (eg, 95% confidence interval). Make clear which confounders were adjusted for and why they were included                                                                                              | 16-28                                 |
|                        |     | (b) Report category boundaries when continuous variables were categorized                                                                                                                                                                                                                                 | 16-28                                 |
|                        |     | (c) If relevant, consider translating estimates of relative risk into absolute risk for a meaningful time period                                                                                                                                                                                          | 26-28                                 |
| Other analyses         | 17  | Report other analyses done—eg analyses of subgroups and interactions, and sensitivity analyses                                                                                                                                                                                                            | Supplemental file                     |
| <b>Discussion</b>      |     |                                                                                                                                                                                                                                                                                                           |                                       |
| Key results            | 18  | Summarise key results with reference to study objectives                                                                                                                                                                                                                                                  | 29                                    |
| Limitations            | 19  | Discuss limitations of the study, taking into account sources of potential bias or imprecision. Discuss both direction and magnitude of any potential bias                                                                                                                                                | 29-30                                 |

1  
2  
3  
4  
5  
6  
7  
8  
9  
10  
11  
12  
13  
14  
15  
16  
17  
18  
19  
20  
21  
22  
23  
24  
25  
26  
27  
28  
29  
30  
31  
32  
33  
34  
35  
36  
37  
38  
39  
40  
41  
42  
43  
44  
45  
46  
47  
48  
49

|                          |    |                                                                                                                                                                            |       |
|--------------------------|----|----------------------------------------------------------------------------------------------------------------------------------------------------------------------------|-------|
| Interpretation           | 20 | Give a cautious overall interpretation of results considering objectives, limitations, multiplicity of analyses, results from similar studies, and other relevant evidence | 29-33 |
| Generalisability         | 21 | Discuss the generalisability (external validity) of the study results                                                                                                      | 29-33 |
| <b>Other information</b> |    |                                                                                                                                                                            |       |
| Funding                  | 22 | Give the source of funding and the role of the funders for the present study and, if applicable, for the original study on which the present article is based              | 36    |

\*Give information separately for cases and controls in case-control studies and, if applicable, for exposed and unexposed groups in cohort and cross-sectional studies.  
**Note:** An Explanation and Elaboration article discusses each checklist item and gives methodological background and published examples of transparent reporting. The STROBE checklist is best used in conjunction with this article (freely available on the Web sites of PLoS Medicine at <http://www.plosmedicine.org/>, Annals of Internal Medicine at <http://www.annals.org/>, and Epidemiology at <http://www.epidem.com/>). Information on the STROBE Initiative is available at [www.strobe-statement.org](http://www.strobe-statement.org).

1. von Elm E, Altman DG, Egger M, Pocock SJ, Gotsche PC, Vandembroucke JP, et al. Strengthening the Reporting of Observational Studies in Epidemiology (STROBE) statement: guidelines for reporting observational studies. *BMJ*. 2007 Oct 335(7624):806-8.
